# Supplementary material for: Innovative statistical approaches: the use of neural networks reduces the sample size in the splenectomy-MCAO mouse model
Source: PubMed Central journal article supplement (PMC11074938; doi:10.3325/cmj.2024.65.122), 2024-04
Supplement: CroatMedJ_65_s001.pdf [file CroatMedJ_65_s001.pdf]

**Supplemental Table 1.** The prediction accuracy of the ANN SPLX class depending on the exclusion of variables and their combinations. The ANN was trained using a dataset with all days after a stroke. Values in the table are sorted based on the mean accuracy of SPLX class predictions.

| “Out” variable                  | “In” variable                                                      | The mean accuracy value of ANN predictions for the SPLX class. | SD of accuracy in predictions for the ANN SPLX class. |
|---------------------------------|--------------------------------------------------------------------|----------------------------------------------------------------|-------------------------------------------------------|
| None                            | Day_nr-MRI_IPSI-MRI_CONTRA-WEIGHT-NS-BLI_max_flux-BLI_max_radiance | 0.7736                                                         | 0.0234                                                |
| MRI_CONTRA                      | Day_nr-MRI_IPSI-WEIGHT-NS-BLI_max_flux-BLI_max_radiance            | 0.7700                                                         | 0.0257                                                |
| MRI_IPSI                        | Day_nr-MRI_CONTRA-WEIGHT-NS-BLI_max_flux-BLI_max_radiance          | 0.7698                                                         | 0.0258                                                |
| BLI_max_radiance                | Day_nr-MRI_IPSI-MRI_CONTRA-WEIGHT-NS-BLI_max_flux                  | 0.7597                                                         | 0.0223                                                |
| WEIGHT                          | Day_nr-MRI_IPSI-MRI_CONTRA-NS-BLI_max_flux-BLI_max_radiance        | 0.7577                                                         | 0.0236                                                |
| Day_nr-MRI_IPSI-NS-BLI_max_flux | MRI_CONTRA-WEIGHT-BLI_max_radiance                                 | 0.7567                                                         | 0.0440                                                |
| MRI_IPSI-MRI_CONTRA             | Day_nr-WEIGHT-NS-BLI_max_flux-BLI_max_radiance                     | 0.7566                                                         | 0.0256                                                |
| MRI_CONTRA-BLI_max_radiance     | Day_nr-MRI_IPSI-WEIGHT-NS-BLI_max_flux                             | 0.7552                                                         | 0.0239                                                |
| MRI_IPSI-WEIGHT                 | Day_nr-MRI_CONTRA-NS-BLI_max_flux-BLI_max_radiance                 | 0.7549                                                         | 0.0238                                                |
| MRI_IPSI-BLI_max_radiance       | Day_nr-MRI_CONTRA-WEIGHT-NS-BLI_max_flux                           | 0.7542                                                         | 0.0240                                                |
| NS                              | Day_nr-MRI_IPSI-MRI_CONTRA-WEIGHT-BLI_max_flux-BLI_max_radiance    | 0.7534                                                         | 0.0350                                                |

|                                                  |                                                             |        |        |
|--------------------------------------------------|-------------------------------------------------------------|--------|--------|
| Day_nr-MRI_IPSI-BLI_max_flux                     | MRI_CONTRA-WEIGHT-NS-BLI_max_radiance                       | 0.7534 | 0.0405 |
| MRI_CONTRA-WEIGHT                                | Day_nr-MRI_IPSI-NS-BLI_max_flux-BLI_max_radiance            | 0.7508 | 0.0241 |
| Day_nr                                           | MRI_IPSI-MRI_CONTRA-WEIGHT-NS-BLI_max_flux-BLI_max_radiance | 0.7501 | 0.0297 |
| Day_nr-BLI_max_radiance                          | MRI_IPSI-MRI_CONTRA-WEIGHT-NS-BLI_max_flux                  | 0.7498 | 0.0311 |
| Day_nr-MRI_IPSI-BLI_max_flux-BLI_max_radiance    | MRI_CONTRA-WEIGHT-NS                                        | 0.7485 | 0.0292 |
| MRI_CONTRA-NS                                    | Day_nr-MRI_IPSI-WEIGHT-BLI_max_flux-BLI_max_radiance        | 0.7450 | 0.0304 |
| NS-BLI_max_radiance                              | Day_nr-MRI_IPSI-MRI_CONTRA-WEIGHT-BLI_max_flux              | 0.7445 | 0.0344 |
| MRI_IPSI-NS                                      | Day_nr-MRI_CONTRA-WEIGHT-BLI_max_flux-BLI_max_radiance      | 0.7420 | 0.0340 |
| WEIGHT-BLI_max_radiance                          | Day_nr-MRI_IPSI-MRI_CONTRA-NS-BLI_max_flux                  | 0.7409 | 0.0247 |
| MRI_IPSI-MRI_CONTRA-BLI_max_radiance             | Day_nr-WEIGHT-NS-BLI_max_flux                               | 0.7404 | 0.0221 |
| BLI_max_flux                                     | Day_nr-MRI_IPSI-MRI_CONTRA-WEIGHT-NS-BLI_max_radiance       | 0.7391 | 0.0308 |
| MRI_IPSI-MRI_CONTRA-WEIGHT                       | Day_nr-NS-BLI_max_flux-BLI_max_radiance                     | 0.7379 | 0.0258 |
| Day_nr-NS-BLI_max_flux-BLI_max_radiance          | MRI_IPSI-MRI_CONTRA-WEIGHT                                  | 0.7351 | 0.0335 |
| Day_nr-MRI_IPSI-NS-BLI_max_flux-BLI_max_radiance | MRI_CONTRA-WEIGHT                                           | 0.7347 | 0.0326 |
| MRI_IPSI-WEIGHT-BLI_max_radiance                 | Day_nr-MRI_CONTRA-NS-BLI_max_flux                           | 0.7346 | 0.0220 |
| Day_nr-NS                                        | MRI_IPSI-MRI_CONTRA-WEIGHT-BLI_max_flux-BLI_max_radiance    | 0.7336 | 0.0310 |

|                                               |                                                              |        |        |
|-----------------------------------------------|--------------------------------------------------------------|--------|--------|
| MRI_IPSI-NS-BLI_max_flux-<br>BLI_max_radiance | Day_nr-MRI_CONTRA-WEIGHT                                     | 0.7328 | 0.0314 |
| WEIGHT-NS                                     | Day_nr-MRI_IPSI-MRI_CONTRA-<br>BLI_max_flux-BLI_max_radiance | 0.7315 | 0.0329 |
| Day_nr-BLI_max_flux-<br>BLI_max_radiance      | MRI_IPSI-MRI_CONTRA-<br>WEIGHT-NS                            | 0.7315 | 0.0262 |
| Day_nr-MRI_CONTRA                             | MRI_IPSI-WEIGHT-NS-<br>BLI_max_flux-BLI_max_radiance         | 0.7301 | 0.0287 |
| MRI_CONTRA-NS-<br>BLI_max_radiance            | Day_nr-MRI_IPSI-WEIGHT-<br>BLI_max_flux                      | 0.7294 | 0.0324 |
| MRI_CONTRA-<br>BLI_max_flux                   | Day_nr-MRI_IPSI-WEIGHT-NS-<br>BLI_max_radiance               | 0.7284 | 0.0349 |
| Day_nr-NS-BLI_max_radiance                    | MRI_IPSI-MRI_CONTRA-<br>WEIGHT-BLI_max_flux                  | 0.7277 | 0.0422 |
| Day_nr-MRI_IPSI-NS                            | MRI_CONTRA-WEIGHT-<br>BLI_max_flux-BLI_max_radiance          | 0.7265 | 0.0568 |
| Day_nr-WEIGHT                                 | MRI_IPSI-MRI_CONTRA-NS-<br>BLI_max_flux-BLI_max_radiance     | 0.7262 | 0.0287 |
| BLI_max_flux-<br>BLI_max_radiance             | Day_nr-MRI_IPSI-MRI_CONTRA-<br>WEIGHT-NS                     | 0.7251 | 0.0268 |
| Day_nr-NS-BLI_max_flux                        | MRI_IPSI-MRI_CONTRA-<br>WEIGHT-BLI_max_radiance              | 0.7251 | 0.0532 |
| Day_nr-BLI_max_flux                           | MRI_IPSI-MRI_CONTRA-<br>WEIGHT-NS-BLI_max_radiance           | 0.7237 | 0.0332 |
| Day_nr-MRI_CONTRA-<br>BLI_max_radiance        | MRI_IPSI-WEIGHT-NS-<br>BLI_max_flux                          | 0.7232 | 0.0265 |
| MRI_CONTRA-WEIGHT-NS                          | Day_nr-MRI_IPSI-BLI_max_flux-<br>BLI_max_radiance            | 0.7227 | 0.0365 |
| MRI_IPSI-MRI_CONTRA-NS                        | Day_nr-WEIGHT-BLI_max_flux-<br>BLI_max_radiance              | 0.7215 | 0.0258 |
| Day_nr-MRI_IPSI-<br>BLI_max_radiance          | MRI_CONTRA-WEIGHT-NS-<br>BLI_max_flux                        | 0.7209 | 0.0633 |
| MRI_IPSI-WEIGHT-NS                            | Day_nr-MRI_CONTRA-<br>BLI_max_flux-BLI_max_radiance          | 0.7205 | 0.0330 |
| Day_nr-MRI_IPSI-                              | WEIGHT-BLI_max_radiance                                      | 0.7199 | 0.0434 |

|                                             |                                                        |        |        |
|---------------------------------------------|--------------------------------------------------------|--------|--------|
| MRI_CONTRA-NS-<br>BLI_max_flux              |                                                        |        |        |
| MRI_IPSI-NS-<br>BLI_max_radiance            | Day_nr-MRI_CONTRA-WEIGHT-<br>BLI_max_flux              | 0.7198 | 0.0349 |
| Day_nr-MRI_IPSI-NS-<br>BLI_max_radiance     | MRI_CONTRA-WEIGHT-<br>BLI_max_flux                     | 0.7193 | 0.0519 |
| Day_nr-MRI_IPSI                             | MRI_CONTRA-WEIGHT-NS-<br>BLI_max_flux-BLI_max_radiance | 0.7183 | 0.0543 |
| MRI_IPSI-NS-BLI_max_flux                    | Day_nr-MRI_CONTRA-WEIGHT-<br>BLI_max_radiance          | 0.7174 | 0.0552 |
| Day_nr-WEIGHT-<br>BLI_max_radiance          | MRI_IPSI-MRI_CONTRA-NS-<br>BLI_max_flux                | 0.7173 | 0.0298 |
| Day_nr-MRI_CONTRA-NS                        | MRI_IPSI-WEIGHT-BLI_max_flux-<br>BLI_max_radiance      | 0.7139 | 0.0330 |
| MRI_IPSI-BLI_max_flux                       | Day_nr-MRI_CONTRA-WEIGHT-<br>NS-BLI_max_radiance       | 0.7135 | 0.0293 |
| WEIGHT-BLI_max_flux                         | Day_nr-MRI_IPSI-MRI_CONTRA-<br>NS-BLI_max_radiance     | 0.7116 | 0.0299 |
| MRI_IPSI-MRI_CONTRA-<br>WEIGHT-NS           | Day_nr-BLI_max_flux-<br>BLI_max_radiance               | 0.7106 | 0.0257 |
| NS-BLI_max_flux-<br>BLI_max_radiance        | Day_nr-MRI_IPSI-MRI_CONTRA-<br>WEIGHT                  | 0.7103 | 0.0267 |
| MRI_CONTRA-WEIGHT-<br>BLI_max_radiance      | Day_nr-MRI_IPSI-NS-<br>BLI_max_flux                    | 0.7080 | 0.0180 |
| Day_nr-MRI_CONTRA-NS-<br>BLI_max_radiance   | MRI_IPSI-WEIGHT-BLI_max_flux                           | 0.7075 | 0.0325 |
| MRI_IPSI-MRI_CONTRA-<br>NS-BLI_max_radiance | Day_nr-WEIGHT-BLI_max_flux                             | 0.7064 | 0.0241 |
| MRI_IPSI-BLI_max_flux-<br>BLI_max_radiance  | Day_nr-MRI_CONTRA-WEIGHT-<br>NS                        | 0.7063 | 0.0281 |
| Day_nr-WEIGHT-NS                            | MRI_IPSI-MRI_CONTRA-<br>BLI_max_flux-BLI_max_radiance  | 0.7060 | 0.0352 |
| Day_nr-MRI_CONTRA-<br>BLI_max_flux          | MRI_IPSI-WEIGHT-NS-<br>BLI_max_radiance                | 0.7054 | 0.0270 |
| Day_nr-MRI_IPSI-WEIGHT-                     | MRI_CONTRA-BLI_max_radiance                            | 0.7052 | 0.0470 |

|                                                         |                                                    |        |        |
|---------------------------------------------------------|----------------------------------------------------|--------|--------|
| NS-BLI_max_flux                                         |                                                    |        |        |
| WEIGHT-NS-BLI_max_radiance                              | Day_nr-MRI_IPSI-MRI_CONTRA-BLI_max_flux            | 0.7042 | 0.0407 |
| MRI_CONTRA-WEIGHT-BLI_max_flux                          | Day_nr-MRI_IPSI-NS-BLI_max_radiance                | 0.7040 | 0.0262 |
| Day_nr-MRI_CONTRA-WEIGHT                                | MRI_IPSI-NS-BLI_max_flux-BLI_max_radiance          | 0.7034 | 0.0298 |
| MRI_IPSI-MRI_CONTRA-WEIGHT-BLI_max_radiance             | Day_nr-NS-BLI_max_flux                             | 0.7023 | 0.0265 |
| MRI_IPSI-MRI_CONTRA-BLI_max_flux                        | Day_nr-WEIGHT-NS-BLI_max_radiance                  | 0.7012 | 0.0282 |
| Day_nr-MRI_IPSI-WEIGHT-NS-BLI_max_flux-BLI_max_radiance | MRI_CONTRA                                         | 0.7003 | 0.0341 |
| NS-BLI_max_flux                                         | Day_nr-MRI_IPSI-MRI_CONTRA-WEIGHT-BLI_max_radiance | 0.6997 | 0.0307 |
| MRI_IPSI-WEIGHT-NS-BLI_max_radiance                     | Day_nr-MRI_CONTRA-BLI_max_flux                     | 0.6983 | 0.0331 |
| MRI_CONTRA-BLI_max_flux-BLI_max_radiance                | Day_nr-MRI_IPSI-WEIGHT-NS                          | 0.6970 | 0.0229 |
| Day_nr-WEIGHT-NS-BLI_max_radiance                       | MRI_IPSI-MRI_CONTRA-BLI_max_flux                   | 0.6965 | 0.0363 |
| Day_nr-WEIGHT-NS-BLI_max_flux-BLI_max_radiance          | MRI_IPSI-MRI_CONTRA                                | 0.6948 | 0.0464 |
| WEIGHT-BLI_max_flux-BLI_max_radiance                    | Day_nr-MRI_IPSI-MRI_CONTRA-NS                      | 0.6947 | 0.0230 |
| MRI_IPSI-WEIGHT-BLI_max_flux                            | Day_nr-MRI_CONTRA-NS-BLI_max_radiance              | 0.6946 | 0.0260 |
| Day_nr-MRI_CONTRA-WEIGHT-BLI_max_radiance               | MRI_IPSI-NS-BLI_max_flux                           | 0.6942 | 0.0287 |
| MRI_IPSI-WEIGHT-NS-BLI_max_flux-BLI_max_radiance        | Day_nr-MRI_CONTRA                                  | 0.6910 | 0.0343 |
| Day_nr-MRI_CONTRA-NS-                                   | MRI_IPSI-WEIGHT                                    | 0.6866 | 0.0394 |

|                                                                      |                                                 |        |        |
|----------------------------------------------------------------------|-------------------------------------------------|--------|--------|
| BLI_max_flux-<br>BLI_max_radiance                                    |                                                 |        |        |
| Day_nr-WEIGHT-<br>BLI_max_flux                                       | MRI_IPSI-MRI_CONTRA-NS-<br>BLI_max_radiance     | 0.6858 | 0.0310 |
| Day_nr-WEIGHT-<br>BLI_max_flux-<br>BLI_max_radiance                  | MRI_IPSI-MRI_CONTRA-NS                          | 0.6844 | 0.0280 |
| Day_nr-MRI_CONTRA-<br>WEIGHT-NS                                      | MRI_IPSI-BLI_max_flux-<br>BLI_max_radiance      | 0.6838 | 0.0342 |
| Day_nr-MRI_CONTRA-<br>BLI_max_flux-<br>BLI_max_radiance              | MRI_IPSI-WEIGHT-NS                              | 0.6836 | 0.0239 |
| Day_nr-MRI_CONTRA-NS-<br>BLI_max_flux                                | MRI_IPSI-WEIGHT-<br>BLI_max_radiance            | 0.6806 | 0.0371 |
| MRI_IPSI-MRI_CONTRA-<br>WEIGHT-BLI_max_flux                          | Day_nr-NS-BLI_max_radiance                      | 0.6804 | 0.0301 |
| MRI_CONTRA-WEIGHT-NS-<br>BLI_max_radiance                            | Day_nr-MRI_IPSI-BLI_max_flux                    | 0.6770 | 0.0355 |
| MRI_CONTRA-NS-<br>BLI_max_flux                                       | Day_nr-MRI_IPSI-WEIGHT-<br>BLI_max_radiance     | 0.6751 | 0.0209 |
| MRI_CONTRA-NS-<br>BLI_max_flux-<br>BLI_max_radiance                  | Day_nr-MRI_IPSI-WEIGHT                          | 0.6719 | 0.0273 |
| Day_nr-MRI_CONTRA-<br>WEIGHT-NS-<br>BLI_max_radiance                 | MRI_IPSI-BLI_max_flux                           | 0.6716 | 0.0343 |
| Day_nr-MRI_IPSI-<br>MRI_CONTRA-<br>BLI_max_flux-<br>BLI_max_radiance | WEIGHT-NS                                       | 0.6700 | 0.0673 |
| WEIGHT-NS-BLI_max_flux                                               | Day_nr-MRI_IPSI-MRI_CONTRA-<br>BLI_max_radiance | 0.6691 | 0.0475 |
| MRI_IPSI-WEIGHT-<br>BLI_max_flux-<br>BLI_max_radiance                | Day_nr-MRI_CONTRA-NS                            | 0.6687 | 0.0268 |
| Day_nr-MRI_CONTRA-<br>WEIGHT-BLI_max_flux                            | MRI_IPSI-NS-BLI_max_radiance                    | 0.6675 | 0.0303 |

|                                                             |                                             |        |        |
|-------------------------------------------------------------|---------------------------------------------|--------|--------|
| Day_nr-MRI_IPSI-MRI_CONTRA-NS                               | WEIGHT-BLI_max_flux-BLI_max_radiance        | 0.6674 | 0.0312 |
| WEIGHT-NS-BLI_max_flux-BLI_max_radiance                     | Day_nr-MRI_IPSI-MRI_CONTRA                  | 0.6666 | 0.0418 |
| Day_nr-MRI_IPSI-WEIGHT                                      | MRI_CONTRA-NS-BLI_max_flux-BLI_max_radiance | 0.6662 | 0.0287 |
| Day_nr-MRI_IPSI-WEIGHT-BLI_max_radiance                     | MRI_CONTRA-NS-BLI_max_flux                  | 0.6641 | 0.0259 |
| MRI_IPSI-MRI_CONTRA-NS-BLI_max_flux-BLI_max_radiance        | Day_nr-WEIGHT                               | 0.6639 | 0.0290 |
| MRI_IPSI-MRI_CONTRA-WEIGHT-NS-BLI_max_radiance              | Day_nr-BLI_max_flux                         | 0.6629 | 0.0214 |
| MRI_IPSI-MRI_CONTRA-BLI_max_flux-BLI_max_radiance           | Day_nr-WEIGHT-NS                            | 0.6628 | 0.0265 |
| MRI_CONTRA-WEIGHT-NS-BLI_max_flux                           | Day_nr-MRI_IPSI-BLI_max_radiance            | 0.6624 | 0.0427 |
| MRI_IPSI-MRI_CONTRA-NS-BLI_max_flux                         | Day_nr-WEIGHT-BLI_max_radiance              | 0.6620 | 0.0463 |
| Day_nr-MRI_IPSI-MRI_CONTRA                                  | WEIGHT-NS-BLI_max_flux-BLI_max_radiance     | 0.6619 | 0.0244 |
| Day_nr-MRI_IPSI-MRI_CONTRA-BLI_max_flux                     | WEIGHT-NS-BLI_max_radiance                  | 0.6615 | 0.0429 |
| Day_nr-WEIGHT-NS-BLI_max_flux                               | MRI_IPSI-MRI_CONTRA-BLI_max_radiance        | 0.6615 | 0.0414 |
| Day_nr-MRI_IPSI-MRI_CONTRA-NS-BLI_max_flux-BLI_max_radiance | WEIGHT                                      | 0.6609 | 0.0232 |
| Day_nr-MRI_IPSI-MRI_CONTRA-BLI_max_radiance                 | WEIGHT-NS-BLI_max_flux                      | 0.6600 | 0.0231 |
| Day_nr-MRI_IPSI-WEIGHT-NS                                   | MRI_CONTRA-BLI_max_flux-BLI_max_radiance    | 0.6575 | 0.0350 |

|                                                                  |                                        |        |        |
|------------------------------------------------------------------|----------------------------------------|--------|--------|
| MRI_IPSI-WEIGHT-NS-<br>BLI_max_flux                              | Day_nr-MRI_CONTRA-<br>BLI_max_radiance | 0.6547 | 0.0423 |
| Day_nr-MRI_IPSI-<br>MRI_CONTRA-WEIGHT-<br>BLI_max_radiance       | NS-BLI_max_flux                        | 0.6520 | 0.0242 |
| Day_nr-MRI_IPSI-<br>MRI_CONTRA-NS-<br>BLI_max_radiance           | WEIGHT-BLI_max_flux                    | 0.6519 | 0.0341 |
| Day_nr-MRI_IPSI-WEIGHT-<br>BLI_max_flux                          | MRI_CONTRA-NS-<br>BLI_max_radiance     | 0.6509 | 0.0458 |
| MRI_CONTRA-WEIGHT-<br>BLI_max_flux-<br>BLI_max_radiance          | Day_nr-MRI_IPSI-NS                     | 0.6496 | 0.0279 |
| Day_nr-MRI_IPSI-WEIGHT-<br>NS-BLI_max_radiance                   | MRI_CONTRA-BLI_max_flux                | 0.6484 | 0.0459 |
| Day_nr-MRI_IPSI-<br>MRI_CONTRA-WEIGHT                            | NS-BLI_max_flux-<br>BLI_max_radiance   | 0.6476 | 0.0258 |
| Day_nr-MRI_CONTRA-<br>WEIGHT-BLI_max_flux-<br>BLI_max_radiance   | MRI_IPSI-NS                            | 0.6417 | 0.0251 |
| Day_nr-MRI_IPSI-<br>MRI_CONTRA-WEIGHT-NS                         | BLI_max_flux-BLI_max_radiance          | 0.6400 | 0.0257 |
| Day_nr-MRI_IPSI-WEIGHT-<br>BLI_max_flux-<br>BLI_max_radiance     | MRI_CONTRA-NS                          | 0.6287 | 0.0407 |
| MRI_IPSI-MRI_CONTRA-<br>WEIGHT-NS-BLI_max_flux                   | Day_nr-BLI_max_radiance                | 0.6287 | 0.0388 |
| Day_nr-MRI_IPSI-<br>MRI_CONTRA-WEIGHT-<br>BLI_max_flux           | NS-BLI_max_radiance                    | 0.6145 | 0.0278 |
| MRI_IPSI-MRI_CONTRA-<br>WEIGHT-BLI_max_flux-<br>BLI_max_radiance | Day_nr-NS                              | 0.6141 | 0.0125 |
| Day_nr-MRI_CONTRA-<br>WEIGHT-NS-BLI_max_flux                     | MRI_IPSI-BLI_max_radiance              | 0.6073 | 0.0312 |
| Day_nr-MRI_IPSI-<br>MRI_CONTRA-WEIGHT-NS-                        | BLI_max_flux                           | 0.6036 | 0.0184 |



|                                                                             |                  |        |        |
|-----------------------------------------------------------------------------|------------------|--------|--------|
| BLI_max_radiance                                                            |                  |        |        |
| Day_nr-MRI_IPSI-<br>MRI_CONTRA-WEIGHT-<br>BLI_max_flux-<br>BLI_max_radiance | NS               | 0.5859 | 0.0129 |
| MRI_CONTRA-WEIGHT-NS-<br>BLI_max_flux-<br>BLI_max_radiance                  | Day_nr-MRI_IPSI  | 0.5714 | 0.0264 |
| Day_nr-MRI_IPSI-<br>MRI_CONTRA-WEIGHT-NS-<br>BLI_max_flux                   | BLI_max_radiance | 0.5619 | 0.0235 |
| Day_nr-MRI_CONTRA-<br>WEIGHT-NS-BLI_max_flux-<br>BLI_max_radiance           | MRI_IPSI         | 0.5587 | 0.0258 |
| MRI_IPSI-MRI_CONTRA-<br>WEIGHT-NS-BLI_max_flux-<br>BLI_max_radiance         | Day_nr           | 0.4134 | 0.1784 |

ANN - artificial neural network; SPLX - splenectomized mice group; SD - standard deviation; MRI\_CONTRA - volume of the contralateral hemisphere measured by MRI; MRI\_IPSI - volume of the ipsilateral hemisphere measured by MRI; BLI\_max\_radiance - area of peak radiation measured by bioluminescence method; BLI\_max\_flux - area of peak growth measured by bioluminescence method; WEIGHT - animal weight; Day\_nr - day from the middle cerebral artery occlusion (MCAO) procedure; NS - scoring of phenotypic neurological assessment.
