# Supplementary material for: Innovative statistical approaches: the use of neural networks reduces the sample size in the splenectomy-MCAO mouse model
Source: PubMed Central journal article supplement (PMC11074938; doi:10.3325/cmj.2024.65.122), 2024-04
Supplement: CroatMedJ_65_s002.pdf [file CroatMedJ_65_s002.pdf]

**Supplemental Table 2.** The prediction accuracy of the ANN SPL-sham class depending on the exclusion of variables and their combinations. The ANN was trained using a dataset with all days after a stroke. Values in the table are sorted based on the mean accuracy of SPL-sham class predictions.

| “Out” variable                          | “In” variable                                                      | The mean accuracy value of ANN predictions for the SPL-sham class | SD of accuracy in predictions for the ANN SPL-sham class |
|-----------------------------------------|--------------------------------------------------------------------|-------------------------------------------------------------------|----------------------------------------------------------|
| MRI_IPSI-MRI_CONTRA-WEIGHT              | Day_nr-NS-BLI_max_flux-BLI_max_radiance                            | 0.8321                                                            | 0.0277                                                   |
| MRI_CONTRA-WEIGHT                       | Day_nr-MRI_IPSI-NS-BLI_max_flux-BLI_max_radiance                   | 0.8218                                                            | 0.0272                                                   |
| MRI_IPSI-WEIGHT                         | Day_nr-MRI_CONTRA-NS-BLI_max_flux-BLI_max_radiance                 | 0.8161                                                            | 0.0390                                                   |
| MRI_IPSI-MRI_CONTRA-WEIGHT-NS           | Day_nr-BLI_max_flux-BLI_max_radiance                               | 0.8146                                                            | 0.0328                                                   |
| MRI_IPSI-MRI_CONTRA                     | Day_nr-WEIGHT-NS-BLI_max_flux-BLI_max_radiance                     | 0.8088                                                            | 0.0299                                                   |
| MRI_CONTRA-WEIGHT-NS                    | Day_nr-MRI_IPSI-BLI_max_flux-BLI_max_radiance                      | 0.8084                                                            | 0.0450                                                   |
| MRI_IPSI                                | Day_nr-MRI_CONTRA-WEIGHT-NS-BLI_max_flux-BLI_max_radiance          | 0.8074                                                            | 0.0265                                                   |
| MRI_IPSI-MRI_CONTRA-WEIGHT-BLI_max_flux | Day_nr-NS-BLI_max_radiance                                         | 0.8004                                                            | 0.0372                                                   |
| None                                    | Day_nr-MRI_IPSI-MRI_CONTRA-WEIGHT-NS-BLI_max_flux-BLI_max_radiance | 0.8000                                                            | 0.0264                                                   |
| WEIGHT                                  | Day_nr-MRI_IPSI-                                                   | 0.7997                                                            | 0.0300                                                   |

|                                                            |                                                                             |        |        |
|------------------------------------------------------------|-----------------------------------------------------------------------------|--------|--------|
|                                                            | MRI_CONTRA-NS-<br>BLI_max_flux-<br>BLI_max_radiance                         |        |        |
| MRI_CONTRA                                                 | Day_nr-MRI_IPSI-WEIGHT-<br>NS-BLI_max_flux-<br>BLI_max_radiance             | 0.7985 | 0.0276 |
| MRI_CONTRA-WEIGHT-<br>BLI_max_flux                         | Day_nr-MRI_IPSI-NS-<br>BLI_max_radiance                                     | 0.7975 | 0.0409 |
| MRI_IPSI-WEIGHT-NS                                         | Day_nr-MRI_CONTRA-<br>BLI_max_flux-<br>BLI_max_radiance                     | 0.7944 | 0.0474 |
| MRI_IPSI-BLI_max_radiance                                  | Day_nr-MRI_CONTRA-<br>WEIGHT-NS-BLI_max_flux                                | 0.7875 | 0.0271 |
| MRI_CONTRA-WEIGHT-<br>BLI_max_radiance                     | Day_nr-MRI_IPSI-NS-<br>BLI_max_flux                                         | 0.7875 | 0.0263 |
| NS                                                         | Day_nr-MRI_IPSI-<br>MRI_CONTRA-WEIGHT-<br>BLI_max_flux-<br>BLI_max_radiance | 0.7859 | 0.0272 |
| WEIGHT-NS                                                  | Day_nr-MRI_IPSI-<br>MRI_CONTRA-<br>BLI_max_flux-<br>BLI_max_radiance        | 0.7859 | 0.0449 |
| Day_nr-MRI_IPSI-<br>MRI_CONTRA-WEIGHT-<br>BLI_max_radiance | NS-BLI_max_flux                                                             | 0.7852 | 0.0332 |
| MRI_IPSI-MRI_CONTRA-<br>WEIGHT-NS-BLI_max_flux             | Day_nr-BLI_max_radiance                                                     | 0.7852 | 0.0383 |
| MRI_IPSI-NS                                                | Day_nr-MRI_CONTRA-<br>WEIGHT-BLI_max_flux-<br>BLI_max_radiance              | 0.7849 | 0.0279 |
| MRI_IPSI-MRI_CONTRA-<br>BLI_max_radiance                   | Day_nr-WEIGHT-NS-<br>BLI_max_flux                                           | 0.7837 | 0.0244 |
| BLI_max_radiance                                           | Day_nr-MRI_IPSI-<br>MRI_CONTRA-WEIGHT-                                      | 0.7832 | 0.0313 |

|                                             |                                                             |        |        |
|---------------------------------------------|-------------------------------------------------------------|--------|--------|
|                                             | NS-BLI_max_flux                                             |        |        |
| Day_nr-MRI_IPSI-WEIGHT-BLI_max_radiance     | MRI_CONTRA-NS-BLI_max_flux                                  | 0.7822 | 0.0322 |
| MRI_CONTRA-WEIGHT-NS-BLI_max_flux           | Day_nr-MRI_IPSI-BLI_max_radiance                            | 0.7791 | 0.0551 |
| MRI_CONTRA-BLI_max_radiance                 | Day_nr-MRI_IPSI-WEIGHT-NS-BLI_max_flux                      | 0.7778 | 0.0297 |
| Day_nr-MRI_IPSI-MRI_CONTRA-BLI_max_radiance | WEIGHT-NS-BLI_max_flux                                      | 0.7762 | 0.0337 |
| MRI_IPSI-MRI_CONTRA-WEIGHT-BLI_max_radiance | Day_nr-NS-BLI_max_flux                                      | 0.7739 | 0.0332 |
| Day_nr-BLI_max_radiance                     | MRI_IPSI-MRI_CONTRA-WEIGHT-NS-BLI_max_flux                  | 0.7731 | 0.0285 |
| MRI_IPSI-MRI_CONTRA-NS                      | Day_nr-WEIGHT-BLI_max_flux-BLI_max_radiance                 | 0.7731 | 0.0256 |
| MRI_IPSI-WEIGHT-BLI_max_radiance            | Day_nr-MRI_CONTRA-NS-BLI_max_flux                           | 0.7729 | 0.0333 |
| Day_nr                                      | MRI_IPSI-MRI_CONTRA-WEIGHT-NS-BLI_max_flux-BLI_max_radiance | 0.7720 | 0.0399 |
| MRI_CONTRA-NS                               | Day_nr-MRI_IPSI-WEIGHT-BLI_max_flux-BLI_max_radiance        | 0.7717 | 0.0322 |
| WEIGHT-BLI_max_radiance                     | Day_nr-MRI_IPSI-MRI_CONTRA-NS-BLI_max_flux                  | 0.7687 | 0.0340 |
| Day_nr-MRI_CONTRA-BLI_max_radiance          | MRI_IPSI-WEIGHT-NS-BLI_max_flux                             | 0.7671 | 0.0383 |
| BLI_max_flux                                | Day_nr-MRI_IPSI-MRI_CONTRA-WEIGHT-NS-BLI_max_radiance       | 0.7658 | 0.0388 |
| MRI_CONTRA-                                 | Day_nr-MRI_IPSI-WEIGHT-                                     | 0.7650 | 0.0360 |

|                                                                             |                                                              |        |        |
|-----------------------------------------------------------------------------|--------------------------------------------------------------|--------|--------|
| BLI_max_flux                                                                | NS-BLI_max_radiance                                          |        |        |
| Day_nr-MRI_CONTRA                                                           | MRI_IPSI-WEIGHT-NS-<br>BLI_max_flux-<br>BLI_max_radiance     | 0.7649 | 0.0360 |
| WEIGHT-BLI_max_flux                                                         | Day_nr-MRI_IPSI-<br>MRI_CONTRA-NS-<br>BLI_max_radiance       | 0.7644 | 0.0370 |
| MRI_IPSI-MRI_CONTRA-<br>BLI_max_flux                                        | Day_nr-WEIGHT-NS-<br>BLI_max_radiance                        | 0.7644 | 0.0357 |
| Day_nr-WEIGHT                                                               | MRI_IPSI-MRI_CONTRA-<br>NS-BLI_max_flux-<br>BLI_max_radiance | 0.7631 | 0.0288 |
| MRI_IPSI-BLI_max_flux                                                       | Day_nr-MRI_CONTRA-<br>WEIGHT-NS-<br>BLI_max_radiance         | 0.7618 | 0.0338 |
| Day_nr-WEIGHT-<br>BLI_max_radiance                                          | MRI_IPSI-MRI_CONTRA-<br>NS-BLI_max_flux                      | 0.7612 | 0.0290 |
| Day_nr-MRI_IPSI-<br>MRI_CONTRA-WEIGHT-<br>BLI_max_flux-<br>BLI_max_radiance | NS                                                           | 0.7601 | 0.0343 |
| Day_nr-MRI_IPSI-WEIGHT                                                      | MRI_CONTRA-NS-<br>BLI_max_flux-<br>BLI_max_radiance          | 0.7597 | 0.0292 |
| MRI_IPSI-MRI_CONTRA-<br>WEIGHT-NS-<br>BLI_max_radiance                      | Day_nr-BLI_max_flux                                          | 0.7593 | 0.0239 |
| NS-BLI_max_radiance                                                         | Day_nr-MRI_IPSI-<br>MRI_CONTRA-WEIGHT-<br>BLI_max_flux       | 0.7586 | 0.0217 |
| MRI_IPSI-WEIGHT-<br>BLI_max_flux                                            | Day_nr-MRI_CONTRA-NS-<br>BLI_max_radiance                    | 0.7570 | 0.0485 |
| MRI_IPSI-NS-<br>BLI_max_radiance                                            | Day_nr-MRI_CONTRA-<br>WEIGHT-BLI_max_flux                    | 0.7558 | 0.0249 |

|                                           |                                                          |        |        |
|-------------------------------------------|----------------------------------------------------------|--------|--------|
| MRI_IPSI-WEIGHT-NS-BLI_max_flux           | Day_nr-MRI_CONTRA-BLI_max_radiance                       | 0.7552 | 0.0598 |
| Day_nr-MRI_CONTRA-WEIGHT-BLI_max_radiance | MRI_IPSI-NS-BLI_max_flux                                 | 0.7511 | 0.0271 |
| Day_nr-MRI_CONTRA-WEIGHT                  | MRI_IPSI-NS-BLI_max_flux-BLI_max_radiance                | 0.7503 | 0.0338 |
| MRI_CONTRA-NS-BLI_max_radiance            | Day_nr-MRI_IPSI-WEIGHT-BLI_max_flux                      | 0.7497 | 0.0298 |
| MRI_IPSI-MRI_CONTRA-NS-BLI_max_radiance   | Day_nr-WEIGHT-BLI_max_flux                               | 0.7493 | 0.0303 |
| Day_nr-MRI_IPSI-MRI_CONTRA-WEIGHT         | NS-BLI_max_flux-BLI_max_radiance                         | 0.7457 | 0.0380 |
| Day_nr-MRI_CONTRA-BLI_max_flux            | MRI_IPSI-WEIGHT-NS-BLI_max_radiance                      | 0.7456 | 0.0379 |
| WEIGHT-NS-BLI_max_flux                    | Day_nr-MRI_IPSI-MRI_CONTRA-BLI_max_radiance              | 0.7434 | 0.0422 |
| Day_nr-NS                                 | MRI_IPSI-MRI_CONTRA-WEIGHT-BLI_max_flux-BLI_max_radiance | 0.7413 | 0.0315 |
| Day_nr-MRI_CONTRA-NS-BLI_max_radiance     | MRI_IPSI-WEIGHT-BLI_max_flux                             | 0.7408 | 0.0308 |
| MRI_CONTRA-NS-BLI_max_flux                | Day_nr-MRI_IPSI-WEIGHT-BLI_max_radiance                  | 0.7397 | 0.0222 |
| Day_nr-MRI_CONTRA-NS                      | MRI_IPSI-WEIGHT-BLI_max_flux-BLI_max_radiance            | 0.7394 | 0.0333 |
| Day_nr-NS-BLI_max_radiance                | MRI_IPSI-MRI_CONTRA-WEIGHT-BLI_max_flux                  | 0.7360 | 0.0244 |
| Day_nr-MRI_CONTRA-WEIGHT-BLI_max_flux     | MRI_IPSI-NS-BLI_max_radiance                             | 0.7360 | 0.0395 |
| Day_nr-MRI_IPSI-MRI_CONTRA                | WEIGHT-NS-BLI_max_flux-BLI_max_radiance                  | 0.7341 | 0.0462 |

|                                                       |                                                    |        |        |
|-------------------------------------------------------|----------------------------------------------------|--------|--------|
| Day_nr-WEIGHT-NS                                      | MRI_IPSI-MRI_CONTRA-BLI_max_flux-BLI_max_radiance  | 0.7333 | 0.0305 |
| Day_nr-MRI_IPSI                                       | MRI_CONTRA-WEIGHT-NS-BLI_max_flux-BLI_max_radiance | 0.7325 | 0.0431 |
| Day_nr-MRI_CONTRA-WEIGHT-NS                           | MRI_IPSI-BLI_max_flux-BLI_max_radiance             | 0.7306 | 0.0357 |
| MRI_CONTRA-WEIGHT-NS-BLI_max_radiance                 | Day_nr-MRI_IPSI-BLI_max_flux                       | 0.7296 | 0.0302 |
| Day_nr-MRI_IPSI-MRI_CONTRA-WEIGHT-NS-BLI_max_radiance | BLI_max_flux                                       | 0.7283 | 0.0211 |
| Day_nr-BLI_max_flux                                   | MRI_IPSI-MRI_CONTRA-WEIGHT-NS-BLI_max_radiance     | 0.7275 | 0.0381 |
| NS-BLI_max_flux                                       | Day_nr-MRI_IPSI-MRI_CONTRA-WEIGHT-BLI_max_radiance | 0.7266 | 0.0404 |
| Day_nr-MRI_IPSI-WEIGHT-NS                             | MRI_CONTRA-BLI_max_flux-BLI_max_radiance           | 0.7266 | 0.0309 |
| Day_nr-WEIGHT-NS-BLI_max_radiance                     | MRI_IPSI-MRI_CONTRA-BLI_max_flux                   | 0.7265 | 0.0261 |
| WEIGHT-NS-BLI_max_radiance                            | Day_nr-MRI_IPSI-MRI_CONTRA-BLI_max_flux            | 0.7259 | 0.0308 |
| Day_nr-WEIGHT-BLI_max_flux                            | MRI_IPSI-MRI_CONTRA-NS-BLI_max_radiance            | 0.7258 | 0.0353 |
| Day_nr-MRI_IPSI-MRI_CONTRA-WEIGHT-BLI_max_flux        | NS-BLI_max_radiance                                | 0.7234 | 0.0398 |
| Day_nr-MRI_IPSI-MRI_CONTRA-NS                         | WEIGHT-BLI_max_flux-BLI_max_radiance               | 0.7232 | 0.0301 |

|                                                                  |                                          |        |        |
|------------------------------------------------------------------|------------------------------------------|--------|--------|
| BLI_max_flux-<br>BLI_max_radiance                                | Day_nr-MRI_IPSI-<br>MRI_CONTRA-WEIGHT-NS | 0.7219 | 0.0358 |
| Day_nr-MRI_CONTRA-<br>WEIGHT-NS-<br>BLI_max_radiance             | MRI_IPSI-BLI_max_flux                    | 0.7208 | 0.0328 |
| Day_nr-MRI_IPSI-<br>MRI_CONTRA-NS-<br>BLI_max_radiance           | WEIGHT-BLI_max_flux                      | 0.7205 | 0.0459 |
| MRI_CONTRA-<br>BLI_max_flux-<br>BLI_max_radiance                 | Day_nr-MRI_IPSI-WEIGHT-<br>NS            | 0.7203 | 0.0348 |
| Day_nr-MRI_IPSI-<br>MRI_CONTRA-WEIGHT-<br>NS                     | BLI_max_flux-<br>BLI_max_radiance        | 0.7200 | 0.0310 |
| MRI_IPSI-WEIGHT-NS-<br>BLI_max_radiance                          | Day_nr-MRI_CONTRA-<br>BLI_max_flux       | 0.7199 | 0.0311 |
| Day_nr-MRI_IPSI-WEIGHT-<br>BLI_max_flux                          | MRI_CONTRA-NS-<br>BLI_max_radiance       | 0.7184 | 0.0305 |
| MRI_IPSI-MRI_CONTRA-<br>WEIGHT-BLI_max_flux-<br>BLI_max_radiance | Day_nr-NS                                | 0.7168 | 0.0269 |
| Day_nr-MRI_IPSI-<br>MRI_CONTRA-<br>BLI_max_flux                  | WEIGHT-NS-<br>BLI_max_radiance           | 0.7161 | 0.0233 |
| MRI_CONTRA-WEIGHT-<br>BLI_max_flux-<br>BLI_max_radiance          | Day_nr-MRI_IPSI-NS                       | 0.7159 | 0.0386 |
| Day_nr-MRI_IPSI-<br>MRI_CONTRA-WEIGHT-<br>NS-BLI_max_flux        | BLI_max_radiance                         | 0.7158 | 0.0226 |
| WEIGHT-BLI_max_flux-<br>BLI_max_radiance                         | Day_nr-MRI_IPSI-<br>MRI_CONTRA-NS        | 0.7146 | 0.0431 |
| Day_nr-WEIGHT-<br>BLI_max_flux-<br>BLI_max_radiance              | MRI_IPSI-MRI_CONTRA-<br>NS               | 0.7125 | 0.0391 |

|                                                        |                                                 |        |        |
|--------------------------------------------------------|-------------------------------------------------|--------|--------|
| Day_nr-MRI_CONTRA-WEIGHT-BLI_max_flux-BLI_max_radiance | MRI_IPSI-NS                                     | 0.7104 | 0.0356 |
| Day_nr-MRI_IPSI-WEIGHT-NS-BLI_max_radiance             | MRI_CONTRA-BLI_max_flux                         | 0.7096 | 0.0437 |
| MRI_IPSI-WEIGHT-BLI_max_flux-BLI_max_radiance          | Day_nr-MRI_CONTRA-NS                            | 0.7085 | 0.0334 |
| Day_nr-MRI_IPSI-BLI_max_radiance                       | MRI_CONTRA-WEIGHT-NS-BLI_max_flux               | 0.7073 | 0.0599 |
| Day_nr-MRI_CONTRA-BLI_max_flux-BLI_max_radiance        | MRI_IPSI-WEIGHT-NS                              | 0.7070 | 0.0365 |
| MRI_IPSI-BLI_max_flux-BLI_max_radiance                 | Day_nr-MRI_CONTRA-WEIGHT-NS                     | 0.6996 | 0.0369 |
| Day_nr-MRI_IPSI-NS                                     | MRI_CONTRA-WEIGHT-BLI_max_flux-BLI_max_radiance | 0.6972 | 0.0399 |
| MRI_IPSI-MRI_CONTRA-NS-BLI_max_flux                    | Day_nr-WEIGHT-BLI_max_radiance                  | 0.6971 | 0.0552 |
| MRI_IPSI-MRI_CONTRA-BLI_max_flux-BLI_max_radiance      | Day_nr-WEIGHT-NS                                | 0.6947 | 0.0347 |
| Day_nr-BLI_max_flux-BLI_max_radiance                   | MRI_IPSI-MRI_CONTRA-WEIGHT-NS                   | 0.6917 | 0.0440 |
| Day_nr-MRI_CONTRA-NS-BLI_max_flux                      | MRI_IPSI-WEIGHT-BLI_max_radiance                | 0.6917 | 0.0325 |
| Day_nr-MRI_IPSI-WEIGHT-NS-BLI_max_flux                 | MRI_CONTRA-BLI_max_radiance                     | 0.6840 | 0.0695 |
| Day_nr-MRI_CONTRA-WEIGHT-NS-BLI_max_flux               | MRI_IPSI-BLI_max_radiance                       | 0.6822 | 0.0349 |
| Day_nr-WEIGHT-NS-BLI_max_flux                          | MRI_IPSI-MRI_CONTRA-BLI_max_radiance            | 0.6790 | 0.0543 |
| Day_nr-MRI_IPSI-NS-                                    | MRI_CONTRA-WEIGHT-                              | 0.6735 | 0.0421 |



|                                                          |                                             |        |        |
|----------------------------------------------------------|---------------------------------------------|--------|--------|
| BLI_max_radiance                                         | BLI_max_flux                                |        |        |
| Day_nr-NS-BLI_max_flux                                   | MRI_IPSI-MRI_CONTRA-WEIGHT-BLI_max_radiance | 0.6709 | 0.0380 |
| MRI_IPSI-NS-BLI_max_flux                                 | Day_nr-MRI_CONTRA-WEIGHT-BLI_max_radiance   | 0.6697 | 0.0513 |
| Day_nr-MRI_IPSI-BLI_max_flux                             | MRI_CONTRA-WEIGHT-NS-BLI_max_radiance       | 0.6678 | 0.0312 |
| MRI_CONTRA-NS-BLI_max_flux-BLI_max_radiance              | Day_nr-MRI_IPSI-WEIGHT                      | 0.6628 | 0.0301 |
| NS-BLI_max_flux-BLI_max_radiance                         | Day_nr-MRI_IPSI-MRI_CONTRA-WEIGHT           | 0.6581 | 0.0338 |
| Day_nr-MRI_IPSI-WEIGHT-BLI_max_flux-BLI_max_radiance     | MRI_CONTRA-NS                               | 0.6528 | 0.0697 |
| Day_nr-MRI_IPSI-NS-BLI_max_flux                          | MRI_CONTRA-WEIGHT-BLI_max_radiance          | 0.6455 | 0.0318 |
| Day_nr-MRI_IPSI-BLI_max_flux-BLI_max_radiance            | MRI_CONTRA-WEIGHT-NS                        | 0.6434 | 0.0324 |
| Day_nr-MRI_IPSI-MRI_CONTRA-NS-BLI_max_flux               | WEIGHT-BLI_max_radiance                     | 0.6391 | 0.0312 |
| Day_nr-MRI_CONTRA-NS-BLI_max_flux-BLI_max_radiance       | MRI_IPSI-WEIGHT                             | 0.6370 | 0.0405 |
| Day_nr-MRI_IPSI-MRI_CONTRA-BLI_max_flux-BLI_max_radiance | WEIGHT-NS                                   | 0.6342 | 0.0361 |
| Day_nr-NS-BLI_max_flux-BLI_max_radiance                  | MRI_IPSI-MRI_CONTRA-WEIGHT                  | 0.6336 | 0.0342 |
| Day_nr-MRI_CONTRA-WEIGHT-NS-BLI_max_flux-                | MRI_IPSI                                    | 0.6297 | 0.0355 |

|                                                                         |                                |        |        |
|-------------------------------------------------------------------------|--------------------------------|--------|--------|
| BLI_max_radiance                                                        |                                |        |        |
| MRI_IPSI-NS-<br>BLI_max_flux-<br>BLI_max_radiance                       | Day_nr-MRI_CONTRA-<br>WEIGHT   | 0.6263 | 0.0339 |
| Day_nr-MRI_IPSI-NS-<br>BLI_max_flux-<br>BLI_max_radiance                | MRI_CONTRA-WEIGHT              | 0.6234 | 0.0304 |
| MRI_CONTRA-WEIGHT-<br>NS-BLI_max_flux-<br>BLI_max_radiance              | Day_nr-MRI_IPSI                | 0.6228 | 0.0289 |
| MRI_IPSI-MRI_CONTRA-<br>NS-BLI_max_flux-<br>BLI_max_radiance            | Day_nr-WEIGHT                  | 0.6023 | 0.0188 |
| WEIGHT-NS-BLI_max_flux-<br>BLI_max_radiance                             | Day_nr-MRI_IPSI-<br>MRI_CONTRA | 0.5983 | 0.0441 |
| Day_nr-WEIGHT-NS-<br>BLI_max_flux-<br>BLI_max_radiance                  | MRI_IPSI-MRI_CONTRA            | 0.5846 | 0.0350 |
| Day_nr-MRI_IPSI-<br>MRI_CONTRA-NS-<br>BLI_max_flux-<br>BLI_max_radiance | WEIGHT                         | 0.5824 | 0.0152 |
| MRI_IPSI-WEIGHT-NS-<br>BLI_max_flux-<br>BLI_max_radiance                | Day_nr-MRI_CONTRA              | 0.5786 | 0.0183 |
| Day_nr-MRI_IPSI-WEIGHT-<br>NS-BLI_max_flux-<br>BLI_max_radiance         | MRI_CONTRA                     | 0.5766 | 0.0154 |
| MRI_IPSI-MRI_CONTRA-<br>WEIGHT-NS-BLI_max_flux-<br>BLI_max_radiance     | Day_nr                         | 0.3136 | 0.2362 |

ANN - artificial neural network; SPL-sham - sham-operated mice group; SD - standard deviation; MRI\_CONTRA - volume of the contralateral hemisphere measured by MRI; MRI\_IPSI - volume of the ipsilateral hemisphere measured by MRI; BLI\_max\_radiance - area of peak radiation measured by bioluminescence method; BLI\_max\_flux - area of peak growth

measured by bioluminescence method; WEIGHT - animal weight; Day\_nr - day from the middle carotid artery occlusion (MCAO) procedure; NS - scoring of phenotypic neurological assessment.
