# Supplementary material for: Innovative statistical approaches: the use of neural networks reduces the sample size in the splenectomy-MCAO mouse model
Source: PubMed Central journal article supplement (PMC11074938; doi:10.3325/cmj.2024.65.122), 2024-04
Supplement: CroatMedJ_65_s004.pdf [file CroatMedJ_65_s004.pdf]

**Supplemental Table 4.** Prediction accuracy of ANN class SPLX depending on the exclusion of variables and their combinations. The ANN was trained using a dataset containing all days after the stroke, except the 2nd day. Values in the table are sorted based on the mean accuracy prediction of class SPLX.

| “Out” variable      | “In” variable                                                      | The mean accuracy value of ANN predictions for the SPLX class. | SD of accuracy in predictions for the ANN SPLX class. |
|---------------------|--------------------------------------------------------------------|----------------------------------------------------------------|-------------------------------------------------------|
| None                | Day_nr-MRI_IPSI-MRI_CONTRA-WEIGHT-NS-BLI_max_flux-BLI_max_radiance | 0.8485                                                         | 0.0254                                                |
| MRI_IPSI            | Day_nr-MRI_CONTRA-WEIGHT-NS-BLI_max_flux-BLI_max_radiance          | 0.8474                                                         | 0.0214                                                |
| MRI_CONTRA          | Day_nr-MRI_IPSI-WEIGHT-NS-BLI_max_flux-BLI_max_radiance            | 0.8459                                                         | 0.0257                                                |
| MRI_IPSI-MRI_CONTRA | Day_nr-WEIGHT-NS-BLI_max_flux-BLI_max_radiance                     | 0.8360                                                         | 0.0253                                                |
| NS                  | Day_nr-MRI_IPSI-MRI_CONTRA-WEIGHT-BLI_max_flux-BLI_max_radiance    | 0.8334                                                         | 0.0317                                                |
| WEIGHT              | Day_nr-MRI_IPSI-MRI_CONTRA-NS-BLI_max_flux-BLI_max_radiance        | 0.8319                                                         | 0.0284                                                |
| MRI_IPSI-WEIGHT     | Day_nr-MRI_CONTRA-NS-BLI_max_flux-BLI_max_radiance                 | 0.8300                                                         | 0.0218                                                |
| MRI_IPSI-NS         | Day_nr-MRI_CONTRA-                                                 | 0.8289                                                         | 0.0281                                                |

|                                          |                                                               |        |        |
|------------------------------------------|---------------------------------------------------------------|--------|--------|
|                                          | WEIGHT-BLI_max_flux-<br>BLI_max_radiance                      |        |        |
| MRI_CONTRA-NS                            | Day_nr-MRI_IPSI-WEIGHT-<br>BLI_max_flux-<br>BLI_max_radiance  | 0.8274 | 0.0280 |
| MRI_IPSI-MRI_CONTRA-<br>NS               | Day_nr-WEIGHT-<br>BLI_max_flux-<br>BLI_max_radiance           | 0.8203 | 0.0244 |
| MRI_CONTRA-WEIGHT                        | Day_nr-MRI_IPSI-NS-<br>BLI_max_flux-<br>BLI_max_radiance      | 0.8160 | 0.0244 |
| MRI_IPSI-<br>BLI_max_radiance            | Day_nr-MRI_CONTRA-<br>WEIGHT-NS-BLI_max_flux                  | 0.8159 | 0.0275 |
| BLI_max_radiance                         | Day_nr-MRI_IPSI-<br>MRI_CONTRA-WEIGHT-<br>NS-BLI_max_flux     | 0.8158 | 0.0224 |
| BLI_max_flux                             | Day_nr-MRI_IPSI-<br>MRI_CONTRA-WEIGHT-<br>NS-BLI_max_radiance | 0.8125 | 0.0341 |
| MRI_IPSI-MRI_CONTRA-<br>WEIGHT           | Day_nr-NS-BLI_max_flux-<br>BLI_max_radiance                   | 0.8124 | 0.0221 |
| MRI_CONTRA-<br>BLI_max_flux              | Day_nr-MRI_IPSI-WEIGHT-<br>NS-BLI_max_radiance                | 0.8096 | 0.0302 |
| MRI_IPSI-MRI_CONTRA-<br>BLI_max_radiance | Day_nr-WEIGHT-NS-<br>BLI_max_flux                             | 0.8084 | 0.0258 |
| NS-BLI_max_radiance                      | Day_nr-MRI_IPSI-<br>MRI_CONTRA-WEIGHT-<br>BLI_max_flux        | 0.8057 | 0.0263 |
| MRI_IPSI-BLI_max_flux                    | Day_nr-MRI_CONTRA-<br>WEIGHT-NS-<br>BLI_max_radiance          | 0.8023 | 0.0308 |
| MRI_CONTRA-<br>BLI_max_radiance          | Day_nr-MRI_IPSI-WEIGHT-<br>NS-BLI_max_flux                    | 0.7990 | 0.0271 |
| WEIGHT-NS                                | Day_nr-MRI_IPSI-                                              | 0.7985 | 0.0288 |

|                                         |                                                             |        |        |
|-----------------------------------------|-------------------------------------------------------------|--------|--------|
|                                         | MRI_CONTRA-BLI_max_flux-BLI_max_radiance                    |        |        |
| MRI_IPSI-NS-BLI_max_radiance            | Day_nr-MRI_CONTRA-WEIGHT-BLI_max_flux                       | 0.7982 | 0.0283 |
| MRI_IPSI-WEIGHT-NS                      | Day_nr-MRI_CONTRA-BLI_max_flux-BLI_max_radiance             | 0.7936 | 0.0208 |
| MRI_CONTRA-NS-BLI_max_radiance          | Day_nr-MRI_IPSI-WEIGHT-BLI_max_flux                         | 0.7930 | 0.0325 |
| MRI_IPSI-MRI_CONTRA-BLI_max_flux        | Day_nr-WEIGHT-NS-BLI_max_radiance                           | 0.7924 | 0.0334 |
| WEIGHT-BLI_max_radiance                 | Day_nr-MRI_IPSI-MRI_CONTRA-NS-BLI_max_flux                  | 0.7910 | 0.0268 |
| MRI_CONTRA-WEIGHT-NS                    | Day_nr-MRI_IPSI-BLI_max_flux-BLI_max_radiance               | 0.7890 | 0.0264 |
| MRI_IPSI-WEIGHT-BLI_max_radiance        | Day_nr-MRI_CONTRA-NS-BLI_max_flux                           | 0.7872 | 0.0204 |
| Day_nr-BLI_max_radiance                 | MRI_IPSI-MRI_CONTRA-WEIGHT-NS-BLI_max_flux                  | 0.7848 | 0.0313 |
| MRI_IPSI-MRI_CONTRA-WEIGHT-NS           | Day_nr-BLI_max_flux-BLI_max_radiance                        | 0.7848 | 0.0251 |
| NS-BLI_max_flux                         | Day_nr-MRI_IPSI-MRI_CONTRA-WEIGHT-BLI_max_radiance          | 0.7847 | 0.0359 |
| Day_nr                                  | MRI_IPSI-MRI_CONTRA-WEIGHT-NS-BLI_max_flux-BLI_max_radiance | 0.7843 | 0.0241 |
| MRI_IPSI-MRI_CONTRA-NS-BLI_max_radiance | Day_nr-WEIGHT-BLI_max_flux                                  | 0.7802 | 0.0280 |
| Day_nr-MRI_IPSI-NS-BLI_max_flux         | MRI_CONTRA-WEIGHT-BLI_max_radiance                          | 0.7759 | 0.0335 |

|                                      |                                                          |        |        |
|--------------------------------------|----------------------------------------------------------|--------|--------|
| Day_nr-NS                            | MRI_IPSI-MRI_CONTRA-WEIGHT-BLI_max_flux-BLI_max_radiance | 0.7746 | 0.0262 |
| Day_nr-MRI_IPSI-BLI_max_flux         | MRI_CONTRA-WEIGHT-NS-BLI_max_radiance                    | 0.7745 | 0.0391 |
| Day_nr-BLI_max_flux                  | MRI_IPSI-MRI_CONTRA-WEIGHT-NS-BLI_max_radiance           | 0.7714 | 0.0264 |
| MRI_CONTRA-NS-BLI_max_flux           | Day_nr-MRI_IPSI-WEIGHT-BLI_max_radiance                  | 0.7711 | 0.0385 |
| MRI_IPSI-WEIGHT-BLI_max_flux         | Day_nr-MRI_CONTRA-NS-BLI_max_radiance                    | 0.7702 | 0.0237 |
| MRI_IPSI-NS-BLI_max_flux             | Day_nr-MRI_CONTRA-WEIGHT-BLI_max_radiance                | 0.7700 | 0.0327 |
| WEIGHT-BLI_max_flux                  | Day_nr-MRI_IPSI-MRI_CONTRA-NS-BLI_max_radiance           | 0.7697 | 0.0339 |
| MRI_CONTRA-WEIGHT-BLI_max_flux       | Day_nr-MRI_IPSI-NS-BLI_max_radiance                      | 0.7689 | 0.0217 |
| MRI_CONTRA-WEIGHT-NS-BLI_max_flux    | Day_nr-MRI_IPSI-BLI_max_radiance                         | 0.7676 | 0.0316 |
| Day_nr-WEIGHT                        | MRI_IPSI-MRI_CONTRA-NS-BLI_max_flux-BLI_max_radiance     | 0.7650 | 0.0227 |
| Day_nr-BLI_max_flux-BLI_max_radiance | MRI_IPSI-MRI_CONTRA-WEIGHT-NS                            | 0.7648 | 0.0432 |
| Day_nr-MRI_CONTRA                    | MRI_IPSI-WEIGHT-NS-BLI_max_flux-BLI_max_radiance         | 0.7638 | 0.0265 |
| BLI_max_flux-BLI_max_radiance        | Day_nr-MRI_IPSI-MRI_CONTRA-WEIGHT-NS                     | 0.7610 | 0.0352 |
| Day_nr-NS-BLI_max_radiance           | MRI_IPSI-MRI_CONTRA-WEIGHT-BLI_max_flux                  | 0.7604 | 0.0312 |
| Day_nr-MRI_CONTRA-                   | MRI_IPSI-WEIGHT-NS-                                      | 0.7584 | 0.0252 |

|                                                         |                                               |        |        |
|---------------------------------------------------------|-----------------------------------------------|--------|--------|
| BLI_max_radiance                                        | BLI_max_flux                                  |        |        |
| MRI_IPSI-MRI_CONTRA-WEIGHT-BLI_max_flux                 | Day_nr-NS-BLI_max_radiance                    | 0.7582 | 0.0254 |
| WEIGHT-NS-BLI_max_flux                                  | Day_nr-MRI_IPSI-MRI_CONTRA-BLI_max_radiance   | 0.7556 | 0.0617 |
| Day_nr-MRI_IPSI-BLI_max_flux-BLI_max_radiance           | MRI_CONTRA-WEIGHT-NS                          | 0.7553 | 0.0323 |
| Day_nr-MRI_CONTRA-NS                                    | MRI_IPSI-WEIGHT-BLI_max_flux-BLI_max_radiance | 0.7552 | 0.0283 |
| Day_nr-NS-BLI_max_flux                                  | MRI_IPSI-MRI_CONTRA-WEIGHT-BLI_max_radiance   | 0.7521 | 0.0292 |
| WEIGHT-NS-BLI_max_radiance                              | Day_nr-MRI_IPSI-MRI_CONTRA-BLI_max_flux       | 0.7493 | 0.0309 |
| MRI_IPSI-WEIGHT-NS-BLI_max_flux                         | Day_nr-MRI_CONTRA-BLI_max_radiance            | 0.7480 | 0.0365 |
| Day_nr-WEIGHT-BLI_max_radiance                          | MRI_IPSI-MRI_CONTRA-NS-BLI_max_flux           | 0.7473 | 0.0328 |
| MRI_IPSI-MRI_CONTRA-WEIGHT-BLI_max_radiance             | Day_nr-NS-BLI_max_flux                        | 0.7467 | 0.0274 |
| Day_nr-MRI_IPSI-BLI_max_radiance                        | MRI_CONTRA-WEIGHT-NS-BLI_max_flux             | 0.7460 | 0.0547 |
| Day_nr-MRI_IPSI-NS-BLI_max_radiance                     | MRI_CONTRA-WEIGHT-BLI_max_flux                | 0.7460 | 0.0523 |
| Day_nr-MRI_IPSI-WEIGHT-NS-BLI_max_flux-BLI_max_radiance | MRI_CONTRA                                    | 0.7453 | 0.0355 |
| MRI_CONTRA-WEIGHT-BLI_max_radiance                      | Day_nr-MRI_IPSI-NS-BLI_max_flux               | 0.7448 | 0.0281 |
| MRI_IPSI-BLI_max_flux-                                  | Day_nr-MRI_CONTRA-                            | 0.7441 | 0.0330 |

|                                                  |                                                    |        |        |
|--------------------------------------------------|----------------------------------------------------|--------|--------|
| BLI_max_radiance                                 | WEIGHT-NS                                          |        |        |
| Day_nr-MRI_IPSI-NS-BLI_max_flux-BLI_max_radiance | MRI_CONTRA-WEIGHT                                  | 0.7424 | 0.0308 |
| Day_nr-MRI_IPSI                                  | MRI_CONTRA-WEIGHT-NS-BLI_max_flux-BLI_max_radiance | 0.7408 | 0.0418 |
| Day_nr-MRI_IPSI-NS                               | MRI_CONTRA-WEIGHT-BLI_max_flux-BLI_max_radiance    | 0.7406 | 0.0369 |
| Day_nr-MRI_CONTRA-BLI_max_flux                   | MRI_IPSI-WEIGHT-NS-BLI_max_radiance                | 0.7401 | 0.0306 |
| MRI_IPSI-WEIGHT-NS-BLI_max_radiance              | Day_nr-MRI_CONTRA-BLI_max_flux                     | 0.7400 | 0.0432 |
| Day_nr-MRI_CONTRA-NS-BLI_max_radiance            | MRI_IPSI-WEIGHT-BLI_max_flux                       | 0.7388 | 0.0294 |
| MRI_IPSI-MRI_CONTRA-NS-BLI_max_flux              | Day_nr-WEIGHT-BLI_max_radiance                     | 0.7341 | 0.0399 |
| Day_nr-MRI_CONTRA-WEIGHT                         | MRI_IPSI-NS-BLI_max_flux-BLI_max_radiance          | 0.7338 | 0.0247 |
| MRI_IPSI-MRI_CONTRA-WEIGHT-NS-BLI_max_flux       | Day_nr-BLI_max_radiance                            | 0.7330 | 0.0440 |
| Day_nr-NS-BLI_max_flux-BLI_max_radiance          | MRI_IPSI-MRI_CONTRA-WEIGHT                         | 0.7328 | 0.0393 |
| Day_nr-WEIGHT-NS                                 | MRI_IPSI-MRI_CONTRA-BLI_max_flux-BLI_max_radiance  | 0.7316 | 0.0238 |
| MRI_CONTRA-BLI_max_flux-BLI_max_radiance         | Day_nr-MRI_IPSI-WEIGHT-NS                          | 0.7310 | 0.0328 |
| Day_nr-MRI_IPSI-WEIGHT-NS-BLI_max_flux           | MRI_CONTRA-BLI_max_radiance                        | 0.7276 | 0.0317 |
| MRI_IPSI-NS-BLI_max_flux-                        | Day_nr-MRI_CONTRA-WEIGHT                           | 0.7250 | 0.0283 |

|                                                                         |                                             |        |        |
|-------------------------------------------------------------------------|---------------------------------------------|--------|--------|
| BLI_max_radiance                                                        |                                             |        |        |
| NS-BLI_max_flux-<br>BLI_max_radiance                                    | Day_nr-MRI_IPSI-<br>MRI_CONTRA-WEIGHT       | 0.7245 | 0.0276 |
| Day_nr-WEIGHT-<br>BLI_max_flux                                          | MRI_IPSI-MRI_CONTRA-<br>NS-BLI_max_radiance | 0.7227 | 0.0286 |
| Day_nr-MRI_CONTRA-<br>WEIGHT-<br>BLI_max_radiance                       | MRI_IPSI-NS-BLI_max_flux                    | 0.7218 | 0.0246 |
| Day_nr-MRI_IPSI-<br>MRI_CONTRA-NS-<br>BLI_max_flux                      | WEIGHT-BLI_max_radiance                     | 0.7204 | 0.0401 |
| Day_nr-WEIGHT-NS-<br>BLI_max_radiance                                   | MRI_IPSI-MRI_CONTRA-<br>BLI_max_flux        | 0.7199 | 0.0338 |
| Day_nr-MRI_CONTRA-NS-<br>BLI_max_flux                                   | MRI_IPSI-WEIGHT-<br>BLI_max_radiance        | 0.7197 | 0.0267 |
| MRI_IPSI-WEIGHT-NS-<br>BLI_max_flux-<br>BLI_max_radiance                | Day_nr-MRI_CONTRA                           | 0.7169 | 0.0401 |
| WEIGHT-BLI_max_flux-<br>BLI_max_radiance                                | Day_nr-MRI_IPSI-<br>MRI_CONTRA-NS           | 0.7167 | 0.0324 |
| Day_nr-MRI_CONTRA-<br>WEIGHT-NS                                         | MRI_IPSI-BLI_max_flux-<br>BLI_max_radiance  | 0.7119 | 0.0226 |
| MRI_IPSI-MRI_CONTRA-<br>BLI_max_flux-<br>BLI_max_radiance               | Day_nr-WEIGHT-NS                            | 0.7103 | 0.0205 |
| Day_nr-MRI_IPSI-<br>MRI_CONTRA-NS-<br>BLI_max_flux-<br>BLI_max_radiance | WEIGHT                                      | 0.7064 | 0.0314 |
| MRI_IPSI-MRI_CONTRA-<br>WEIGHT-NS-<br>BLI_max_radiance                  | Day_nr-BLI_max_flux                         | 0.7047 | 0.0325 |
| MRI_CONTRA-WEIGHT-<br>NS-BLI_max_radiance                               | Day_nr-MRI_IPSI-<br>BLI_max_flux            | 0.7042 | 0.0307 |

|                                                      |                                      |        |        |
|------------------------------------------------------|--------------------------------------|--------|--------|
| Day_nr-MRI_CONTRA-BLI_max_flux-BLI_max_radiance      | MRI_IPSI-WEIGHT-NS                   | 0.7030 | 0.0324 |
| Day_nr-WEIGHT-BLI_max_flux-BLI_max_radiance          | MRI_IPSI-MRI_CONTRA-NS               | 0.6991 | 0.0393 |
| Day_nr-MRI_CONTRA-WEIGHT-BLI_max_flux                | MRI_IPSI-NS-BLI_max_radiance         | 0.6975 | 0.0314 |
| Day_nr-WEIGHT-NS-BLI_max_flux                        | MRI_IPSI-MRI_CONTRA-BLI_max_radiance | 0.6913 | 0.0325 |
| MRI_CONTRA-NS-BLI_max_flux-BLI_max_radiance          | Day_nr-MRI_IPSI-WEIGHT               | 0.6913 | 0.0245 |
| Day_nr-MRI_IPSI-MRI_CONTRA-NS-BLI_max_radiance       | WEIGHT-BLI_max_flux                  | 0.6889 | 0.0437 |
| MRI_IPSI-WEIGHT-BLI_max_flux-BLI_max_radiance        | Day_nr-MRI_CONTRA-NS                 | 0.6873 | 0.0253 |
| MRI_IPSI-MRI_CONTRA-NS-BLI_max_flux-BLI_max_radiance | Day_nr-WEIGHT                        | 0.6821 | 0.0286 |
| Day_nr-MRI_CONTRA-WEIGHT-NS-BLI_max_radiance         | MRI_IPSI-BLI_max_flux                | 0.6812 | 0.0285 |
| Day_nr-MRI_CONTRA-NS-BLI_max_flux-BLI_max_radiance   | MRI_IPSI-WEIGHT                      | 0.6807 | 0.0326 |
| Day_nr-MRI_IPSI-MRI_CONTRA-NS                        | WEIGHT-BLI_max_flux-BLI_max_radiance | 0.6787 | 0.0352 |
| WEIGHT-NS-BLI_max_flux-BLI_max_radiance              | Day_nr-MRI_IPSI-MRI_CONTRA           | 0.6776 | 0.0435 |
| Day_nr-MRI_IPSI-MRI_CONTRA-BLI_max_flux-             | WEIGHT-NS                            | 0.6766 | 0.0604 |



|                                                      |                                             |        |        |
|------------------------------------------------------|---------------------------------------------|--------|--------|
| BLI_max_radiance                                     |                                             |        |        |
| Day_nr-MRI_IPSI-WEIGHT-NS                            | MRI_CONTRA-BLI_max_flux-BLI_max_radiance    | 0.6719 | 0.0415 |
| Day_nr-MRI_IPSI-WEIGHT-NS-BLI_max_radiance           | MRI_CONTRA-BLI_max_flux                     | 0.6714 | 0.0354 |
| Day_nr-WEIGHT-NS-BLI_max_flux-BLI_max_radiance       | MRI_IPSI-MRI_CONTRA                         | 0.6707 | 0.0288 |
| Day_nr-MRI_IPSI-MRI_CONTRA                           | WEIGHT-NS-BLI_max_flux-BLI_max_radiance     | 0.6704 | 0.0303 |
| Day_nr-MRI_IPSI-WEIGHT                               | MRI_CONTRA-NS-BLI_max_flux-BLI_max_radiance | 0.6679 | 0.0262 |
| Day_nr-MRI_IPSI-MRI_CONTRA-BLI_max_flux              | WEIGHT-NS-BLI_max_radiance                  | 0.6641 | 0.0350 |
| Day_nr-MRI_IPSI-MRI_CONTRA-BLI_max_radiance          | WEIGHT-NS-BLI_max_flux                      | 0.6639 | 0.0269 |
| Day_nr-MRI_IPSI-WEIGHT-BLI_max_radiance              | MRI_CONTRA-NS-BLI_max_flux                  | 0.6635 | 0.0277 |
| Day_nr-MRI_IPSI-WEIGHT-BLI_max_flux-BLI_max_radiance | MRI_CONTRA-NS                               | 0.6612 | 0.0576 |
| MRI_CONTRA-WEIGHT-BLI_max_flux-BLI_max_radiance      | Day_nr-MRI_IPSI-NS                          | 0.6606 | 0.0340 |
| Day_nr-MRI_IPSI-MRI_CONTRA-WEIGHT-BLI_max_radiance   | NS-BLI_max_flux                             | 0.6592 | 0.0248 |
| Day_nr-MRI_IPSI-WEIGHT-BLI_max_flux                  | MRI_CONTRA-NS-BLI_max_radiance              | 0.6587 | 0.0370 |
| Day_nr-MRI_IPSI-                                     | NS-BLI_max_flux-                            | 0.6567 | 0.0236 |

|                                                                 |                               |        |        |
|-----------------------------------------------------------------|-------------------------------|--------|--------|
| MRI_CONTRA-WEIGHT                                               | BLI_max_radiance              |        |        |
| Day_nr-MRI_CONTRA-WEIGHT-BLI_max_flux-BLI_max_radiance          | MRI_IPSI-NS                   | 0.6438 | 0.0300 |
| Day_nr-MRI_IPSI-MRI_CONTRA-WEIGHT-NS                            | BLI_max_flux-BLI_max_radiance | 0.6403 | 0.0270 |
| Day_nr-MRI_CONTRA-WEIGHT-NS-BLI_max_flux                        | MRI_IPSI-BLI_max_radiance     | 0.6395 | 0.0353 |
| MRI_IPSI-MRI_CONTRA-WEIGHT-BLI_max_flux-BLI_max_radiance        | Day_nr-NS                     | 0.6372 | 0.0236 |
| Day_nr-MRI_IPSI-MRI_CONTRA-WEIGHT-BLI_max_flux                  | NS-BLI_max_radiance           | 0.6177 | 0.0225 |
| Day_nr-MRI_IPSI-MRI_CONTRA-WEIGHT-NS-BLI_max_radiance           | BLI_max_flux                  | 0.6082 | 0.0247 |
| Day_nr-MRI_IPSI-MRI_CONTRA-WEIGHT-BLI_max_flux-BLI_max_radiance | NS                            | 0.5897 | 0.0199 |
| MRI_CONTRA-WEIGHT-NS-BLI_max_flux-BLI_max_radiance              | Day_nr-MRI_IPSI               | 0.5865 | 0.0340 |
| Day_nr-MRI_CONTRA-WEIGHT-NS-BLI_max_flux-BLI_max_radiance       | MRI_IPSI                      | 0.5776 | 0.0377 |
| Day_nr-MRI_IPSI-MRI_CONTRA-WEIGHT-NS-BLI_max_flux               | BLI_max_radiance              | 0.5710 | 0.0309 |
| MRI_IPSI-MRI_CONTRA-WEIGHT-NS-BLI_max_flux-BLI_max_radiance     | Day_nr                        | 0.3081 | 0.2327 |

ANN - artificial neural network; SPLX - splenectomized mice group; SD - standard deviation; MRI\_CONTRA - volume of the contralateral hemisphere measured by MRI; MRI\_IPSI - volume of the ipsilateral hemisphere measured by MRI; BLI\_max\_radiance - surface area of peak radiation measured by bioluminescence method; BLI\_max\_flux - surface area of peak growth measured by bioluminescence method; WEIGHT - animal weight; Day\_nr - day from the middle carotid artery occlusion; MCAO procedure; NS - scoring of phenotypic neurological assessment.
