# Supplementary material for: Innovative statistical approaches: the use of neural networks reduces the sample size in the splenectomy-MCAO mouse model
Source: PubMed Central journal article supplement (PMC11074938; doi:10.3325/cmj.2024.65.122), 2024-04
Supplement: CroatMedJ_65_s005.pdf [file CroatMedJ_65_s005.pdf]

**Supplemental Table 5.** Prediction accuracy of ANN class SPL-sham depending on the exclusion of variables and their combinations. The ANN was trained using a dataset containing all days after the stroke, except the 2nd day. Values in the table are sorted based on the mean accuracy prediction of class SPL-sham.

| “Out” variable                             | “In” variable                                               | The mean accuracy value of ANN predictions for the SPL-sham class. | SD of accuracy in predictions for the ANN SPL-sham class. |
|--------------------------------------------|-------------------------------------------------------------|--------------------------------------------------------------------|-----------------------------------------------------------|
| MRI_CONTRA-WEIGHT-NS                       | Day_nr-MRI_IPSI-BLI_max_flux-BLI_max_radiance               | 0.9284                                                             | 0.0366                                                    |
| MRI_IPSI-MRI_CONTRA-WEIGHT-NS              | Day_nr-BLI_max_flux-BLI_max_radiance                        | 0.9281                                                             | 0.0286                                                    |
| MRI_IPSI-MRI_CONTRA-WEIGHT                 | Day_nr-NS-BLI_max_flux-BLI_max_radiance                     | 0.9267                                                             | 0.0213                                                    |
| MRI_CONTRA-WEIGHT                          | Day_nr-MRI_IPSI-NS-BLI_max_flux-BLI_max_radiance            | 0.9180                                                             | 0.0385                                                    |
| MRI_CONTRA-WEIGHT-NS-BLI_max_flux          | Day_nr-MRI_IPSI-BLI_max_radiance                            | 0.9092                                                             | 0.0321                                                    |
| MRI_IPSI-WEIGHT                            | Day_nr-MRI_CONTRA-NS-BLI_max_flux-BLI_max_radiance          | 0.9032                                                             | 0.0347                                                    |
| MRI_IPSI-MRI_CONTRA-WEIGHT-NS-BLI_max_flux | Day_nr-BLI_max_radiance                                     | 0.8999                                                             | 0.0303                                                    |
| WEIGHT                                     | Day_nr-MRI_IPSI-MRI_CONTRA-NS-BLI_max_flux-BLI_max_radiance | 0.8955                                                             | 0.0340                                                    |
| MRI_IPSI-MRI_CONTRA-WEIGHT-BLI_max_flux    | Day_nr-NS-BLI_max_radiance                                  | 0.8902                                                             | 0.0337                                                    |
| MRI_CONTRA-WEIGHT-BLI_max_flux             | Day_nr-MRI_IPSI-NS-BLI_max_radiance                         | 0.8899                                                             | 0.0343                                                    |

|                                                            |                                                                             |        |        |
|------------------------------------------------------------|-----------------------------------------------------------------------------|--------|--------|
| MRI_IPSI-WEIGHT-NS                                         | Day_nr-MRI_CONTRA-<br>BLI_max_flux-<br>BLI_max_radiance                     | 0.8833 | 0.0442 |
| WEIGHT-NS                                                  | Day_nr-MRI_IPSI-<br>MRI_CONTRA-<br>BLI_max_flux-<br>BLI_max_radiance        | 0.8812 | 0.0492 |
| MRI_IPSI-MRI_CONTRA-<br>NS                                 | Day_nr-WEIGHT-<br>BLI_max_flux-<br>BLI_max_radiance                         | 0.8807 | 0.0336 |
| MRI_CONTRA                                                 | Day_nr-MRI_IPSI-WEIGHT-<br>NS-BLI_max_flux-<br>BLI_max_radiance             | 0.8737 | 0.0300 |
| MRI_IPSI-NS                                                | Day_nr-MRI_CONTRA-<br>WEIGHT-BLI_max_flux-<br>BLI_max_radiance              | 0.8712 | 0.0340 |
| MRI_IPSI-MRI_CONTRA                                        | Day_nr-WEIGHT-NS-<br>BLI_max_flux-<br>BLI_max_radiance                      | 0.8705 | 0.0355 |
| Day_nr-MRI_IPSI-<br>MRI_CONTRA-WEIGHT-<br>BLI_max_radiance | NS-BLI_max_flux                                                             | 0.8698 | 0.0300 |
| MRI_IPSI                                                   | Day_nr-MRI_CONTRA-<br>WEIGHT-NS-BLI_max_flux-<br>BLI_max_radiance           | 0.8678 | 0.0242 |
| Day_nr-MRI_IPSI-WEIGHT-<br>BLI_max_radiance                | MRI_CONTRA-NS-<br>BLI_max_flux                                              | 0.8669 | 0.0338 |
| NS                                                         | Day_nr-MRI_IPSI-<br>MRI_CONTRA-WEIGHT-<br>BLI_max_flux-<br>BLI_max_radiance | 0.8645 | 0.0387 |
| MRI_CONTRA-NS                                              | Day_nr-MRI_IPSI-WEIGHT-<br>BLI_max_flux-<br>BLI_max_radiance                | 0.8638 | 0.0304 |
| None                                                       | Day_nr-MRI_IPSI-<br>MRI_CONTRA-WEIGHT-                                      | 0.8576 | 0.0339 |

|                                                        |                                                           |        |        |
|--------------------------------------------------------|-----------------------------------------------------------|--------|--------|
|                                                        | NS-BLI_max_flux-<br>BLI_max_radiance                      |        |        |
| Day_nr-MRI_IPSI-<br>MRI_CONTRA-<br>BLI_max_radiance    | WEIGHT-NS-BLI_max_flux                                    | 0.8461 | 0.0317 |
| MRI_IPSI-MRI_CONTRA-<br>WEIGHT-BLI_max_radiance        | Day_nr-NS-BLI_max_flux                                    | 0.8458 | 0.0305 |
| WEIGHT-NS-BLI_max_flux                                 | Day_nr-MRI_IPSI-<br>MRI_CONTRA-<br>BLI_max_radiance       | 0.8453 | 0.0764 |
| MRI_IPSI-WEIGHT-<br>BLI_max_flux                       | Day_nr-MRI_CONTRA-NS-<br>BLI_max_radiance                 | 0.8415 | 0.0495 |
| MRI_CONTRA-WEIGHT-<br>BLI_max_radiance                 | Day_nr-MRI_IPSI-NS-<br>BLI_max_flux                       | 0.8399 | 0.0404 |
| MRI_IPSI-MRI_CONTRA-<br>WEIGHT-NS-<br>BLI_max_radiance | Day_nr-BLI_max_flux                                       | 0.8386 | 0.0349 |
| MRI_CONTRA-<br>BLI_max_flux                            | Day_nr-MRI_IPSI-WEIGHT-<br>NS-BLI_max_radiance            | 0.8361 | 0.0261 |
| Day_nr-MRI_CONTRA-<br>BLI_max_radiance                 | MRI_IPSI-WEIGHT-NS-<br>BLI_max_flux                       | 0.8356 | 0.0319 |
| MRI_IPSI-BLI_max_radiance                              | Day_nr-MRI_CONTRA-<br>WEIGHT-NS-BLI_max_flux              | 0.8325 | 0.0316 |
| Day_nr-BLI_max_radiance                                | MRI_IPSI-MRI_CONTRA-<br>WEIGHT-NS-BLI_max_flux            | 0.8323 | 0.0269 |
| WEIGHT-BLI_max_flux                                    | Day_nr-MRI_IPSI-<br>MRI_CONTRA-NS-<br>BLI_max_radiance    | 0.8300 | 0.0452 |
| MRI_IPSI-WEIGHT-<br>BLI_max_radiance                   | Day_nr-MRI_CONTRA-NS-<br>BLI_max_flux                     | 0.8299 | 0.0374 |
| BLI_max_radiance                                       | Day_nr-MRI_IPSI-<br>MRI_CONTRA-WEIGHT-<br>NS-BLI_max_flux | 0.8279 | 0.0258 |
| Day_nr-MRI_CONTRA-                                     | MRI_IPSI-NS-BLI_max_flux                                  | 0.8269 | 0.0517 |

|                                      |                                                             |        |        |
|--------------------------------------|-------------------------------------------------------------|--------|--------|
| WEIGHT-BLI_max_radiance              |                                                             |        |        |
| MRI_IPSI-MRI_CONTRA-BLI_max_radiance | Day_nr-WEIGHT-NS-BLI_max_flux                               | 0.8247 | 0.0246 |
| BLI_max_flux                         | Day_nr-MRI_IPSI-MRI_CONTRA-WEIGHT-NS-BLI_max_radiance       | 0.8240 | 0.0273 |
| WEIGHT-BLI_max_radiance              | Day_nr-MRI_IPSI-MRI_CONTRA-NS-BLI_max_flux                  | 0.8233 | 0.0389 |
| MRI_CONTRA-BLI_max_radiance          | Day_nr-MRI_IPSI-WEIGHT-NS-BLI_max_flux                      | 0.8225 | 0.0307 |
| Day_nr-MRI_CONTRA                    | MRI_IPSI-WEIGHT-NS-BLI_max_flux-BLI_max_radiance            | 0.8218 | 0.0243 |
| Day_nr-WEIGHT                        | MRI_IPSI-MRI_CONTRA-NS-BLI_max_flux-BLI_max_radiance        | 0.8217 | 0.0292 |
| Day_nr-WEIGHT-BLI_max_radiance       | MRI_IPSI-MRI_CONTRA-NS-BLI_max_flux                         | 0.8215 | 0.0351 |
| Day_nr-MRI_CONTRA-WEIGHT             | MRI_IPSI-NS-BLI_max_flux-BLI_max_radiance                   | 0.8203 | 0.0461 |
| NS-BLI_max_radiance                  | Day_nr-MRI_IPSI-MRI_CONTRA-WEIGHT-BLI_max_flux              | 0.8198 | 0.0302 |
| MRI_IPSI-BLI_max_flux                | Day_nr-MRI_CONTRA-WEIGHT-NS-BLI_max_radiance                | 0.8193 | 0.0286 |
| MRI_IPSI-MRI_CONTRA-BLI_max_flux     | Day_nr-WEIGHT-NS-BLI_max_radiance                           | 0.8190 | 0.0264 |
| Day_nr                               | MRI_IPSI-MRI_CONTRA-WEIGHT-NS-BLI_max_flux-BLI_max_radiance | 0.8188 | 0.0196 |
| Day_nr-MRI_IPSI-MRI_CONTRA-WEIGHT    | NS-BLI_max_flux-BLI_max_radiance                            | 0.8175 | 0.0276 |

|                                                                 |                                                          |        |        |
|-----------------------------------------------------------------|----------------------------------------------------------|--------|--------|
| MRI_CONTRA-WEIGHT-NS-BLI_max_radiance                           | Day_nr-MRI_IPSI-BLI_max_flux                             | 0.8173 | 0.0523 |
| Day_nr-MRI_IPSI-MRI_CONTRA-WEIGHT-BLI_max_flux-BLI_max_radiance | NS                                                       | 0.8166 | 0.0681 |
| MRI_CONTRA-NS-BLI_max_radiance                                  | Day_nr-MRI_IPSI-WEIGHT-BLI_max_flux                      | 0.8124 | 0.0253 |
| Day_nr-MRI_IPSI-WEIGHT                                          | MRI_CONTRA-NS-BLI_max_flux-BLI_max_radiance              | 0.8116 | 0.0312 |
| MRI_CONTRA-NS-BLI_max_flux                                      | Day_nr-MRI_IPSI-WEIGHT-BLI_max_radiance                  | 0.8095 | 0.0425 |
| MRI_IPSI-NS-BLI_max_radiance                                    | Day_nr-MRI_CONTRA-WEIGHT-BLI_max_flux                    | 0.8089 | 0.0351 |
| Day_nr-MRI_CONTRA-WEIGHT-BLI_max_flux                           | MRI_IPSI-NS-BLI_max_radiance                             | 0.8061 | 0.0375 |
| NS-BLI_max_flux                                                 | Day_nr-MRI_IPSI-MRI_CONTRA-WEIGHT-BLI_max_radiance       | 0.8016 | 0.0387 |
| Day_nr-NS                                                       | MRI_IPSI-MRI_CONTRA-WEIGHT-BLI_max_flux-BLI_max_radiance | 0.8004 | 0.0336 |
| MRI_IPSI-MRI_CONTRA-NS-BLI_max_radiance                         | Day_nr-WEIGHT-BLI_max_flux                               | 0.7989 | 0.0286 |
| Day_nr-MRI_CONTRA-NS-BLI_max_radiance                           | MRI_IPSI-WEIGHT-BLI_max_flux                             | 0.7984 | 0.0277 |
| Day_nr-MRI_IPSI-MRI_CONTRA-WEIGHT-NS-BLI_max_radiance           | BLI_max_flux                                             | 0.7971 | 0.0400 |
| Day_nr-MRI_CONTRA-NS                                            | MRI_IPSI-WEIGHT-BLI_max_flux-BLI_max_radiance            | 0.7949 | 0.0254 |
| MRI_IPSI-WEIGHT-NS-                                             | Day_nr-MRI_CONTRA-                                       | 0.7935 | 0.0612 |

|                                                        |                                                   |        |        |
|--------------------------------------------------------|---------------------------------------------------|--------|--------|
| BLI_max_flux                                           | BLI_max_radiance                                  |        |        |
| Day_nr-MRI_IPSI-MRI_CONTRA                             | WEIGHT-NS-BLI_max_flux-BLI_max_radiance           | 0.7924 | 0.0303 |
| Day_nr-MRI_CONTRA-BLI_max_flux                         | MRI_IPSI-WEIGHT-NS-BLI_max_radiance               | 0.7915 | 0.0321 |
| Day_nr-NS-BLI_max_radiance                             | MRI_IPSI-MRI_CONTRA-WEIGHT-BLI_max_flux           | 0.7906 | 0.0440 |
| MRI_IPSI-MRI_CONTRA-NS-BLI_max_flux                    | Day_nr-WEIGHT-BLI_max_radiance                    | 0.7886 | 0.0412 |
| Day_nr-WEIGHT-BLI_max_flux                             | MRI_IPSI-MRI_CONTRA-NS-BLI_max_radiance           | 0.7872 | 0.0345 |
| WEIGHT-NS-BLI_max_radiance                             | Day_nr-MRI_IPSI-MRI_CONTRA-BLI_max_flux           | 0.7867 | 0.0363 |
| Day_nr-WEIGHT-NS                                       | MRI_IPSI-MRI_CONTRA-BLI_max_flux-BLI_max_radiance | 0.7866 | 0.0275 |
| Day_nr-WEIGHT-NS-BLI_max_radiance                      | MRI_IPSI-MRI_CONTRA-BLI_max_flux                  | 0.7862 | 0.0314 |
| MRI_IPSI-WEIGHT-NS-BLI_max_radiance                    | Day_nr-MRI_CONTRA-BLI_max_flux                    | 0.7861 | 0.0388 |
| Day_nr-MRI_CONTRA-WEIGHT-NS                            | MRI_IPSI-BLI_max_flux-BLI_max_radiance            | 0.7858 | 0.0481 |
| Day_nr-MRI_CONTRA-WEIGHT-BLI_max_flux-BLI_max_radiance | MRI_IPSI-NS                                       | 0.7847 | 0.0400 |
| Day_nr-BLI_max_flux                                    | MRI_IPSI-MRI_CONTRA-WEIGHT-NS-BLI_max_radiance    | 0.7816 | 0.0438 |
| Day_nr-MRI_CONTRA-WEIGHT-NS-BLI_max_radiance           | MRI_IPSI-BLI_max_flux                             | 0.7811 | 0.0471 |
| Day_nr-MRI_IPSI-MRI_CONTRA-NS                          | WEIGHT-BLI_max_flux-BLI_max_radiance              | 0.7787 | 0.0251 |

|                                                 |                                                    |        |        |
|-------------------------------------------------|----------------------------------------------------|--------|--------|
| MRI_CONTRA-BLI_max_flux-BLI_max_radiance        | Day_nr-MRI_IPSI-WEIGHT-NS                          | 0.7759 | 0.0323 |
| Day_nr-WEIGHT-BLI_max_flux-BLI_max_radiance     | MRI_IPSI-MRI_CONTRA-NS                             | 0.7752 | 0.0542 |
| Day_nr-MRI_IPSI-MRI_CONTRA-WEIGHT-NS            | BLI_max_flux-BLI_max_radiance                      | 0.7750 | 0.0304 |
| Day_nr-MRI_IPSI-MRI_CONTRA-WEIGHT-BLI_max_flux  | NS-BLI_max_radiance                                | 0.7750 | 0.0384 |
| Day_nr-MRI_IPSI-WEIGHT-NS-BLI_max_radiance      | MRI_CONTRA-BLI_max_flux                            | 0.7738 | 0.0356 |
| Day_nr-MRI_IPSI-WEIGHT-NS                       | MRI_CONTRA-BLI_max_flux-BLI_max_radiance           | 0.7730 | 0.0398 |
| MRI_IPSI-NS-BLI_max_flux                        | Day_nr-MRI_CONTRA-WEIGHT-BLI_max_radiance          | 0.7725 | 0.0461 |
| MRI_CONTRA-WEIGHT-BLI_max_flux-BLI_max_radiance | Day_nr-MRI_IPSI-NS                                 | 0.7719 | 0.0450 |
| Day_nr-MRI_IPSI-WEIGHT-BLI_max_flux             | MRI_CONTRA-NS-BLI_max_radiance                     | 0.7683 | 0.0371 |
| Day_nr-MRI_CONTRA-BLI_max_flux-BLI_max_radiance | MRI_IPSI-WEIGHT-NS                                 | 0.7670 | 0.0405 |
| BLI_max_flux-BLI_max_radiance                   | Day_nr-MRI_IPSI-MRI_CONTRA-WEIGHT-NS               | 0.7666 | 0.0327 |
| Day_nr-MRI_IPSI-MRI_CONTRA-NS-BLI_max_radiance  | WEIGHT-BLI_max_flux                                | 0.7663 | 0.0694 |
| Day_nr-MRI_IPSI                                 | MRI_CONTRA-WEIGHT-NS-BLI_max_flux-BLI_max_radiance | 0.7638 | 0.0406 |

|                                                                  |                                                         |        |        |
|------------------------------------------------------------------|---------------------------------------------------------|--------|--------|
| WEIGHT-BLI_max_flux-<br>BLI_max_radiance                         | Day_nr-MRI_IPSI-<br>MRI_CONTRA-NS                       | 0.7631 | 0.0311 |
| Day_nr-MRI_IPSI-<br>MRI_CONTRA-<br>BLI_max_flux                  | WEIGHT-NS-<br>BLI_max_radiance                          | 0.7597 | 0.0356 |
| Day_nr-MRI_CONTRA-NS-<br>BLI_max_flux                            | MRI_IPSI-WEIGHT-<br>BLI_max_radiance                    | 0.7581 | 0.0282 |
| Day_nr-BLI_max_flux-<br>BLI_max_radiance                         | MRI_IPSI-MRI_CONTRA-<br>WEIGHT-NS                       | 0.7572 | 0.0333 |
| Day_nr-MRI_IPSI-NS                                               | MRI_CONTRA-WEIGHT-<br>BLI_max_flux-<br>BLI_max_radiance | 0.7517 | 0.0389 |
| MRI_IPSI-MRI_CONTRA-<br>WEIGHT-BLI_max_flux-<br>BLI_max_radiance | Day_nr-NS                                               | 0.7513 | 0.0402 |
| MRI_IPSI-MRI_CONTRA-<br>BLI_max_flux-<br>BLI_max_radiance        | Day_nr-WEIGHT-NS                                        | 0.7486 | 0.0353 |
| Day_nr-MRI_IPSI-<br>BLI_max_radiance                             | MRI_CONTRA-WEIGHT-<br>NS-BLI_max_flux                   | 0.7450 | 0.0449 |
| Day_nr-NS-BLI_max_flux                                           | MRI_IPSI-MRI_CONTRA-<br>WEIGHT-BLI_max_radiance         | 0.7443 | 0.0388 |
| Day_nr-MRI_CONTRA-<br>WEIGHT-NS-BLI_max_flux                     | MRI_IPSI-BLI_max_radiance                               | 0.7394 | 0.0518 |
| MRI_IPSI-BLI_max_flux-<br>BLI_max_radiance                       | Day_nr-MRI_CONTRA-<br>WEIGHT-NS                         | 0.7382 | 0.0232 |
| MRI_IPSI-WEIGHT-<br>BLI_max_flux-<br>BLI_max_radiance            | Day_nr-MRI_CONTRA-NS                                    | 0.7381 | 0.0321 |
| Day_nr-WEIGHT-NS-<br>BLI_max_flux                                | MRI_IPSI-MRI_CONTRA-<br>BLI_max_radiance                | 0.7358 | 0.0386 |
| Day_nr-MRI_IPSI-<br>MRI_CONTRA-WEIGHT-<br>NS-BLI_max_flux        | BLI_max_radiance                                        | 0.7282 | 0.0353 |



|                                                    |                                       |        |        |
|----------------------------------------------------|---------------------------------------|--------|--------|
| Day_nr-MRI_IPSI-BLI_max_flux                       | MRI_CONTRA-WEIGHT-NS-BLI_max_radiance | 0.7267 | 0.0268 |
| Day_nr-MRI_IPSI-NS-BLI_max_radiance                | MRI_CONTRA-WEIGHT-BLI_max_flux        | 0.7260 | 0.0335 |
| Day_nr-MRI_IPSI-WEIGHT-NS-BLI_max_flux             | MRI_CONTRA-BLI_max_radiance           | 0.7180 | 0.0830 |
| MRI_CONTRA-NS-BLI_max_flux-BLI_max_radiance        | Day_nr-MRI_IPSI-WEIGHT                | 0.7161 | 0.0317 |
| NS-BLI_max_flux-BLI_max_radiance                   | Day_nr-MRI_IPSI-MRI_CONTRA-WEIGHT     | 0.7155 | 0.0277 |
| Day_nr-MRI_CONTRA-NS-BLI_max_flux-BLI_max_radiance | MRI_IPSI-WEIGHT                       | 0.7127 | 0.0237 |
| Day_nr-MRI_IPSI-NS-BLI_max_flux                    | MRI_CONTRA-WEIGHT-BLI_max_radiance    | 0.7046 | 0.0260 |
| Day_nr-NS-BLI_max_flux-BLI_max_radiance            | MRI_IPSI-MRI_CONTRA-WEIGHT            | 0.6927 | 0.0272 |
| Day_nr-MRI_IPSI-BLI_max_flux-BLI_max_radiance      | MRI_CONTRA-WEIGHT-NS                  | 0.6907 | 0.0202 |
| Day_nr-MRI_IPSI-MRI_CONTRA-NS-BLI_max_flux         | WEIGHT-BLI_max_radiance               | 0.6893 | 0.0387 |
| MRI_IPSI-NS-BLI_max_flux-BLI_max_radiance          | Day_nr-MRI_CONTRA-WEIGHT              | 0.6804 | 0.0258 |
| Day_nr-MRI_IPSI-NS-BLI_max_flux-BLI_max_radiance   | MRI_CONTRA-WEIGHT                     | 0.6710 | 0.0193 |
| MRI_CONTRA-WEIGHT-NS-BLI_max_flux-BLI_max_radiance | Day_nr-MRI_IPSI                       | 0.6699 | 0.0396 |
| MRI_IPSI-MRI_CONTRA-                               | Day_nr-WEIGHT                         | 0.6631 | 0.0291 |

|                                                                         |                                |        |        |
|-------------------------------------------------------------------------|--------------------------------|--------|--------|
| NS-BLI_max_flux-<br>BLI_max_radiance                                    |                                |        |        |
| Day_nr-MRI_IPSI-<br>MRI_CONTRA-<br>BLI_max_flux-<br>BLI_max_radiance    | WEIGHT-NS                      | 0.6627 | 0.0386 |
| Day_nr-MRI_IPSI-WEIGHT-<br>BLI_max_flux-<br>BLI_max_radiance            | MRI_CONTRA-NS                  | 0.6601 | 0.0407 |
| Day_nr-MRI_CONTRA-<br>WEIGHT-NS-BLI_max_flux-<br>BLI_max_radiance       | MRI_IPSI                       | 0.6529 | 0.0627 |
| WEIGHT-NS-BLI_max_flux-<br>BLI_max_radiance                             | Day_nr-MRI_IPSI-<br>MRI_CONTRA | 0.6447 | 0.0431 |
| Day_nr-MRI_IPSI-<br>MRI_CONTRA-NS-<br>BLI_max_flux-<br>BLI_max_radiance | WEIGHT                         | 0.6336 | 0.0233 |
| Day_nr-WEIGHT-NS-<br>BLI_max_flux-<br>BLI_max_radiance                  | MRI_IPSI-MRI_CONTRA            | 0.6334 | 0.0415 |
| Day_nr-MRI_IPSI-WEIGHT-<br>NS-BLI_max_flux-<br>BLI_max_radiance         | MRI_CONTRA                     | 0.5912 | 0.0228 |
| MRI_IPSI-WEIGHT-NS-<br>BLI_max_flux-<br>BLI_max_radiance                | Day_nr-MRI_CONTRA              | 0.5905 | 0.0226 |
| MRI_IPSI-MRI_CONTRA-<br>WEIGHT-NS-BLI_max_flux-<br>BLI_max_radiance     | Day_nr                         | 0.4299 | 0.1477 |

ANN - artificial neural network; SD - standard deviation; MRI\_CONTRA - volume of the contralateral hemisphere measured by MRI; MRI\_IPSI - volume of the ipsilateral hemisphere measured by MRI; BLI\_max\_radiance - surface area of peak radiation measured by bioluminescence method; BLI\_max\_flux - surface area of peak growth measured by bioluminescence method; WEIGHT - animal weight; Day\_nr - day from the middle carotid artery occlusion (MCAO) procedure; NS - scoring of phenotypic neurological assessment.
