# Supplementary material for: Innovative statistical approaches: the use of neural networks reduces the sample size in the splenectomy-MCAO mouse model
Source: PubMed Central journal article supplement (PMC11074938; doi:10.3325/cmj.2024.65.122), 2024-04
Supplement: CroatMedJ_65_s006.pdf [file CroatMedJ_65_s006.pdf]

**Supplemental Table 6.** Differences in prediction accuracies of ANN classes SPLX and SPL-sham depending on the exclusion of variables and their combinations, along with t-test results. The ANN was trained using a dataset containing all days after a stroke, except the 2nd day. Values in the table are sorted based on the differences in mean accuracy predictions of classes SPLX and SPL-sham.

| “Out” variable                                                  | “In” variable                    | Mean accuracy of SPLX – Mean accuracy of SPL-sham | t-test P-value | Statistically significant difference in the prediction of SPLX and SPL-sham |
|-----------------------------------------------------------------|----------------------------------|---------------------------------------------------|----------------|-----------------------------------------------------------------------------|
| Day_nr-MRI_IPSI-MRI_CONTRA-WEIGHT-BLI_max_flux-BLI_max_radiance | NS                               | 0.2269                                            | 0.0000         | YES                                                                         |
| Day_nr-MRI_IPSI-MRI_CONTRA-WEIGHT-BLI_max_radiance              | NS-BLI_max_flux                  | 0.2106                                            | 0.0000         | YES                                                                         |
| Day_nr-MRI_IPSI-WEIGHT-BLI_max_radiance                         | MRI_CONTRA-NS-BLI_max_flux       | 0.2034                                            | 0.0000         | YES                                                                         |
| Day_nr-MRI_IPSI-MRI_CONTRA-WEIGHT-NS-BLI_max_radiance           | BLI_max_flux                     | 0.1889                                            | 0.0000         | YES                                                                         |
| Day_nr-MRI_IPSI-MRI_CONTRA-BLI_max_radiance                     | WEIGHT-NS-BLI_max_flux           | 0.1822                                            | 0.0000         | YES                                                                         |
| MRI_IPSI-MRI_CONTRA-WEIGHT-NS-BLI_max_flux                      | Day_nr-BLI_max_radiance          | 0.1669                                            | 0.0000         | YES                                                                         |
| Day_nr-MRI_IPSI-MRI_CONTRA-WEIGHT                               | NS-BLI_max_flux-BLI_max_radiance | 0.1608                                            | 0.0000         | YES                                                                         |
| Day_nr-MRI_IPSI-MRI_CONTRA-WEIGHT-BLI_max_flux                  | NS-BLI_max_radiance              | 0.1573                                            | 0.0000         | YES                                                                         |
| Day_nr-MRI_IPSI-MRI_CONTRA-WEIGHT-                              | BLI_max_radiance                 | 0.1572                                            | 0.0000         | YES                                                                         |

|                                                             |                                               |        |        |     |
|-------------------------------------------------------------|-----------------------------------------------|--------|--------|-----|
| NS-BLI_max_flux                                             |                                               |        |        |     |
| Day_nr-MRI_IPSI-WEIGHT                                      | MRI_CONTRA-NS-BLI_max_flux-BLI_max_radiance   | 0.1437 | 0.0000 | YES |
| MRI_IPSI-MRI_CONTRA-WEIGHT-NS                               | Day_nr-BLI_max_flux-BLI_max_radiance          | 0.1433 | 0.0000 | YES |
| MRI_CONTRA-WEIGHT-NS-BLI_max_flux                           | Day_nr-MRI_IPSI-BLI_max_radiance              | 0.1416 | 0.0000 | YES |
| Day_nr-MRI_CONTRA-WEIGHT-BLI_max_flux-BLI_max_radiance      | MRI_IPSI-NS                                   | 0.1409 | 0.0000 | YES |
| MRI_CONTRA-WEIGHT-NS                                        | Day_nr-MRI_IPSI-BLI_max_flux-BLI_max_radiance | 0.1394 | 0.0000 | YES |
| Day_nr-MRI_IPSI-MRI_CONTRA-WEIGHT-NS                        | BLI_max_flux-BLI_max_radiance                 | 0.1347 | 0.0000 | YES |
| MRI_IPSI-MRI_CONTRA-WEIGHT-NS-BLI_max_radiance              | Day_nr-BLI_max_flux                           | 0.1339 | 0.0000 | YES |
| MRI_IPSI-MRI_CONTRA-WEIGHT-BLI_max_flux                     | Day_nr-NS-BLI_max_radiance                    | 0.1320 | 0.0000 | YES |
| Day_nr-MRI_IPSI-MRI_CONTRA                                  | WEIGHT-NS-BLI_max_flux-BLI_max_radiance       | 0.1220 | 0.0000 | YES |
| MRI_IPSI-MRI_CONTRA-WEIGHT-NS-BLI_max_flux-BLI_max_radiance | Day_nr                                        | 0.1218 | 0.0567 | NO  |
| MRI_CONTRA-WEIGHT-BLI_max_flux                              | Day_nr-MRI_IPSI-NS-BLI_max_radiance           | 0.1210 | 0.0000 | YES |
| MRI_IPSI-MRI_CONTRA-WEIGHT                                  | Day_nr-NS-BLI_max_flux-BLI_max_radiance       | 0.1143 | 0.0000 | YES |
| MRI_IPSI-MRI_CONTRA-                                        | Day_nr-NS                                     | 0.1141 | 0.0000 | YES |

|                                                         |                                                          |        |        |     |
|---------------------------------------------------------|----------------------------------------------------------|--------|--------|-----|
| WEIGHT-BLI_max_flux-<br>BLI_max_radiance                |                                                          |        |        |     |
| MRI_CONTRA-WEIGHT-<br>NS-BLI_max_radiance               | Day_nr-MRI_IPSI-<br>BLI_max_flux                         | 0.1131 | 0.0000 | YES |
| MRI_CONTRA-WEIGHT-<br>BLI_max_flux-<br>BLI_max_radiance | Day_nr-MRI_IPSI-NS                                       | 0.1113 | 0.0000 | YES |
| Day_nr-MRI_IPSI-<br>WEIGHT-BLI_max_flux                 | MRI_CONTRA-NS-<br>BLI_max_radiance                       | 0.1096 | 0.0000 | YES |
| Day_nr-MRI_CONTRA-<br>WEIGHT-BLI_max_flux               | MRI_IPSI-NS-<br>BLI_max_radiance                         | 0.1086 | 0.0000 | YES |
| Day_nr-MRI_CONTRA-<br>WEIGHT-BLI_max_radiance           | MRI_IPSI-NS-<br>BLI_max_flux                             | 0.1051 | 0.0000 | YES |
| Day_nr-MRI_IPSI-<br>WEIGHT-NS-<br>BLI_max_radiance      | MRI_CONTRA-<br>BLI_max_flux                              | 0.1024 | 0.0000 | YES |
| MRI_CONTRA-WEIGHT                                       | Day_nr-MRI_IPSI-NS-<br>BLI_max_flux-<br>BLI_max_radiance | 0.1020 | 0.0000 | YES |
| Day_nr-MRI_IPSI-<br>WEIGHT-NS                           | MRI_CONTRA-<br>BLI_max_flux-<br>BLI_max_radiance         | 0.1011 | 0.0000 | YES |
| Day_nr-MRI_IPSI-<br>MRI_CONTRA-NS                       | WEIGHT-BLI_max_flux-<br>BLI_max_radiance                 | 0.1000 | 0.0000 | YES |
| Day_nr-MRI_CONTRA-<br>WEIGHT-NS-BLI_max_flux            | MRI_IPSI-<br>BLI_max_radiance                            | 0.0999 | 0.0000 | YES |
| Day_nr-MRI_CONTRA-<br>WEIGHT-NS-<br>BLI_max_radiance    | MRI_IPSI-BLI_max_flux                                    | 0.0999 | 0.0000 | YES |
| MRI_IPSI-MRI_CONTRA-<br>WEIGHT-BLI_max_radiance         | Day_nr-NS-BLI_max_flux                                   | 0.0991 | 0.0000 | YES |
| Day_nr-MRI_IPSI-<br>MRI_CONTRA-<br>BLI_max_flux         | WEIGHT-NS-<br>BLI_max_radiance                           | 0.0956 | 0.0000 | YES |

|                                                           |                                                          |        |        |     |
|-----------------------------------------------------------|----------------------------------------------------------|--------|--------|-----|
| MRI_CONTRA-WEIGHT-BLI_max_radiance                        | Day_nr-MRI_IPSI-NS-BLI_max_flux                          | 0.0951 | 0.0000 | YES |
| MRI_IPSI-WEIGHT-NS                                        | Day_nr-MRI_CONTRA-BLI_max_flux-BLI_max_radiance          | 0.0897 | 0.0000 | YES |
| WEIGHT-NS-BLI_max_flux                                    | Day_nr-MRI_IPSI-MRI_CONTRA-BLI_max_radiance              | 0.0897 | 0.0002 | YES |
| Day_nr-MRI_CONTRA-WEIGHT                                  | MRI_IPSI-NS-BLI_max_flux-BLI_max_radiance                | 0.0865 | 0.0000 | YES |
| MRI_CONTRA-WEIGHT-NS-BLI_max_flux-BLI_max_radiance        | Day_nr-MRI_IPSI                                          | 0.0834 | 0.0000 | YES |
| WEIGHT-NS                                                 | Day_nr-MRI_IPSI-MRI_CONTRA-BLI_max_flux-BLI_max_radiance | 0.0827 | 0.0000 | YES |
| Day_nr-MRI_IPSI-MRI_CONTRA-NS-BLI_max_radiance            | WEIGHT-BLI_max_flux                                      | 0.0774 | 0.0002 | YES |
| Day_nr-MRI_CONTRA-BLI_max_radiance                        | MRI_IPSI-WEIGHT-NS-BLI_max_flux                          | 0.0772 | 0.0000 | YES |
| Day_nr-WEIGHT-BLI_max_flux-BLI_max_radiance               | MRI_IPSI-MRI_CONTRA-NS                                   | 0.0761 | 0.0000 | YES |
| Day_nr-MRI_CONTRA-WEIGHT-NS-BLI_max_flux-BLI_max_radiance | MRI_IPSI                                                 | 0.0753 | 0.0001 | YES |
| Day_nr-WEIGHT-BLI_max_radiance                            | MRI_IPSI-MRI_CONTRA-NS-BLI_max_flux                      | 0.0742 | 0.0000 | YES |
| Day_nr-MRI_CONTRA-WEIGHT-NS                               | MRI_IPSI-BLI_max_flux-BLI_max_radiance                   | 0.0739 | 0.0000 | YES |
| MRI_IPSI-WEIGHT                                           | Day_nr-MRI_CONTRA-NS-                                    | 0.0732 | 0.0000 | YES |

|                                                         |                                                                         |        |        |     |
|---------------------------------------------------------|-------------------------------------------------------------------------|--------|--------|-----|
|                                                         | BLI_max_flux-<br>BLI_max_radiance                                       |        |        |     |
| MRI_IPSI-WEIGHT-<br>BLI_max_flux                        | Day_nr-MRI_CONTRA-NS-<br>BLI_max_radiance                               | 0.0713 | 0.0000 | YES |
| Day_nr-WEIGHT-NS-<br>BLI_max_radiance                   | MRI_IPSI-MRI_CONTRA-<br>BLI_max_flux                                    | 0.0663 | 0.0000 | YES |
| Day_nr-WEIGHT-<br>BLI_max_flux                          | MRI_IPSI-MRI_CONTRA-<br>NS-BLI_max_radiance                             | 0.0645 | 0.0000 | YES |
| Day_nr-MRI_CONTRA-<br>BLI_max_flux-<br>BLI_max_radiance | MRI_IPSI-WEIGHT-NS                                                      | 0.0640 | 0.0000 | YES |
| WEIGHT                                                  | Day_nr-MRI_IPSI-<br>MRI_CONTRA-NS-<br>BLI_max_flux-<br>BLI_max_radiance | 0.0636 | 0.0000 | YES |
| MRI_IPSI-MRI_CONTRA-<br>NS                              | Day_nr-WEIGHT-<br>BLI_max_flux-<br>BLI_max_radiance                     | 0.0604 | 0.0000 | YES |
| WEIGHT-BLI_max_flux                                     | Day_nr-MRI_IPSI-<br>MRI_CONTRA-NS-<br>BLI_max_radiance                  | 0.0603 | 0.0000 | YES |
| Day_nr-MRI_CONTRA-NS-<br>BLI_max_radiance               | MRI_IPSI-WEIGHT-<br>BLI_max_flux                                        | 0.0596 | 0.0000 | YES |
| Day_nr-MRI_CONTRA                                       | MRI_IPSI-WEIGHT-NS-<br>BLI_max_flux-<br>BLI_max_radiance                | 0.0580 | 0.0000 | YES |
| Day_nr-WEIGHT                                           | MRI_IPSI-MRI_CONTRA-<br>NS-BLI_max_flux-<br>BLI_max_radiance            | 0.0567 | 0.0000 | YES |
| Day_nr-WEIGHT-NS                                        | MRI_IPSI-MRI_CONTRA-<br>BLI_max_flux-<br>BLI_max_radiance               | 0.0550 | 0.0000 | YES |
| MRI_IPSI-MRI_CONTRA-<br>NS-BLI_max_flux                 | Day_nr-WEIGHT-<br>BLI_max_radiance                                      | 0.0545 | 0.0001 | YES |

|                                                   |                                                        |        |        |     |
|---------------------------------------------------|--------------------------------------------------------|--------|--------|-----|
| Day_nr-MRI_CONTRA-BLI_max_flux                    | MRI_IPSI-WEIGHT-NS-BLI_max_radiance                    | 0.0514 | 0.0000 | YES |
| MRI_IPSI-WEIGHT-BLI_max_flux-BLI_max_radiance     | Day_nr-MRI_CONTRA-NS                                   | 0.0508 | 0.0000 | YES |
| Day_nr-BLI_max_radiance                           | MRI_IPSI-MRI_CONTRA-WEIGHT-NS-BLI_max_flux             | 0.0475 | 0.0000 | YES |
| WEIGHT-BLI_max_flux-BLI_max_radiance              | Day_nr-MRI_IPSI-MRI_CONTRA-NS                          | 0.0464 | 0.0000 | YES |
| MRI_IPSI-WEIGHT-NS-BLI_max_radiance               | Day_nr-MRI_CONTRA-BLI_max_flux                         | 0.0461 | 0.0010 | YES |
| MRI_IPSI-WEIGHT-NS-BLI_max_flux                   | Day_nr-MRI_CONTRA-BLI_max_radiance                     | 0.0455 | 0.0075 | YES |
| MRI_CONTRA-BLI_max_flux-BLI_max_radiance          | Day_nr-MRI_IPSI-WEIGHT-NS                              | 0.0449 | 0.0001 | YES |
| Day_nr-WEIGHT-NS-BLI_max_flux                     | MRI_IPSI-MRI_CONTRA-BLI_max_radiance                   | 0.0445 | 0.0003 | YES |
| MRI_IPSI-WEIGHT-BLI_max_radiance                  | Day_nr-MRI_CONTRA-NS-BLI_max_flux                      | 0.0427 | 0.0001 | YES |
| MRI_IPSI-NS                                       | Day_nr-MRI_CONTRA-WEIGHT-BLI_max_flux-BLI_max_radiance | 0.0423 | 0.0001 | YES |
| Day_nr-MRI_CONTRA-NS                              | MRI_IPSI-WEIGHT-BLI_max_flux-BLI_max_radiance          | 0.0397 | 0.0000 | YES |
| MRI_CONTRA-NS-BLI_max_flux                        | Day_nr-MRI_IPSI-WEIGHT-BLI_max_radiance                | 0.0384 | 0.0048 | YES |
| Day_nr-MRI_CONTRA-NS-BLI_max_flux                 | MRI_IPSI-WEIGHT-BLI_max_radiance                       | 0.0384 | 0.0001 | YES |
| MRI_IPSI-MRI_CONTRA-BLI_max_flux-BLI_max_radiance | Day_nr-WEIGHT-NS                                       | 0.0383 | 0.0002 | YES |

|                                                            |                                                                             |        |        |     |
|------------------------------------------------------------|-----------------------------------------------------------------------------|--------|--------|-----|
| WEIGHT-NS-<br>BLI_max_radiance                             | Day_nr-MRI_IPSI-<br>MRI_CONTRA-<br>BLI_max_flux                             | 0.0374 | 0.0012 | YES |
| MRI_CONTRA-NS                                              | Day_nr-MRI_IPSI-<br>WEIGHT-BLI_max_flux-<br>BLI_max_radiance                | 0.0364 | 0.0003 | YES |
| MRI_IPSI-MRI_CONTRA                                        | Day_nr-WEIGHT-NS-<br>BLI_max_flux-<br>BLI_max_radiance                      | 0.0345 | 0.0012 | YES |
| Day_nr                                                     | MRI_IPSI-MRI_CONTRA-<br>WEIGHT-NS-<br>BLI_max_flux-<br>BLI_max_radiance     | 0.0345 | 0.0000 | YES |
| WEIGHT-BLI_max_radiance                                    | Day_nr-MRI_IPSI-<br>MRI_CONTRA-NS-<br>BLI_max_flux                          | 0.0323 | 0.0044 | YES |
| Day_nr-MRI_CONTRA-NS-<br>BLI_max_flux-<br>BLI_max_radiance | MRI_IPSI-WEIGHT                                                             | 0.0320 | 0.0012 | YES |
| NS                                                         | Day_nr-MRI_IPSI-<br>MRI_CONTRA-WEIGHT-<br>BLI_max_flux-<br>BLI_max_radiance | 0.0311 | 0.0087 | YES |
| Day_nr-NS-<br>BLI_max_radiance                             | MRI_IPSI-MRI_CONTRA-<br>WEIGHT-BLI_max_flux                                 | 0.0302 | 0.0171 | YES |
| MRI_CONTRA                                                 | Day_nr-MRI_IPSI-<br>WEIGHT-NS-<br>BLI_max_flux-<br>BLI_max_radiance         | 0.0278 | 0.0033 | YES |
| MRI_IPSI-MRI_CONTRA-<br>BLI_max_flux                       | Day_nr-WEIGHT-NS-<br>BLI_max_radiance                                       | 0.0266 | 0.0083 | YES |
| MRI_CONTRA-<br>BLI_max_flux                                | Day_nr-MRI_IPSI-<br>WEIGHT-NS-<br>BLI_max_radiance                          | 0.0265 | 0.0052 | YES |
| Day_nr-NS                                                  | MRI_IPSI-MRI_CONTRA-<br>WEIGHT-BLI_max_flux-                                | 0.0258 | 0.0101 | YES |

|                                             |                                                           |        |        |     |
|---------------------------------------------|-----------------------------------------------------------|--------|--------|-----|
|                                             | BLI_max_radiance                                          |        |        |     |
| MRI_CONTRA-NS-BLI_max_flux-BLI_max_radiance | Day_nr-MRI_IPSI-WEIGHT                                    | 0.0248 | 0.0089 | YES |
| MRI_CONTRA-BLI_max_radiance                 | Day_nr-MRI_IPSI-WEIGHT-NS-BLI_max_flux                    | 0.0235 | 0.0144 | YES |
| Day_nr-MRI_IPSI                             | MRI_CONTRA-WEIGHT-NS-BLI_max_flux-BLI_max_radiance        | 0.0230 | 0.0849 | NO  |
| MRI_IPSI                                    | Day_nr-MRI_CONTRA-WEIGHT-NS-BLI_max_flux-BLI_max_radiance | 0.0204 | 0.0075 | YES |
| MRI_CONTRA-NS-BLI_max_radiance              | Day_nr-MRI_IPSI-WEIGHT-BLI_max_flux                       | 0.0194 | 0.0425 | YES |
| MRI_IPSI-MRI_CONTRA-NS-BLI_max_radiance     | Day_nr-WEIGHT-BLI_max_flux                                | 0.0187 | 0.0431 | YES |
| MRI_IPSI-BLI_max_flux                       | Day_nr-MRI_CONTRA-WEIGHT-NS-BLI_max_radiance              | 0.0170 | 0.0788 | NO  |
| NS-BLI_max_flux                             | Day_nr-MRI_IPSI-MRI_CONTRA-WEIGHT-BLI_max_radiance        | 0.0169 | 0.1611 | NO  |
| MRI_IPSI-BLI_max_radiance                   | Day_nr-MRI_CONTRA-WEIGHT-NS-BLI_max_flux                  | 0.0166 | 0.0849 | NO  |
| MRI_IPSI-MRI_CONTRA-BLI_max_radiance        | Day_nr-WEIGHT-NS-BLI_max_flux                             | 0.0163 | 0.0478 | YES |
| NS-BLI_max_radiance                         | Day_nr-MRI_IPSI-MRI_CONTRA-WEIGHT-BLI_max_flux            | 0.0141 | 0.1242 | NO  |
| BLI_max_radiance                            | Day_nr-MRI_IPSI-MRI_CONTRA-WEIGHT-NS-BLI_max_flux         | 0.0121 | 0.1233 | NO  |
| BLI_max_flux                                | Day_nr-MRI_IPSI-                                          | 0.0115 | 0.2494 | NO  |



|                                                      |                                                                    |         |        |    |
|------------------------------------------------------|--------------------------------------------------------------------|---------|--------|----|
|                                                      | MRI_CONTRA-WEIGHT-NS-BLI_max_radiance                              |         |        |    |
| Day_nr-MRI_IPSI-NS                                   | MRI_CONTRA-WEIGHT-BLI_max_flux-BLI_max_radiance                    | 0.0111  | 0.3584 | NO |
| MRI_IPSI-NS-BLI_max_radiance                         | Day_nr-MRI_CONTRA-WEIGHT-BLI_max_flux                              | 0.0107  | 0.2991 | NO |
| Day_nr-BLI_max_flux                                  | MRI_IPSI-MRI_CONTRA-WEIGHT-NS-BLI_max_radiance                     | 0.0102  | 0.3790 | NO |
| None                                                 | Day_nr-MRI_IPSI-MRI_CONTRA-WEIGHT-NS-BLI_max_flux-BLI_max_radiance | 0.0091  | 0.3427 | NO |
| BLI_max_flux-BLI_max_radiance                        | Day_nr-MRI_IPSI-MRI_CONTRA-WEIGHT-NS                               | 0.0056  | 0.6031 | NO |
| MRI_IPSI-NS-BLI_max_flux                             | Day_nr-MRI_CONTRA-WEIGHT-BLI_max_radiance                          | 0.0025  | 0.8458 | NO |
| Day_nr-MRI_IPSI-BLI_max_radiance                     | MRI_CONTRA-WEIGHT-NS-BLI_max_flux                                  | -0.0010 | 0.9468 | NO |
| Day_nr-MRI_IPSI-WEIGHT-BLI_max_flux-BLI_max_radiance | MRI_CONTRA-NS                                                      | -0.0011 | 0.9438 | NO |
| MRI_IPSI-BLI_max_flux-BLI_max_radiance               | Day_nr-MRI_CONTRA-WEIGHT-NS                                        | -0.0059 | 0.5147 | NO |
| Day_nr-BLI_max_flux-BLI_max_radiance                 | MRI_IPSI-MRI_CONTRA-WEIGHT-NS                                      | -0.0076 | 0.5359 | NO |
| Day_nr-NS-BLI_max_flux                               | MRI_IPSI-MRI_CONTRA-WEIGHT-BLI_max_radiance                        | -0.0078 | 0.4777 | NO |
| NS-BLI_max_flux-BLI_max_radiance                     | Day_nr-MRI_IPSI-MRI_CONTRA-WEIGHT                                  | -0.0090 | 0.3105 | NO |

|                                                          |                                       |         |        |     |
|----------------------------------------------------------|---------------------------------------|---------|--------|-----|
| Day_nr-MRI_IPSI-WEIGHT-NS-BLI_max_flux                   | MRI_CONTRA-BLI_max_radiance           | -0.0096 | 0.6321 | NO  |
| Day_nr-MRI_IPSI-MRI_CONTRA-BLI_max_flux-BLI_max_radiance | WEIGHT-NS                             | -0.0139 | 0.3919 | NO  |
| MRI_IPSI-MRI_CONTRA-NS-BLI_max_flux-BLI_max_radiance     | Day_nr-WEIGHT                         | -0.0190 | 0.0445 | YES |
| Day_nr-MRI_IPSI-NS-BLI_max_radiance                      | MRI_CONTRA-WEIGHT-BLI_max_flux        | -0.0200 | 0.1583 | NO  |
| Day_nr-MRI_IPSI-MRI_CONTRA-NS-BLI_max_flux               | WEIGHT-BLI_max_radiance               | -0.0311 | 0.0173 | YES |
| WEIGHT-NS-BLI_max_flux-BLI_max_radiance                  | Day_nr-MRI_IPSI-MRI_CONTRA            | -0.0329 | 0.0215 | YES |
| Day_nr-WEIGHT-NS-BLI_max_flux-BLI_max_radiance           | MRI_IPSI-MRI_CONTRA                   | -0.0373 | 0.0022 | YES |
| Day_nr-NS-BLI_max_flux-BLI_max_radiance                  | MRI_IPSI-MRI_CONTRA-WEIGHT            | -0.0401 | 0.0007 | YES |
| MRI_IPSI-NS-BLI_max_flux-BLI_max_radiance                | Day_nr-MRI_CONTRA-WEIGHT              | -0.0446 | 0.0000 | YES |
| Day_nr-MRI_IPSI-BLI_max_flux                             | MRI_CONTRA-WEIGHT-NS-BLI_max_radiance | -0.0478 | 0.0001 | YES |
| Day_nr-MRI_IPSI-BLI_max_flux-BLI_max_radiance            | MRI_CONTRA-WEIGHT-NS                  | -0.0646 | 0.0000 | YES |
| Day_nr-MRI_IPSI-NS-BLI_max_flux                          | MRI_CONTRA-WEIGHT-BLI_max_radiance    | -0.0713 | 0.0000 | YES |
| Day_nr-MRI_IPSI-NS-BLI_max_flux-BLI_max_radiance         | MRI_CONTRA-WEIGHT                     | -0.0714 | 0.0000 | YES |

|                                                                         |                   |         |        |     |
|-------------------------------------------------------------------------|-------------------|---------|--------|-----|
| Day_nr-MRI_IPSI-<br>MRI_CONTRA-NS-<br>BLI_max_flux-<br>BLI_max_radiance | WEIGHT            | -0.0728 | 0.0000 | YES |
| MRI_IPSI-WEIGHT-NS-<br>BLI_max_flux-<br>BLI_max_radiance                | Day_nr-MRI_CONTRA | -0.1264 | 0.0000 | YES |
| Day_nr-MRI_IPSI-<br>WEIGHT-NS-<br>BLI_max_flux-<br>BLI_max_radiance     | MRI_CONTRA        | -0.1541 | 0.0000 | YES |

ANN - artificial neural network; SPLX - splenectomized mice group; SPL-sham - sham-operated mice group; SD - standard deviation; MRI\_CONTRA - volume of the contralateral hemisphere measured by MRI; MRI\_IPSI - volume of the ipsilateral hemisphere measured by MRI; BLI\_max\_radiance - surface area of peak radiation measured by bioluminescence method; BLI\_max\_flux - surface area of peak growth measured by bioluminescence method; WEIGHT - animal weight; Day\_nr - day from the middle carotid artery occlusion (MCAO) procedure; NS - scoring of phenotypic neurological assessment.
