# Supplementary material for: Innovative statistical approaches: the use of neural networks reduces the sample size in the splenectomy-MCAO mouse model
Source: PubMed Central journal article supplement (PMC11074938; doi:10.3325/cmj.2024.65.122), 2024-04
Supplement: CroatMedJ_65_s007.pdf [file CroatMedJ_65_s007.pdf]

**Supplemental Table 7.** Prediction accuracy of ANN class SPLX depending on the exclusion of variables and their combinations. The ANN was trained using a dataset with all days after a stroke, except the 2nd and 4th days. Values in the table are sorted based on the mean accuracy prediction of class SPLX.

| “Out” variable                | “In” variable                                                   | The mean accuracy value of ANN predictions for the SPLX class | SD of accuracy in predictions for the ANN SPLX class |
|-------------------------------|-----------------------------------------------------------------|---------------------------------------------------------------|------------------------------------------------------|
| MRI_IPSI-MRI_CONTRA-WEIGHT-NS | Day_nr-BLI_max_flux-BLI_max_radiance                            | 0.9156                                                        | 0.0303                                               |
| MRI_IPSI-NS                   | Day_nr-MRI_CONTRA-WEIGHT-BLI_max_flux-BLI_max_radiance          | 0.9126                                                        | 0.0267                                               |
| MRI_IPSI-WEIGHT               | Day_nr-MRI_CONTRA-NS-BLI_max_flux-BLI_max_radiance              | 0.9102                                                        | 0.0352                                               |
| MRI_IPSI-MRI_CONTRA-WEIGHT    | Day_nr-NS-BLI_max_flux-BLI_max_radiance                         | 0.9099                                                        | 0.0310                                               |
| MRI_IPSI                      | Day_nr-MRI_CONTRA-WEIGHT-NS-BLI_max_flux-BLI_max_radiance       | 0.9087                                                        | 0.0361                                               |
| NS                            | Day_nr-MRI_IPSI-MRI_CONTRA-WEIGHT-BLI_max_flux-BLI_max_radiance | 0.9067                                                        | 0.0268                                               |
| MRI_IPSI-WEIGHT-NS            | Day_nr-MRI_CONTRA-BLI_max_flux-BLI_max_radiance                 | 0.9061                                                        | 0.0240                                               |
| MRI_CONTRA-WEIGHT-NS          | Day_nr-MRI_IPSI-BLI_max_flux-BLI_max_radiance                   | 0.9047                                                        | 0.0277                                               |
| MRI_IPSI-MRI_CONTRA-NS        | Day_nr-WEIGHT-BLI_max_flux-                                     | 0.9039                                                        | 0.0261                                               |

|                                 |                                                                                |        |        |
|---------------------------------|--------------------------------------------------------------------------------|--------|--------|
|                                 | BLI_max_radiance                                                               |        |        |
| WEIGHT                          | Day_nr-MRI_IPSI-<br>MRI_CONTRA-NS-<br>BLI_max_flux-<br>BLI_max_radiance        | 0.9021 | 0.0353 |
| MRI_CONTRA-NS                   | Day_nr-MRI_IPSI-<br>WEIGHT-BLI_max_flux-<br>BLI_max_radiance                   | 0.9019 | 0.0272 |
| MRI_CONTRA-WEIGHT               | Day_nr-MRI_IPSI-NS-<br>BLI_max_flux-<br>BLI_max_radiance                       | 0.9000 | 0.0294 |
| None                            | Day_nr-MRI_IPSI-<br>MRI_CONTRA-WEIGHT-<br>NS-BLI_max_flux-<br>BLI_max_radiance | 0.8993 | 0.0379 |
| MRI_IPSI-MRI_CONTRA             | Day_nr-WEIGHT-NS-<br>BLI_max_flux-<br>BLI_max_radiance                         | 0.8993 | 0.0377 |
| Day_nr-WEIGHT-NS                | MRI_IPSI-MRI_CONTRA-<br>BLI_max_flux-<br>BLI_max_radiance                      | 0.8942 | 0.0347 |
| Day_nr-MRI_CONTRA-<br>WEIGHT-NS | MRI_IPSI-BLI_max_flux-<br>BLI_max_radiance                                     | 0.8942 | 0.0319 |
| Day_nr-MRI_CONTRA-<br>WEIGHT    | MRI_IPSI-NS-<br>BLI_max_flux-<br>BLI_max_radiance                              | 0.8940 | 0.0277 |
| WEIGHT-NS                       | Day_nr-MRI_IPSI-<br>MRI_CONTRA-<br>BLI_max_flux-<br>BLI_max_radiance           | 0.8938 | 0.0304 |
| Day_nr-MRI_CONTRA               | MRI_IPSI-WEIGHT-NS-<br>BLI_max_flux-<br>BLI_max_radiance                       | 0.8925 | 0.0334 |
| MRI_CONTRA                      | Day_nr-MRI_IPSI-<br>WEIGHT-NS-<br>BLI_max_flux-                                | 0.8920 | 0.0421 |

|                                             |                                                                         |        |        |
|---------------------------------------------|-------------------------------------------------------------------------|--------|--------|
|                                             | BLI_max_radiance                                                        |        |        |
| Day_nr-MRI_CONTRA-NS                        | MRI_IPSI-WEIGHT-<br>BLI_max_flux-<br>BLI_max_radiance                   | 0.8887 | 0.0362 |
| MRI_IPSI-BLI_max_flux                       | Day_nr-MRI_CONTRA-<br>WEIGHT-NS-<br>BLI_max_radiance                    | 0.8875 | 0.0241 |
| Day_nr-WEIGHT                               | MRI_IPSI-MRI_CONTRA-<br>NS-BLI_max_flux-<br>BLI_max_radiance            | 0.8866 | 0.0343 |
| Day_nr-MRI_IPSI-WEIGHT-<br>NS               | MRI_CONTRA-<br>BLI_max_flux-<br>BLI_max_radiance                        | 0.8854 | 0.0335 |
| Day_nr-MRI_IPSI-<br>MRI_CONTRA              | WEIGHT-NS-<br>BLI_max_flux-<br>BLI_max_radiance                         | 0.8845 | 0.0322 |
| MRI_IPSI-MRI_CONTRA-<br>BLI_max_flux        | Day_nr-WEIGHT-NS-<br>BLI_max_radiance                                   | 0.8844 | 0.0278 |
| Day_nr-MRI_IPSI-<br>MRI_CONTRA-WEIGHT-NS    | BLI_max_flux-<br>BLI_max_radiance                                       | 0.8840 | 0.0296 |
| MRI_IPSI-MRI_CONTRA-<br>WEIGHT-BLI_max_flux | Day_nr-NS-<br>BLI_max_radiance                                          | 0.8835 | 0.0250 |
| BLI_max_flux                                | Day_nr-MRI_IPSI-<br>MRI_CONTRA-WEIGHT-<br>NS-BLI_max_radiance           | 0.8830 | 0.0317 |
| Day_nr-NS                                   | MRI_IPSI-MRI_CONTRA-<br>WEIGHT-BLI_max_flux-<br>BLI_max_radiance        | 0.8828 | 0.0275 |
| Day_nr-MRI_IPSI-<br>MRI_CONTRA-WEIGHT       | NS-BLI_max_flux-<br>BLI_max_radiance                                    | 0.8824 | 0.0369 |
| Day_nr                                      | MRI_IPSI-MRI_CONTRA-<br>WEIGHT-NS-<br>BLI_max_flux-<br>BLI_max_radiance | 0.8816 | 0.0375 |

|                                       |                                                    |        |        |
|---------------------------------------|----------------------------------------------------|--------|--------|
| MRI_CONTRA-BLI_max_flux               | Day_nr-MRI_IPSI-WEIGHT-NS-BLI_max_radiance         | 0.8808 | 0.0302 |
| Day_nr-MRI_IPSI                       | MRI_CONTRA-WEIGHT-NS-BLI_max_flux-BLI_max_radiance | 0.8803 | 0.0323 |
| WEIGHT-BLI_max_flux                   | Day_nr-MRI_IPSI-MRI_CONTRA-NS-BLI_max_radiance     | 0.8802 | 0.0332 |
| MRI_IPSI-WEIGHT-BLI_max_flux          | Day_nr-MRI_CONTRA-NS-BLI_max_radiance              | 0.8796 | 0.0366 |
| Day_nr-MRI_IPSI-NS                    | MRI_CONTRA-WEIGHT-BLI_max_flux-BLI_max_radiance    | 0.8784 | 0.0287 |
| Day_nr-MRI_IPSI-MRI_CONTRA-NS         | WEIGHT-BLI_max_flux-BLI_max_radiance               | 0.8778 | 0.0330 |
| MRI_CONTRA-WEIGHT-BLI_max_flux        | Day_nr-MRI_IPSI-NS-BLI_max_radiance                | 0.8758 | 0.0314 |
| Day_nr-BLI_max_flux                   | MRI_IPSI-MRI_CONTRA-WEIGHT-NS-BLI_max_radiance     | 0.8723 | 0.0289 |
| Day_nr-MRI_CONTRA-BLI_max_flux        | MRI_IPSI-WEIGHT-NS-BLI_max_radiance                | 0.8714 | 0.0342 |
| Day_nr-WEIGHT-BLI_max_flux            | MRI_IPSI-MRI_CONTRA-NS-BLI_max_radiance            | 0.8712 | 0.0328 |
| Day_nr-MRI_IPSI-WEIGHT                | MRI_CONTRA-NS-BLI_max_flux-BLI_max_radiance        | 0.8709 | 0.0353 |
| Day_nr-MRI_CONTRA-WEIGHT-BLI_max_flux | MRI_IPSI-NS-BLI_max_radiance                       | 0.8703 | 0.0366 |
| MRI_CONTRA-NS-BLI_max_flux            | Day_nr-MRI_IPSI-WEIGHT-BLI_max_radiance            | 0.8684 | 0.0342 |
| Day_nr-MRI_IPSI-WEIGHT-               | MRI_CONTRA-NS-                                     | 0.8676 | 0.0331 |

|                                                |                                                    |        |        |
|------------------------------------------------|----------------------------------------------------|--------|--------|
| BLI_max_flux                                   | BLI_max_radiance                                   |        |        |
| Day_nr-MRI_CONTRA-NS-BLI_max_flux              | MRI_IPSI-WEIGHT-BLI_max_radiance                   | 0.8667 | 0.0367 |
| MRI_IPSI-MRI_CONTRA-NS-BLI_max_flux            | Day_nr-WEIGHT-BLI_max_radiance                     | 0.8658 | 0.0314 |
| NS-BLI_max_flux                                | Day_nr-MRI_IPSI-MRI_CONTRA-WEIGHT-BLI_max_radiance | 0.8639 | 0.0345 |
| MRI_CONTRA-WEIGHT-NS-BLI_max_flux              | Day_nr-MRI_IPSI-BLI_max_radiance                   | 0.8638 | 0.0239 |
| Day_nr-NS-BLI_max_flux                         | MRI_IPSI-MRI_CONTRA-WEIGHT-BLI_max_radiance        | 0.8635 | 0.0404 |
| Day_nr-MRI_IPSI-MRI_CONTRA-NS-BLI_max_flux     | WEIGHT-BLI_max_radiance                            | 0.8616 | 0.0307 |
| MRI_IPSI-NS-BLI_max_flux                       | Day_nr-MRI_CONTRA-WEIGHT-BLI_max_radiance          | 0.8613 | 0.0358 |
| Day_nr-MRI_IPSI-BLI_max_flux                   | MRI_CONTRA-WEIGHT-NS-BLI_max_radiance              | 0.8580 | 0.0273 |
| MRI_IPSI-MRI_CONTRA-WEIGHT-NS-BLI_max_flux     | Day_nr-BLI_max_radiance                            | 0.8578 | 0.0276 |
| Day_nr-MRI_IPSI-MRI_CONTRA-WEIGHT-BLI_max_flux | NS-BLI_max_radiance                                | 0.8564 | 0.0363 |
| Day_nr-MRI_IPSI-MRI_CONTRA-BLI_max_flux        | WEIGHT-NS-BLI_max_radiance                         | 0.8563 | 0.0342 |
| Day_nr-MRI_IPSI-NS-BLI_max_flux                | MRI_CONTRA-WEIGHT-BLI_max_radiance                 | 0.8563 | 0.0300 |
| Day_nr-MRI_CONTRA-WEIGHT-NS-BLI_max_flux       | MRI_IPSI-BLI_max_radiance                          | 0.8561 | 0.0299 |
| MRI_IPSI-BLI_max_radiance                      | Day_nr-MRI_CONTRA-                                 | 0.8547 | 0.0342 |

|                                                   |                                                   |        |        |
|---------------------------------------------------|---------------------------------------------------|--------|--------|
|                                                   | WEIGHT-NS-BLI_max_flux                            |        |        |
| MRI_IPSI-WEIGHT-NS-BLI_max_flux                   | Day_nr-MRI_CONTRA-BLI_max_radiance                | 0.8519 | 0.0400 |
| Day_nr-WEIGHT-NS-BLI_max_flux                     | MRI_IPSI-MRI_CONTRA-BLI_max_radiance              | 0.8505 | 0.0321 |
| WEIGHT-NS-BLI_max_flux                            | Day_nr-MRI_IPSI-MRI_CONTRA-BLI_max_radiance       | 0.8483 | 0.0341 |
| BLI_max_radiance                                  | Day_nr-MRI_IPSI-MRI_CONTRA-WEIGHT-NS-BLI_max_flux | 0.8475 | 0.0325 |
| Day_nr-MRI_IPSI-WEIGHT-NS-BLI_max_flux            | MRI_CONTRA-BLI_max_radiance                       | 0.8435 | 0.0305 |
| MRI_IPSI-NS-BLI_max_radiance                      | Day_nr-MRI_CONTRA-WEIGHT-BLI_max_flux             | 0.8314 | 0.0350 |
| NS-BLI_max_radiance                               | Day_nr-MRI_IPSI-MRI_CONTRA-WEIGHT-BLI_max_flux    | 0.8267 | 0.0298 |
| Day_nr-MRI_IPSI-MRI_CONTRA-WEIGHT-NS-BLI_max_flux | BLI_max_radiance                                  | 0.8192 | 0.0293 |
| MRI_CONTRA-BLI_max_radiance                       | Day_nr-MRI_IPSI-WEIGHT-NS-BLI_max_flux            | 0.8160 | 0.0363 |
| WEIGHT-BLI_max_radiance                           | Day_nr-MRI_IPSI-MRI_CONTRA-NS-BLI_max_flux        | 0.8149 | 0.0331 |
| MRI_IPSI-MRI_CONTRA-BLI_max_radiance              | Day_nr-WEIGHT-NS-BLI_max_flux                     | 0.8143 | 0.0398 |
| MRI_IPSI-WEIGHT-BLI_max_radiance                  | Day_nr-MRI_CONTRA-NS-BLI_max_flux                 | 0.8038 | 0.0435 |
| MRI_IPSI-BLI_max_flux-BLI_max_radiance            | Day_nr-MRI_CONTRA-WEIGHT-NS                       | 0.7942 | 0.0375 |
| BLI_max_flux-BLI_max_radiance                     | Day_nr-MRI_IPSI-MRI_CONTRA-WEIGHT-                | 0.7934 | 0.0360 |

|                                               |                                            |        |        |
|-----------------------------------------------|--------------------------------------------|--------|--------|
|                                               | NS                                         |        |        |
| MRI_CONTRA-NS-BLI_max_radiance                | Day_nr-MRI_IPSI-WEIGHT-BLI_max_flux        | 0.7934 | 0.0280 |
| Day_nr-MRI_IPSI-BLI_max_radiance              | MRI_CONTRA-WEIGHT-NS-BLI_max_flux          | 0.7932 | 0.0466 |
| MRI_IPSI-MRI_CONTRA-NS-BLI_max_radiance       | Day_nr-WEIGHT-BLI_max_flux                 | 0.7924 | 0.0344 |
| Day_nr-BLI_max_radiance                       | MRI_IPSI-MRI_CONTRA-WEIGHT-NS-BLI_max_flux | 0.7882 | 0.0305 |
| Day_nr-MRI_IPSI-BLI_max_flux-BLI_max_radiance | MRI_CONTRA-WEIGHT-NS                       | 0.7850 | 0.0461 |
| MRI_IPSI-WEIGHT-NS-BLI_max_radiance           | Day_nr-MRI_CONTRA-BLI_max_flux             | 0.7816 | 0.0375 |
| WEIGHT-NS-BLI_max_radiance                    | Day_nr-MRI_IPSI-MRI_CONTRA-BLI_max_flux    | 0.7798 | 0.0431 |
| Day_nr-NS-BLI_max_radiance                    | MRI_IPSI-MRI_CONTRA-WEIGHT-BLI_max_flux    | 0.7786 | 0.0319 |
| Day_nr-BLI_max_flux-BLI_max_radiance          | MRI_IPSI-MRI_CONTRA-WEIGHT-NS              | 0.7765 | 0.0386 |
| Day_nr-WEIGHT-BLI_max_radiance                | MRI_IPSI-MRI_CONTRA-NS-BLI_max_flux        | 0.7610 | 0.0366 |
| Day_nr-MRI_IPSI-NS-BLI_max_radiance           | MRI_CONTRA-WEIGHT-BLI_max_flux             | 0.7593 | 0.0369 |
| Day_nr-MRI_CONTRA-BLI_max_radiance            | MRI_IPSI-WEIGHT-NS-BLI_max_flux            | 0.7556 | 0.0359 |
| MRI_CONTRA-BLI_max_flux-BLI_max_radiance      | Day_nr-MRI_IPSI-WEIGHT-NS                  | 0.7550 | 0.0418 |
| MRI_IPSI-MRI_CONTRA-WEIGHT-BLI_max_radiance   | Day_nr-NS-BLI_max_flux                     | 0.7530 | 0.0331 |
| MRI_CONTRA-WEIGHT-                            | Day_nr-MRI_IPSI-NS-                        | 0.7494 | 0.0372 |

|                                                         |                                   |        |        |
|---------------------------------------------------------|-----------------------------------|--------|--------|
| BLI_max_radiance                                        | BLI_max_flux                      |        |        |
| MRI_IPSI-MRI_CONTRA-BLI_max_flux-BLI_max_radiance       | Day_nr-WEIGHT-NS                  | 0.7492 | 0.0391 |
| Day_nr-WEIGHT-NS-BLI_max_radiance                       | MRI_IPSI-MRI_CONTRA-BLI_max_flux  | 0.7428 | 0.0358 |
| Day_nr-MRI_IPSI-NS-BLI_max_flux-BLI_max_radiance        | MRI_CONTRA-WEIGHT                 | 0.7422 | 0.0428 |
| Day_nr-MRI_CONTRA-NS-BLI_max_radiance                   | MRI_IPSI-WEIGHT-BLI_max_flux      | 0.7420 | 0.0347 |
| Day_nr-NS-BLI_max_flux-BLI_max_radiance                 | MRI_IPSI-MRI_CONTRA-WEIGHT        | 0.7389 | 0.0355 |
| MRI_IPSI-NS-BLI_max_flux-BLI_max_radiance               | Day_nr-MRI_CONTRA-WEIGHT          | 0.7361 | 0.0384 |
| MRI_IPSI-WEIGHT-BLI_max_flux-BLI_max_radiance           | Day_nr-MRI_CONTRA-NS              | 0.7347 | 0.0527 |
| NS-BLI_max_flux-BLI_max_radiance                        | Day_nr-MRI_IPSI-MRI_CONTRA-WEIGHT | 0.7332 | 0.0314 |
| Day_nr-MRI_IPSI-WEIGHT-NS-BLI_max_flux-BLI_max_radiance | MRI_CONTRA                        | 0.7325 | 0.0433 |
| WEIGHT-BLI_max_flux-BLI_max_radiance                    | Day_nr-MRI_IPSI-MRI_CONTRA-NS     | 0.7314 | 0.0474 |
| Day_nr-MRI_CONTRA-BLI_max_flux-BLI_max_radiance         | MRI_IPSI-WEIGHT-NS                | 0.7246 | 0.0399 |
| MRI_IPSI-MRI_CONTRA-WEIGHT-NS-BLI_max_radiance          | Day_nr-BLI_max_flux               | 0.7242 | 0.0346 |
| Day_nr-WEIGHT-BLI_max_flux-BLI_max_radiance             | MRI_IPSI-MRI_CONTRA-NS            | 0.7234 | 0.0398 |



|                                                             |                              |        |        |
|-------------------------------------------------------------|------------------------------|--------|--------|
| MRI_CONTRA-WEIGHT-NS-BLI_max_radiance                       | Day_nr-MRI_IPSI-BLI_max_flux | 0.7229 | 0.0355 |
| MRI_IPSI-WEIGHT-NS-BLI_max_flux-BLI_max_radiance            | Day_nr-MRI_CONTRA            | 0.7186 | 0.0485 |
| Day_nr-MRI_IPSI-MRI_CONTRA-BLI_max_flux-BLI_max_radiance    | WEIGHT-NS                    | 0.7119 | 0.0512 |
| Day_nr-MRI_IPSI-MRI_CONTRA-NS-BLI_max_flux-BLI_max_radiance | WEIGHT                       | 0.7054 | 0.0421 |
| Day_nr-MRI_CONTRA-WEIGHT-BLI_max_radiance                   | MRI_IPSI-NS-BLI_max_flux     | 0.7046 | 0.0427 |
| Day_nr-WEIGHT-NS-BLI_max_flux-BLI_max_radiance              | MRI_IPSI-MRI_CONTRA          | 0.7031 | 0.0558 |
| Day_nr-MRI_IPSI-WEIGHT-BLI_max_flux-BLI_max_radiance        | MRI_CONTRA-NS                | 0.7023 | 0.0473 |
| MRI_CONTRA-NS-BLI_max_flux-BLI_max_radiance                 | Day_nr-MRI_IPSI-WEIGHT       | 0.6970 | 0.0369 |
| WEIGHT-NS-BLI_max_flux-BLI_max_radiance                     | Day_nr-MRI_IPSI-MRI_CONTRA   | 0.6964 | 0.0523 |
| MRI_IPSI-MRI_CONTRA-NS-BLI_max_flux-BLI_max_radiance        | Day_nr-WEIGHT                | 0.6959 | 0.0329 |
| Day_nr-MRI_IPSI-MRI_CONTRA-NS-BLI_max_radiance              | WEIGHT-BLI_max_flux          | 0.6914 | 0.0448 |
| Day_nr-MRI_IPSI-MRI_CONTRA-BLI_max_radiance                 | WEIGHT-NS-BLI_max_flux       | 0.6866 | 0.0542 |

|                                                                             |                                |        |        |
|-----------------------------------------------------------------------------|--------------------------------|--------|--------|
| Day_nr-MRI_CONTRA-NS-<br>BLI_max_flux-<br>BLI_max_radiance                  | MRI_IPSI-WEIGHT                | 0.6851 | 0.0446 |
| Day_nr-MRI_IPSI-WEIGHT-<br>BLI_max_radiance                                 | MRI_CONTRA-NS-<br>BLI_max_flux | 0.6842 | 0.0508 |
| Day_nr-MRI_CONTRA-<br>WEIGHT-NS-<br>BLI_max_radiance                        | MRI_IPSI-BLI_max_flux          | 0.6802 | 0.0425 |
| Day_nr-MRI_IPSI-WEIGHT-<br>NS-BLI_max_radiance                              | MRI_CONTRA-<br>BLI_max_flux    | 0.6773 | 0.0515 |
| MRI_CONTRA-WEIGHT-<br>BLI_max_flux-<br>BLI_max_radiance                     | Day_nr-MRI_IPSI-NS             | 0.6522 | 0.0473 |
| Day_nr-MRI_IPSI-<br>MRI_CONTRA-WEIGHT-<br>BLI_max_radiance                  | NS-BLI_max_flux                | 0.6512 | 0.0376 |
| MRI_IPSI-MRI_CONTRA-<br>WEIGHT-BLI_max_flux-<br>BLI_max_radiance            | Day_nr-NS                      | 0.6462 | 0.0396 |
| Day_nr-MRI_IPSI-<br>MRI_CONTRA-WEIGHT-<br>NS-BLI_max_radiance               | BLI_max_flux                   | 0.6375 | 0.0372 |
| Day_nr-MRI_CONTRA-<br>WEIGHT-BLI_max_flux-<br>BLI_max_radiance              | MRI_IPSI-NS                    | 0.6359 | 0.0474 |
| Day_nr-MRI_IPSI-<br>MRI_CONTRA-WEIGHT-<br>BLI_max_flux-<br>BLI_max_radiance | NS                             | 0.6003 | 0.0356 |
| Day_nr-MRI_CONTRA-<br>WEIGHT-NS-BLI_max_flux-<br>BLI_max_radiance           | MRI_IPSI                       | 0.5372 | 0.0391 |
| MRI_CONTRA-WEIGHT-<br>NS-BLI_max_flux-<br>BLI_max_radiance                  | Day_nr-MRI_IPSI                | 0.5188 | 0.0334 |

|                                                                     |        |        |        |
|---------------------------------------------------------------------|--------|--------|--------|
| MRI_IPSI-MRI_CONTRA-<br>WEIGHT-NS-BLI_max_flux-<br>BLI_max_radiance | Day_nr | 0.3792 | 0.1951 |
|---------------------------------------------------------------------|--------|--------|--------|

ANN - artificial neural network; SPLX - splenectomized mice group; SD - standard deviation; MRI\_CONTRA - volume of the contralateral hemisphere measured by MRI; MRI\_IPSI - volume of the ipsilateral hemisphere measured by MRI; BLI\_max\_radiance - surface area of peak radiation measured by bioluminescence method; BLI\_max\_flux - surface area of peak growth measured by bioluminescence method; WEIGHT - animal weight; Day\_nr - day from the middle carotid artery occlusion (MCAO) procedure; NS - scoring of phenotypic neurological assessment.
