# Supplementary material for: Innovative statistical approaches: the use of neural networks reduces the sample size in the splenectomy-MCAO mouse model
Source: PubMed Central journal article supplement (PMC11074938; doi:10.3325/cmj.2024.65.122), 2024-04
Supplement: CroatMedJ_65_s008.pdf [file CroatMedJ_65_s008.pdf]

**Supplemental Table 8.** Prediction accuracy of the ANN class SPL-sham depending on the exclusion of variables and their combinations. The ANN was trained using a dataset with all days after a stroke, except the 2nd and 4th days. Values in the table are sorted based on the mean accuracy prediction of class SPL-sham.

| “Out” variable             | “In” variable                                          | The mean accuracy value of ANN predictions for the SPL-sham class | SD of accuracy in predictions for the ANN SPL-sham class |
|----------------------------|--------------------------------------------------------|-------------------------------------------------------------------|----------------------------------------------------------|
| MRI_IPSI-WEIGHT            | Day_nr-MRI_CONTRA-NS-BLI_max_flux-BLI_max_radiance     | 0.9867                                                            | 0.0154                                                   |
| MRI_IPSI-MRI_CONTRA-WEIGHT | Day_nr-NS-BLI_max_flux-BLI_max_radiance                | 0.9840                                                            | 0.0132                                                   |
| MRI_CONTRA-WEIGHT          | Day_nr-MRI_IPSI-NS-BLI_max_flux-BLI_max_radiance       | 0.9838                                                            | 0.0140                                                   |
| Day_nr-MRI_CONTRA-WEIGHT   | MRI_IPSI-NS-BLI_max_flux-BLI_max_radiance              | 0.9809                                                            | 0.0193                                                   |
| Day_nr-MRI_CONTRA-NS       | MRI_IPSI-WEIGHT-BLI_max_flux-BLI_max_radiance          | 0.9807                                                            | 0.0148                                                   |
| MRI_CONTRA-WEIGHT-NS       | Day_nr-MRI_IPSI-BLI_max_flux-BLI_max_radiance          | 0.9802                                                            | 0.0139                                                   |
| MRI_IPSI-NS                | Day_nr-MRI_CONTRA-WEIGHT-BLI_max_flux-BLI_max_radiance | 0.9801                                                            | 0.0154                                                   |
| MRI_IPSI-WEIGHT-NS         | Day_nr-MRI_CONTRA-BLI_max_flux-BLI_max_radiance        | 0.9789                                                            | 0.0142                                                   |
| WEIGHT-NS                  | Day_nr-MRI_IPSI-MRI_CONTRA-BLI_max_flux-               | 0.9783                                                            | 0.0211                                                   |

|                                          |                                                                 |        |        |
|------------------------------------------|-----------------------------------------------------------------|--------|--------|
|                                          | BLI_max_radiance                                                |        |        |
| MRI_IPSI-MRI_CONTRA-WEIGHT-NS            | Day_nr-BLI_max_flux-BLI_max_radiance                            | 0.9782 | 0.0146 |
| MRI_CONTRA-NS                            | Day_nr-MRI_IPSI-WEIGHT-BLI_max_flux-BLI_max_radiance            | 0.9779 | 0.0136 |
| WEIGHT                                   | Day_nr-MRI_IPSI-MRI_CONTRA-NS-BLI_max_flux-BLI_max_radiance     | 0.9769 | 0.0250 |
| MRI_IPSI-MRI_CONTRA-NS                   | Day_nr-WEIGHT-BLI_max_flux-BLI_max_radiance                     | 0.9769 | 0.0147 |
| MRI_IPSI-MRI_CONTRA                      | Day_nr-WEIGHT-NS-BLI_max_flux-BLI_max_radiance                  | 0.9766 | 0.0163 |
| MRI_CONTRA-WEIGHT-BLI_max_flux           | Day_nr-MRI_IPSI-NS-BLI_max_radiance                             | 0.9761 | 0.0149 |
| Day_nr-MRI_CONTRA-WEIGHT-NS              | MRI_IPSI-BLI_max_flux-BLI_max_radiance                          | 0.9760 | 0.0189 |
| MRI_CONTRA-WEIGHT-NS-BLI_max_flux        | Day_nr-MRI_IPSI-BLI_max_radiance                                | 0.9759 | 0.0225 |
| MRI_IPSI                                 | Day_nr-MRI_CONTRA-WEIGHT-NS-BLI_max_flux-BLI_max_radiance       | 0.9752 | 0.0195 |
| Day_nr-MRI_CONTRA-WEIGHT-NS-BLI_max_flux | MRI_IPSI-BLI_max_radiance                                       | 0.9742 | 0.0251 |
| MRI_CONTRA                               | Day_nr-MRI_IPSI-WEIGHT-NS-BLI_max_flux-BLI_max_radiance         | 0.9735 | 0.0198 |
| NS                                       | Day_nr-MRI_IPSI-MRI_CONTRA-WEIGHT-BLI_max_flux-BLI_max_radiance | 0.9727 | 0.0183 |

|                                         |                                                                    |        |        |
|-----------------------------------------|--------------------------------------------------------------------|--------|--------|
| MRI_IPSI-MRI_CONTRA-BLI_max_flux        | Day_nr-WEIGHT-NS-BLI_max_radiance                                  | 0.9726 | 0.0124 |
| MRI_IPSI-MRI_CONTRA-NS-BLI_max_flux     | Day_nr-WEIGHT-BLI_max_radiance                                     | 0.9710 | 0.0198 |
| MRI_IPSI-MRI_CONTRA-WEIGHT-BLI_max_flux | Day_nr-NS-BLI_max_radiance                                         | 0.9709 | 0.0165 |
| MRI_IPSI-WEIGHT-NS-BLI_max_flux         | Day_nr-MRI_CONTRA-BLI_max_radiance                                 | 0.9706 | 0.0222 |
| Day_nr-WEIGHT                           | MRI_IPSI-MRI_CONTRA-NS-BLI_max_flux-BLI_max_radiance               | 0.9705 | 0.0200 |
| MRI_CONTRA-BLI_max_flux                 | Day_nr-MRI_IPSI-WEIGHT-NS-BLI_max_radiance                         | 0.9704 | 0.0154 |
| None                                    | Day_nr-MRI_IPSI-MRI_CONTRA-WEIGHT-NS-BLI_max_flux-BLI_max_radiance | 0.9699 | 0.0223 |
| MRI_CONTRA-NS-BLI_max_flux              | Day_nr-MRI_IPSI-WEIGHT-BLI_max_radiance                            | 0.9697 | 0.0155 |
| Day_nr-NS                               | MRI_IPSI-MRI_CONTRA-WEIGHT-BLI_max_flux-BLI_max_radiance           | 0.9692 | 0.0179 |
| Day_nr-MRI_CONTRA                       | MRI_IPSI-WEIGHT-NS-BLI_max_flux-BLI_max_radiance                   | 0.9690 | 0.0216 |
| Day_nr-MRI_CONTRA-WEIGHT-BLI_max_flux   | MRI_IPSI-NS-BLI_max_radiance                                       | 0.9686 | 0.0269 |
| Day_nr-MRI_IPSI-MRI_CONTRA-NS           | WEIGHT-BLI_max_flux-BLI_max_radiance                               | 0.9685 | 0.0249 |
| MRI_IPSI-WEIGHT-BLI_max_flux            | Day_nr-MRI_CONTRA-NS-BLI_max_radiance                              | 0.9681 | 0.0176 |
| Day_nr-WEIGHT-NS                        | MRI_IPSI-MRI_CONTRA-BLI_max_flux-BLI_max_radiance                  | 0.9676 | 0.0162 |

|                                            |                                                             |        |        |
|--------------------------------------------|-------------------------------------------------------------|--------|--------|
| Day_nr-MRI_CONTRA-NS-BLI_max_flux          | MRI_IPSI-WEIGHT-BLI_max_radiance                            | 0.9669 | 0.0217 |
| WEIGHT-NS-BLI_max_flux                     | Day_nr-MRI_IPSI-MRI_CONTRA-BLI_max_radiance                 | 0.9668 | 0.0216 |
| WEIGHT-BLI_max_flux                        | Day_nr-MRI_IPSI-MRI_CONTRA-NS-BLI_max_radiance              | 0.9665 | 0.0213 |
| Day_nr-MRI_CONTRA-BLI_max_flux             | MRI_IPSI-WEIGHT-NS-BLI_max_radiance                         | 0.9656 | 0.0169 |
| MRI_IPSI-MRI_CONTRA-WEIGHT-NS-BLI_max_flux | Day_nr-BLI_max_radiance                                     | 0.9656 | 0.0240 |
| Day_nr-MRI_IPSI-MRI_CONTRA-WEIGHT-NS       | BLI_max_flux-BLI_max_radiance                               | 0.9643 | 0.0239 |
| MRI_IPSI-BLI_max_flux                      | Day_nr-MRI_CONTRA-WEIGHT-NS-BLI_max_radiance                | 0.9629 | 0.0179 |
| Day_nr-WEIGHT-NS-BLI_max_flux              | MRI_IPSI-MRI_CONTRA-BLI_max_radiance                        | 0.9629 | 0.0259 |
| Day_nr-WEIGHT-BLI_max_flux                 | MRI_IPSI-MRI_CONTRA-NS-BLI_max_radiance                     | 0.9619 | 0.0232 |
| BLI_max_flux                               | Day_nr-MRI_IPSI-MRI_CONTRA-WEIGHT-NS-BLI_max_radiance       | 0.9608 | 0.0200 |
| Day_nr                                     | MRI_IPSI-MRI_CONTRA-WEIGHT-NS-BLI_max_flux-BLI_max_radiance | 0.9606 | 0.0185 |
| Day_nr-MRI_IPSI-MRI_CONTRA                 | WEIGHT-NS-BLI_max_flux-BLI_max_radiance                     | 0.9601 | 0.0176 |
| MRI_IPSI-NS-BLI_max_flux                   | Day_nr-MRI_CONTRA-WEIGHT-BLI_max_radiance                   | 0.9587 | 0.0296 |
| Day_nr-MRI_IPSI-MRI_CONTRA-WEIGHT          | NS-BLI_max_flux-BLI_max_radiance                            | 0.9585 | 0.0244 |
| Day_nr-MRI_IPSI-                           | BLI_max_radiance                                            | 0.9578 | 0.0237 |

|                                                        |                                                            |        |        |
|--------------------------------------------------------|------------------------------------------------------------|--------|--------|
| MRI_CONTRA-WEIGHT-<br>NS-BLI_max_flux                  |                                                            |        |        |
| Day_nr-MRI_IPSI-NS                                     | MRI_CONTRA-WEIGHT-<br>BLI_max_flux-<br>BLI_max_radiance    | 0.9562 | 0.0267 |
| Day_nr-MRI_IPSI-WEIGHT-<br>NS                          | MRI_CONTRA-<br>BLI_max_flux-<br>BLI_max_radiance           | 0.9559 | 0.0232 |
| Day_nr-MRI_IPSI-<br>MRI_CONTRA-NS-<br>BLI_max_flux     | WEIGHT-BLI_max_radiance                                    | 0.9551 | 0.0200 |
| NS-BLI_max_flux                                        | Day_nr-MRI_IPSI-<br>MRI_CONTRA-WEIGHT-<br>BLI_max_radiance | 0.9547 | 0.0305 |
| Day_nr-NS-BLI_max_flux                                 | MRI_IPSI-MRI_CONTRA-<br>WEIGHT-BLI_max_radiance            | 0.9539 | 0.0256 |
| Day_nr-BLI_max_flux                                    | MRI_IPSI-MRI_CONTRA-<br>WEIGHT-NS-<br>BLI_max_radiance     | 0.9533 | 0.0235 |
| Day_nr-MRI_IPSI-WEIGHT-<br>BLI_max_flux                | MRI_CONTRA-NS-<br>BLI_max_radiance                         | 0.9521 | 0.0212 |
| Day_nr-MRI_IPSI-<br>BLI_max_flux                       | MRI_CONTRA-WEIGHT-NS-<br>BLI_max_radiance                  | 0.9514 | 0.0287 |
| Day_nr-MRI_IPSI-WEIGHT                                 | MRI_CONTRA-NS-<br>BLI_max_flux-<br>BLI_max_radiance        | 0.9513 | 0.0215 |
| Day_nr-MRI_IPSI-<br>MRI_CONTRA-<br>BLI_max_flux        | WEIGHT-NS-<br>BLI_max_radiance                             | 0.9503 | 0.0288 |
| Day_nr-MRI_IPSI-<br>MRI_CONTRA-WEIGHT-<br>BLI_max_flux | NS-BLI_max_radiance                                        | 0.9491 | 0.0281 |
| Day_nr-MRI_IPSI                                        | MRI_CONTRA-WEIGHT-NS-<br>BLI_max_flux-<br>BLI_max_radiance | 0.9475 | 0.0262 |

|                                                       |                                                   |        |        |
|-------------------------------------------------------|---------------------------------------------------|--------|--------|
| Day_nr-MRI_IPSI-WEIGHT-NS-BLI_max_flux                | MRI_CONTRA-BLI_max_radiance                       | 0.9468 | 0.0285 |
| Day_nr-MRI_IPSI-NS-BLI_max_flux                       | MRI_CONTRA-WEIGHT-BLI_max_radiance                | 0.9441 | 0.0311 |
| Day_nr-MRI_IPSI-MRI_CONTRA-WEIGHT-NS-BLI_max_radiance | BLI_max_flux                                      | 0.8721 | 0.0481 |
| MRI_IPSI-BLI_max_radiance                             | Day_nr-MRI_CONTRA-WEIGHT-NS-BLI_max_flux          | 0.8557 | 0.0314 |
| MRI_IPSI-MRI_CONTRA-WEIGHT-BLI_max_radiance           | Day_nr-NS-BLI_max_flux                            | 0.8552 | 0.0407 |
| Day_nr-MRI_IPSI-MRI_CONTRA-WEIGHT-BLI_max_radiance    | NS-BLI_max_flux                                   | 0.8539 | 0.0481 |
| MRI_IPSI-NS-BLI_max_radiance                          | Day_nr-MRI_CONTRA-WEIGHT-BLI_max_flux             | 0.8537 | 0.0337 |
| MRI_CONTRA-WEIGHT-NS-BLI_max_radiance                 | Day_nr-MRI_IPSI-BLI_max_flux                      | 0.8537 | 0.0455 |
| Day_nr-MRI_CONTRA-WEIGHT-NS-BLI_max_radiance          | MRI_IPSI-BLI_max_flux                             | 0.8504 | 0.0600 |
| MRI_IPSI-MRI_CONTRA-WEIGHT-NS-BLI_max_radiance        | Day_nr-BLI_max_flux                               | 0.8503 | 0.0691 |
| NS-BLI_max_radiance                                   | Day_nr-MRI_IPSI-MRI_CONTRA-WEIGHT-BLI_max_flux    | 0.8482 | 0.0328 |
| BLI_max_radiance                                      | Day_nr-MRI_IPSI-MRI_CONTRA-WEIGHT-NS-BLI_max_flux | 0.8471 | 0.0340 |
| MRI_IPSI-MRI_CONTRA-BLI_max_radiance                  | Day_nr-WEIGHT-NS-BLI_max_flux                     | 0.8447 | 0.0337 |
| MRI_IPSI-WEIGHT-NS-BLI_max_radiance                   | Day_nr-MRI_CONTRA-BLI_max_flux                    | 0.8424 | 0.0472 |

|                                             |                                            |        |        |
|---------------------------------------------|--------------------------------------------|--------|--------|
| MRI_IPSI-MRI_CONTRA-NS-BLI_max_radiance     | Day_nr-WEIGHT-BLI_max_flux                 | 0.8401 | 0.0358 |
| MRI_CONTRA-WEIGHT-BLI_max_radiance          | Day_nr-MRI_IPSI-NS-BLI_max_flux            | 0.8398 | 0.0464 |
| MRI_CONTRA-NS-BLI_max_radiance              | Day_nr-MRI_IPSI-WEIGHT-BLI_max_flux        | 0.8378 | 0.0372 |
| MRI_IPSI-WEIGHT-BLI_max_radiance            | Day_nr-MRI_CONTRA-NS-BLI_max_flux          | 0.8373 | 0.0381 |
| WEIGHT-BLI_max_radiance                     | Day_nr-MRI_IPSI-MRI_CONTRA-NS-BLI_max_flux | 0.8326 | 0.0303 |
| MRI_CONTRA-BLI_max_radiance                 | Day_nr-MRI_IPSI-WEIGHT-NS-BLI_max_flux     | 0.8311 | 0.0387 |
| WEIGHT-NS-BLI_max_radiance                  | Day_nr-MRI_IPSI-MRI_CONTRA-BLI_max_flux    | 0.8273 | 0.0509 |
| Day_nr-BLI_max_radiance                     | MRI_IPSI-MRI_CONTRA-WEIGHT-NS-BLI_max_flux | 0.8258 | 0.0430 |
| Day_nr-MRI_CONTRA-BLI_max_radiance          | MRI_IPSI-WEIGHT-NS-BLI_max_flux            | 0.8254 | 0.0503 |
| Day_nr-MRI_CONTRA-WEIGHT-BLI_max_radiance   | MRI_IPSI-NS-BLI_max_flux                   | 0.8249 | 0.0632 |
| Day_nr-MRI_CONTRA-NS-BLI_max_radiance       | MRI_IPSI-WEIGHT-BLI_max_flux               | 0.8134 | 0.0471 |
| Day_nr-NS-BLI_max_radiance                  | MRI_IPSI-MRI_CONTRA-WEIGHT-BLI_max_flux    | 0.8114 | 0.0400 |
| Day_nr-WEIGHT-BLI_max_radiance              | MRI_IPSI-MRI_CONTRA-NS-BLI_max_flux        | 0.8098 | 0.0472 |
| Day_nr-WEIGHT-NS-BLI_max_radiance           | MRI_IPSI-MRI_CONTRA-BLI_max_flux           | 0.8072 | 0.0407 |
| Day_nr-MRI_IPSI-MRI_CONTRA-BLI_max_radiance | WEIGHT-NS-BLI_max_flux                     | 0.7997 | 0.0756 |
| Day_nr-MRI_IPSI-WEIGHT-                     | MRI_CONTRA-NS-                             | 0.7978 | 0.0627 |

|                                                   |                                      |        |        |
|---------------------------------------------------|--------------------------------------|--------|--------|
| BLI_max_radiance                                  | BLI_max_flux                         |        |        |
| Day_nr-MRI_IPSI-WEIGHT-NS-BLI_max_radiance        | MRI_CONTRA-BLI_max_flux              | 0.7975 | 0.0552 |
| Day_nr-MRI_IPSI-MRI_CONTRA-NS-BLI_max_radiance    | WEIGHT-BLI_max_flux                  | 0.7945 | 0.0537 |
| Day_nr-MRI_IPSI-BLI_max_radiance                  | MRI_CONTRA-WEIGHT-NS-BLI_max_flux    | 0.7808 | 0.0410 |
| Day_nr-MRI_IPSI-NS-BLI_max_radiance               | MRI_CONTRA-WEIGHT-BLI_max_flux       | 0.7744 | 0.0429 |
| BLI_max_flux-BLI_max_radiance                     | Day_nr-MRI_IPSI-MRI_CONTRA-WEIGHT-NS | 0.7651 | 0.0362 |
| MRI_IPSI-BLI_max_flux-BLI_max_radiance            | Day_nr-MRI_CONTRA-WEIGHT-NS          | 0.7614 | 0.0361 |
| Day_nr-BLI_max_flux-BLI_max_radiance              | MRI_IPSI-MRI_CONTRA-WEIGHT-NS        | 0.7461 | 0.0314 |
| MRI_CONTRA-BLI_max_flux-BLI_max_radiance          | Day_nr-MRI_IPSI-WEIGHT-NS            | 0.7404 | 0.0416 |
| WEIGHT-BLI_max_flux-BLI_max_radiance              | Day_nr-MRI_IPSI-MRI_CONTRA-NS        | 0.7343 | 0.0396 |
| Day_nr-MRI_IPSI-BLI_max_flux-BLI_max_radiance     | MRI_CONTRA-WEIGHT-NS                 | 0.7312 | 0.0322 |
| MRI_IPSI-MRI_CONTRA-BLI_max_flux-BLI_max_radiance | Day_nr-WEIGHT-NS                     | 0.7304 | 0.0317 |
| MRI_IPSI-WEIGHT-BLI_max_flux-BLI_max_radiance     | Day_nr-MRI_CONTRA-NS                 | 0.7258 | 0.0342 |
| Day_nr-MRI_CONTRA-BLI_max_flux-BLI_max_radiance   | MRI_IPSI-WEIGHT-NS                   | 0.7252 | 0.0403 |
| Day_nr-WEIGHT-                                    | MRI_IPSI-MRI_CONTRA-NS               | 0.7172 | 0.0351 |



|                                                                             |                                       |        |        |
|-----------------------------------------------------------------------------|---------------------------------------|--------|--------|
| BLI_max_flux-<br>BLI_max_radiance                                           |                                       |        |        |
| NS-BLI_max_flux-<br>BLI_max_radiance                                        | Day_nr-MRI_IPSI-<br>MRI_CONTRA-WEIGHT | 0.7155 | 0.0427 |
| MRI_IPSI-NS-BLI_max_flux-<br>BLI_max_radiance                               | Day_nr-MRI_CONTRA-<br>WEIGHT          | 0.7086 | 0.0401 |
| MRI_CONTRA-NS-<br>BLI_max_flux-<br>BLI_max_radiance                         | Day_nr-MRI_IPSI-WEIGHT                | 0.7060 | 0.0509 |
| MRI_IPSI-MRI_CONTRA-<br>WEIGHT-BLI_max_flux-<br>BLI_max_radiance            | Day_nr-NS                             | 0.7049 | 0.0372 |
| Day_nr-MRI_IPSI-<br>MRI_CONTRA-WEIGHT-<br>BLI_max_flux-<br>BLI_max_radiance | NS                                    | 0.7007 | 0.0555 |
| MRI_IPSI-MRI_CONTRA-<br>NS-BLI_max_flux-<br>BLI_max_radiance                | Day_nr-WEIGHT                         | 0.7003 | 0.0465 |
| Day_nr-MRI_CONTRA-<br>WEIGHT-BLI_max_flux-<br>BLI_max_radiance              | MRI_IPSI-NS                           | 0.6970 | 0.0449 |
| Day_nr-NS-BLI_max_flux-<br>BLI_max_radiance                                 | MRI_IPSI-MRI_CONTRA-<br>WEIGHT        | 0.6876 | 0.0333 |
| Day_nr-MRI_IPSI-NS-<br>BLI_max_flux-<br>BLI_max_radiance                    | MRI_CONTRA-WEIGHT                     | 0.6874 | 0.0384 |
| MRI_CONTRA-WEIGHT-<br>BLI_max_flux-<br>BLI_max_radiance                     | Day_nr-MRI_IPSI-NS                    | 0.6873 | 0.0365 |
| Day_nr-MRI_IPSI-<br>MRI_CONTRA-<br>BLI_max_flux-<br>BLI_max_radiance        | WEIGHT-NS                             | 0.6859 | 0.0414 |
| Day_nr-MRI_IPSI-WEIGHT-                                                     | MRI_CONTRA-NS                         | 0.6822 | 0.0503 |

|                                                                         |                                |        |        |
|-------------------------------------------------------------------------|--------------------------------|--------|--------|
| BLI_max_flux-<br>BLI_max_radiance                                       |                                |        |        |
| Day_nr-MRI_CONTRA-NS-<br>BLI_max_flux-<br>BLI_max_radiance              | MRI_IPSI-WEIGHT                | 0.6796 | 0.0494 |
| Day_nr-MRI_IPSI-<br>MRI_CONTRA-NS-<br>BLI_max_flux-<br>BLI_max_radiance | WEIGHT                         | 0.6525 | 0.0425 |
| Day_nr-MRI_IPSI-WEIGHT-<br>NS-BLI_max_flux-<br>BLI_max_radiance         | MRI_CONTRA                     | 0.6011 | 0.0333 |
| Day_nr-WEIGHT-NS-<br>BLI_max_flux-<br>BLI_max_radiance                  | MRI_IPSI-MRI_CONTRA            | 0.5994 | 0.0338 |
| MRI_IPSI-WEIGHT-NS-<br>BLI_max_flux-<br>BLI_max_radiance                | Day_nr-MRI_CONTRA              | 0.5946 | 0.0300 |
| WEIGHT-NS-BLI_max_flux-<br>BLI_max_radiance                             | Day_nr-MRI_IPSI-<br>MRI_CONTRA | 0.5918 | 0.0286 |
| Day_nr-MRI_CONTRA-<br>WEIGHT-NS-BLI_max_flux-<br>BLI_max_radiance       | MRI_IPSI                       | 0.5576 | 0.0682 |
| MRI_CONTRA-WEIGHT-<br>NS-BLI_max_flux-<br>BLI_max_radiance              | Day_nr-MRI_IPSI                | 0.5313 | 0.0707 |
| MRI_IPSI-MRI_CONTRA-<br>WEIGHT-NS-BLI_max_flux-<br>BLI_max_radiance     | Day_nr                         | 0.4190 | 0.1456 |

ANN - artificial neural network; SPL-sham - sham-operated mice group; SD - standard deviation; MRI\_CONTRA - volume of the contralateral hemisphere measured by MRI; MRI\_IPSI - volume of the ipsilateral hemisphere measured by MRI; BLI\_max\_radiance - surface area of peak radiation measured by bioluminescence method; BLI\_max\_flux - surface area of peak growth measured by bioluminescence method; WEIGHT - animal weight; Day\_nr - day from the middle carotid artery occlusion (MCAO) procedure; NS - scoring of phenotypic neurological assessment
