# Supplementary material for: Innovative statistical approaches: the use of neural networks reduces the sample size in the splenectomy-MCAO mouse model
Source: PubMed Central journal article supplement (PMC11074938; doi:10.3325/cmj.2024.65.122), 2024-04
Supplement: CroatMedJ_65_s009.pdf [file CroatMedJ_65_s009.pdf]

**Supplemental Table 9.** Differences in prediction accuracies of ANN classes SPLX and SPL-sham depending on the exclusion of variables and their combinations, along with the results of the t-test. The ANN was trained using a dataset with all days after a stroke, except the 2nd and 4th days. Values in the table are sorted based on the differences in mean accuracy predictions of classes SPLX and SPL-sham.

| “Out” variable                                        | “In” variable                      | Mean accuracy of SPLX – Mean accuracy of SPL-sham | t-test P-value | Statistically significant difference in the prediction of SPLX and SPL-sham |
|-------------------------------------------------------|------------------------------------|---------------------------------------------------|----------------|-----------------------------------------------------------------------------|
| Day_nr-MRI_IPSI-MRI_CONTRA-WEIGHT-NS-BLI_max_radiance | BLI_max_flux                       | 0.2346                                            | 0.0000         | YES                                                                         |
| Day_nr-MRI_IPSI-MRI_CONTRA-WEIGHT-BLI_max_radiance    | NS-BLI_max_flux                    | 0.2027                                            | 0.0000         | YES                                                                         |
| Day_nr-MRI_CONTRA-WEIGHT-NS-BLI_max_radiance          | MRI_IPSI-BLI_max_flux              | 0.1702                                            | 0.0000         | YES                                                                         |
| Day_nr-MRI_IPSI-MRI_CONTRA-WEIGHT-NS-BLI_max_flux     | BLI_max_radiance                   | 0.1386                                            | 0.0000         | YES                                                                         |
| MRI_CONTRA-WEIGHT-NS-BLI_max_radiance                 | Day_nr-MRI_IPSI-BLI_max_flux       | 0.1308                                            | 0.0000         | YES                                                                         |
| MRI_IPSI-MRI_CONTRA-WEIGHT-NS-BLI_max_radiance        | Day_nr-BLI_max_flux                | 0.1261                                            | 0.0000         | YES                                                                         |
| Day_nr-MRI_CONTRA-WEIGHT-BLI_max_radiance             | MRI_IPSI-NS-BLI_max_flux           | 0.1203                                            | 0.0000         | YES                                                                         |
| Day_nr-MRI_IPSI-WEIGHT-NS-BLI_max_radiance            | MRI_CONTRA-BLI_max_flux            | 0.1202                                            | 0.0000         | YES                                                                         |
| MRI_IPSI-WEIGHT-NS-BLI_max_flux                       | Day_nr-MRI_CONTRA-BLI_max_radiance | 0.1187                                            | 0.0000         | YES                                                                         |
| WEIGHT-NS-BLI_max_flux                                | Day_nr-MRI_IPSI-MRI_CONTRA-        | 0.1185                                            | 0.0000         | YES                                                                         |

|                                                                 |                                         |        |        |     |
|-----------------------------------------------------------------|-----------------------------------------|--------|--------|-----|
|                                                                 | BLI_max_radiance                        |        |        |     |
| Day_nr-MRI_CONTRA-WEIGHT-NS-BLI_max_flux                        | MRI_IPSI-BLI_max_radiance               | 0.1181 | 0.0000 | YES |
| Day_nr-MRI_IPSI-WEIGHT-BLI_max_radiance                         | MRI_CONTRA-NS-BLI_max_flux              | 0.1136 | 0.0000 | YES |
| Day_nr-MRI_IPSI-MRI_CONTRA-BLI_max_radiance                     | WEIGHT-NS-BLI_max_flux                  | 0.1131 | 0.0000 | YES |
| Day_nr-WEIGHT-NS-BLI_max_flux                                   | MRI_IPSI-MRI_CONTRA-BLI_max_radiance    | 0.1124 | 0.0000 | YES |
| MRI_CONTRA-WEIGHT-NS-BLI_max_flux                               | Day_nr-MRI_IPSI-BLI_max_radiance        | 0.1121 | 0.0000 | YES |
| MRI_IPSI-MRI_CONTRA-WEIGHT-NS-BLI_max_flux                      | Day_nr-BLI_max_radiance                 | 0.1078 | 0.0000 | YES |
| MRI_IPSI-MRI_CONTRA-NS-BLI_max_flux                             | Day_nr-WEIGHT-BLI_max_radiance          | 0.1052 | 0.0000 | YES |
| Day_nr-MRI_IPSI-WEIGHT-NS-BLI_max_flux                          | MRI_CONTRA-BLI_max_radiance             | 0.1033 | 0.0000 | YES |
| Day_nr-MRI_IPSI-MRI_CONTRA-NS-BLI_max_radiance                  | WEIGHT-BLI_max_flux                     | 0.1031 | 0.0000 | YES |
| MRI_IPSI-MRI_CONTRA-WEIGHT-BLI_max_radiance                     | Day_nr-NS-BLI_max_flux                  | 0.1022 | 0.0000 | YES |
| MRI_CONTRA-NS-BLI_max_flux                                      | Day_nr-MRI_IPSI-WEIGHT-BLI_max_radiance | 0.1013 | 0.0000 | YES |
| Day_nr-MRI_IPSI-MRI_CONTRA-WEIGHT-BLI_max_flux-BLI_max_radiance | NS                                      | 0.1004 | 0.0000 | YES |
| MRI_CONTRA-WEIGHT-BLI_max_flux                                  | Day_nr-MRI_IPSI-NS-BLI_max_radiance     | 0.1003 | 0.0000 | YES |
| Day_nr-MRI_CONTRA-NS-BLI_max_flux                               | MRI_IPSI-WEIGHT-BLI_max_radiance        | 0.1002 | 0.0000 | YES |
| Day_nr-MRI_CONTRA-                                              | MRI_IPSI-NS-                            | 0.0983 | 0.0000 | YES |

|                                                |                                                    |        |        |     |
|------------------------------------------------|----------------------------------------------------|--------|--------|-----|
| WEIGHT-BLI_max_flux                            | BLI_max_radiance                                   |        |        |     |
| MRI_IPSI-NS-BLI_max_flux                       | Day_nr-MRI_CONTRA-WEIGHT-BLI_max_radiance          | 0.0974 | 0.0000 | YES |
| Day_nr-MRI_CONTRA-BLI_max_flux                 | MRI_IPSI-WEIGHT-NS-BLI_max_radiance                | 0.0942 | 0.0000 | YES |
| Day_nr-MRI_IPSI-MRI_CONTRA-BLI_max_flux        | WEIGHT-NS-BLI_max_radiance                         | 0.0940 | 0.0000 | YES |
| Day_nr-MRI_IPSI-MRI_CONTRA-NS-BLI_max_flux     | WEIGHT-BLI_max_radiance                            | 0.0935 | 0.0000 | YES |
| Day_nr-MRI_IPSI-BLI_max_flux                   | MRI_CONTRA-WEIGHT-NS-BLI_max_radiance              | 0.0934 | 0.0000 | YES |
| Day_nr-MRI_IPSI-MRI_CONTRA-WEIGHT-BLI_max_flux | NS-BLI_max_radiance                                | 0.0927 | 0.0000 | YES |
| Day_nr-MRI_CONTRA-NS                           | MRI_IPSI-WEIGHT-BLI_max_flux-BLI_max_radiance      | 0.0920 | 0.0000 | YES |
| NS-BLI_max_flux                                | Day_nr-MRI_IPSI-MRI_CONTRA-WEIGHT-BLI_max_radiance | 0.0908 | 0.0000 | YES |
| Day_nr-WEIGHT-BLI_max_flux                     | MRI_IPSI-MRI_CONTRA-NS-BLI_max_radiance            | 0.0907 | 0.0000 | YES |
| Day_nr-MRI_IPSI-MRI_CONTRA-NS                  | WEIGHT-BLI_max_flux-BLI_max_radiance               | 0.0907 | 0.0000 | YES |
| MRI_CONTRA-WEIGHT-BLI_max_radiance             | Day_nr-MRI_IPSI-NS-BLI_max_flux                    | 0.0904 | 0.0000 | YES |
| Day_nr-NS-BLI_max_flux                         | MRI_IPSI-MRI_CONTRA-WEIGHT-BLI_max_radiance        | 0.0904 | 0.0000 | YES |
| MRI_CONTRA-BLI_max_flux                        | Day_nr-MRI_IPSI-WEIGHT-NS-BLI_max_radiance         | 0.0896 | 0.0000 | YES |

|                                         |                                                          |        |        |     |
|-----------------------------------------|----------------------------------------------------------|--------|--------|-----|
| MRI_IPSI-WEIGHT-BLI_max_flux            | Day_nr-MRI_CONTRA-NS-BLI_max_radiance                    | 0.0885 | 0.0000 | YES |
| MRI_IPSI-MRI_CONTRA-BLI_max_flux        | Day_nr-WEIGHT-NS-BLI_max_radiance                        | 0.0882 | 0.0000 | YES |
| Day_nr-MRI_IPSI-NS-BLI_max_flux         | MRI_CONTRA-WEIGHT-BLI_max_radiance                       | 0.0878 | 0.0000 | YES |
| MRI_IPSI-MRI_CONTRA-WEIGHT-BLI_max_flux | Day_nr-NS-BLI_max_radiance                               | 0.0874 | 0.0000 | YES |
| Day_nr-MRI_CONTRA-WEIGHT                | MRI_IPSI-NS-BLI_max_flux-BLI_max_radiance                | 0.0869 | 0.0000 | YES |
| Day_nr-NS                               | MRI_IPSI-MRI_CONTRA-WEIGHT-BLI_max_flux-BLI_max_radiance | 0.0864 | 0.0000 | YES |
| WEIGHT-BLI_max_flux                     | Day_nr-MRI_IPSI-MRI_CONTRA-NS-BLI_max_radiance           | 0.0863 | 0.0000 | YES |
| WEIGHT-NS                               | Day_nr-MRI_IPSI-MRI_CONTRA-BLI_max_flux-BLI_max_radiance | 0.0845 | 0.0000 | YES |
| Day_nr-MRI_IPSI-WEIGHT-BLI_max_flux     | MRI_CONTRA-NS-BLI_max_radiance                           | 0.0845 | 0.0000 | YES |
| Day_nr-WEIGHT                           | MRI_IPSI-MRI_CONTRA-NS-BLI_max_flux-BLI_max_radiance     | 0.0839 | 0.0000 | YES |
| MRI_CONTRA-WEIGHT                       | Day_nr-MRI_IPSI-NS-BLI_max_flux-BLI_max_radiance         | 0.0838 | 0.0000 | YES |
| Day_nr-MRI_CONTRA-WEIGHT-NS             | MRI_IPSI-BLI_max_flux-BLI_max_radiance                   | 0.0818 | 0.0000 | YES |
| MRI_CONTRA                              | Day_nr-MRI_IPSI-WEIGHT-NS-BLI_max_flux-BLI_max_radiance  | 0.0815 | 0.0000 | YES |
| Day_nr-BLI_max_flux                     | MRI_IPSI-MRI_CONTRA-                                     | 0.0810 | 0.0000 | YES |

|                                              |                                                                         |        |        |     |
|----------------------------------------------|-------------------------------------------------------------------------|--------|--------|-----|
|                                              | WEIGHT-NS-<br>BLI_max_radiance                                          |        |        |     |
| Day_nr-MRI_IPSI-WEIGHT                       | MRI_CONTRA-NS-<br>BLI_max_flux-<br>BLI_max_radiance                     | 0.0804 | 0.0000 | YES |
| Day_nr-MRI_IPSI-<br>MRI_CONTRA-WEIGHT-<br>NS | BLI_max_flux-<br>BLI_max_radiance                                       | 0.0803 | 0.0000 | YES |
| Day_nr                                       | MRI_IPSI-MRI_CONTRA-<br>WEIGHT-NS-<br>BLI_max_flux-<br>BLI_max_radiance | 0.0790 | 0.0000 | YES |
| Day_nr-MRI_IPSI-NS                           | MRI_CONTRA-WEIGHT-<br>BLI_max_flux-<br>BLI_max_radiance                 | 0.0778 | 0.0000 | YES |
| BLI_max_flux                                 | Day_nr-MRI_IPSI-<br>MRI_CONTRA-WEIGHT-<br>NS-BLI_max_radiance           | 0.0778 | 0.0000 | YES |
| MRI_IPSI-MRI_CONTRA                          | Day_nr-WEIGHT-NS-<br>BLI_max_flux-<br>BLI_max_radiance                  | 0.0773 | 0.0000 | YES |
| Day_nr-MRI_CONTRA                            | MRI_IPSI-WEIGHT-NS-<br>BLI_max_flux-<br>BLI_max_radiance                | 0.0765 | 0.0000 | YES |
| MRI_IPSI-WEIGHT                              | Day_nr-MRI_CONTRA-NS-<br>BLI_max_flux-<br>BLI_max_radiance              | 0.0765 | 0.0000 | YES |
| Day_nr-MRI_IPSI-<br>MRI_CONTRA-WEIGHT        | NS-BLI_max_flux-<br>BLI_max_radiance                                    | 0.0761 | 0.0000 | YES |
| MRI_CONTRA-NS                                | Day_nr-MRI_IPSI-<br>WEIGHT-BLI_max_flux-<br>BLI_max_radiance            | 0.0760 | 0.0000 | YES |
| Day_nr-MRI_IPSI-<br>MRI_CONTRA               | WEIGHT-NS-<br>BLI_max_flux-<br>BLI_max_radiance                         | 0.0756 | 0.0000 | YES |
| MRI_CONTRA-WEIGHT-<br>NS                     | Day_nr-MRI_IPSI-<br>BLI_max_flux-                                       | 0.0755 | 0.0000 | YES |

|                                       |                                                                    |        |        |     |
|---------------------------------------|--------------------------------------------------------------------|--------|--------|-----|
|                                       | BLI_max_radiance                                                   |        |        |     |
| MRI_IPSI-BLI_max_flux                 | Day_nr-MRI_CONTRA-WEIGHT-NS-BLI_max_radiance                       | 0.0754 | 0.0000 | YES |
| WEIGHT                                | Day_nr-MRI_IPSI-MRI_CONTRA-NS-BLI_max_flux-BLI_max_radiance        | 0.0748 | 0.0000 | YES |
| MRI_IPSI-MRI_CONTRA-WEIGHT            | Day_nr-NS-BLI_max_flux-BLI_max_radiance                            | 0.0741 | 0.0000 | YES |
| Day_nr-WEIGHT-NS                      | MRI_IPSI-MRI_CONTRA-BLI_max_flux-BLI_max_radiance                  | 0.0734 | 0.0000 | YES |
| MRI_IPSI-MRI_CONTRA-NS                | Day_nr-WEIGHT-BLI_max_flux-BLI_max_radiance                        | 0.0730 | 0.0000 | YES |
| MRI_IPSI-WEIGHT-NS                    | Day_nr-MRI_CONTRA-BLI_max_flux-BLI_max_radiance                    | 0.0728 | 0.0000 | YES |
| Day_nr-MRI_CONTRA-NS-BLI_max_radiance | MRI_IPSI-WEIGHT-BLI_max_flux                                       | 0.0714 | 0.0000 | YES |
| None                                  | Day_nr-MRI_IPSI-MRI_CONTRA-WEIGHT-NS-BLI_max_flux-BLI_max_radiance | 0.0706 | 0.0000 | YES |
| Day_nr-MRI_IPSI-WEIGHT-NS             | MRI_CONTRA-BLI_max_flux-BLI_max_radiance                           | 0.0705 | 0.0000 | YES |
| Day_nr-MRI_CONTRA-BLI_max_radiance    | MRI_IPSI-WEIGHT-NS-BLI_max_flux                                    | 0.0698 | 0.0000 | YES |
| MRI_IPSI-NS                           | Day_nr-MRI_CONTRA-WEIGHT-BLI_max_flux-BLI_max_radiance             | 0.0675 | 0.0000 | YES |
| Day_nr-MRI_IPSI                       | MRI_CONTRA-WEIGHT-NS-BLI_max_flux-BLI_max_radiance                 | 0.0672 | 0.0000 | YES |

|                                                             |                                                                 |        |        |     |
|-------------------------------------------------------------|-----------------------------------------------------------------|--------|--------|-----|
| MRI_IPSI                                                    | Day_nr-MRI_CONTRA-WEIGHT-NS-BLI_max_flux-BLI_max_radiance       | 0.0665 | 0.0000 | YES |
| NS                                                          | Day_nr-MRI_IPSI-MRI_CONTRA-WEIGHT-BLI_max_flux-BLI_max_radiance | 0.0660 | 0.0000 | YES |
| Day_nr-WEIGHT-NS-BLI_max_radiance                           | MRI_IPSI-MRI_CONTRA-BLI_max_flux                                | 0.0644 | 0.0000 | YES |
| MRI_IPSI-MRI_CONTRA-WEIGHT-NS                               | Day_nr-BLI_max_flux-BLI_max_radiance                            | 0.0626 | 0.0000 | YES |
| Day_nr-MRI_CONTRA-WEIGHT-BLI_max_flux-BLI_max_radiance      | MRI_IPSI-NS                                                     | 0.0611 | 0.0002 | YES |
| MRI_IPSI-WEIGHT-NS-BLI_max_radiance                         | Day_nr-MRI_CONTRA-BLI_max_flux                                  | 0.0608 | 0.0001 | YES |
| MRI_IPSI-MRI_CONTRA-WEIGHT-BLI_max_flux-BLI_max_radiance    | Day_nr-NS                                                       | 0.0587 | 0.0000 | YES |
| Day_nr-WEIGHT-BLI_max_radiance                              | MRI_IPSI-MRI_CONTRA-NS-BLI_max_flux                             | 0.0488 | 0.0008 | YES |
| MRI_IPSI-MRI_CONTRA-NS-BLI_max_radiance                     | Day_nr-WEIGHT-BLI_max_flux                                      | 0.0477 | 0.0001 | YES |
| WEIGHT-NS-BLI_max_radiance                                  | Day_nr-MRI_IPSI-MRI_CONTRA-BLI_max_flux                         | 0.0475 | 0.0029 | YES |
| MRI_CONTRA-NS-BLI_max_radiance                              | Day_nr-MRI_IPSI-WEIGHT-BLI_max_flux                             | 0.0444 | 0.0001 | YES |
| MRI_IPSI-MRI_CONTRA-WEIGHT-NS-BLI_max_flux-BLI_max_radiance | Day_nr                                                          | 0.0398 | 0.4693 | NO  |
| Day_nr-BLI_max_radiance                                     | MRI_IPSI-MRI_CONTRA-WEIGHT-NS-BLI_max_flux                      | 0.0376 | 0.0030 | YES |
| MRI_CONTRA-WEIGHT-                                          | Day_nr-MRI_IPSI-NS                                              | 0.0351 | 0.0127 | YES |

|                                                                       |                                                        |        |        |     |
|-----------------------------------------------------------------------|--------------------------------------------------------|--------|--------|-----|
| BLI_max_flux-<br>BLI_max_radiance                                     |                                                        |        |        |     |
| MRI_IPSI-WEIGHT-<br>BLI_max_radiance                                  | Day_nr-MRI_CONTRA-NS-<br>BLI_max_flux                  | 0.0335 | 0.0135 | YES |
| Day_nr-NS-<br>BLI_max_radiance                                        | MRI_IPSI-MRI_CONTRA-<br>WEIGHT-BLI_max_flux            | 0.0328 | 0.0069 | YES |
| MRI_IPSI-MRI_CONTRA-<br>BLI_max_radiance                              | Day_nr-WEIGHT-NS-<br>BLI_max_flux                      | 0.0304 | 0.0131 | YES |
| MRI_IPSI-NS-<br>BLI_max_radiance                                      | Day_nr-MRI_CONTRA-<br>WEIGHT-BLI_max_flux              | 0.0223 | 0.0468 | YES |
| NS-BLI_max_radiance                                                   | Day_nr-MRI_IPSI-<br>MRI_CONTRA-WEIGHT-<br>BLI_max_flux | 0.0215 | 0.0356 | YES |
| Day_nr-MRI_CONTRA-<br>WEIGHT-NS-<br>BLI_max_flux-<br>BLI_max_radiance | MRI_IPSI                                               | 0.0204 | 0.2527 | NO  |
| WEIGHT-BLI_max_radiance                                               | Day_nr-MRI_IPSI-<br>MRI_CONTRA-NS-<br>BLI_max_flux     | 0.0177 | 0.0864 | NO  |
| MRI_CONTRA-<br>BLI_max_radiance                                       | Day_nr-MRI_IPSI-<br>WEIGHT-NS-BLI_max_flux             | 0.0151 | 0.2110 | NO  |
| Day_nr-MRI_IPSI-NS-<br>BLI_max_radiance                               | MRI_CONTRA-WEIGHT-<br>BLI_max_flux                     | 0.0151 | 0.2416 | NO  |
| MRI_CONTRA-WEIGHT-<br>NS-BLI_max_flux-<br>BLI_max_radiance            | Day_nr-MRI_IPSI                                        | 0.0125 | 0.4799 | NO  |
| MRI_CONTRA-NS-<br>BLI_max_flux-<br>BLI_max_radiance                   | Day_nr-MRI_IPSI-WEIGHT                                 | 0.0090 | 0.5240 | NO  |
| MRI_IPSI-MRI_CONTRA-<br>NS-BLI_max_flux-<br>BLI_max_radiance          | Day_nr-WEIGHT                                          | 0.0044 | 0.7353 | NO  |
| WEIGHT-BLI_max_flux-<br>BLI_max_radiance                              | Day_nr-MRI_IPSI-<br>MRI_CONTRA-NS                      | 0.0029 | 0.8320 | NO  |



|                                                                      |                                                           |         |        |     |
|----------------------------------------------------------------------|-----------------------------------------------------------|---------|--------|-----|
| MRI_IPSI-<br>BLI_max_radiance                                        | Day_nr-MRI_CONTRA-<br>WEIGHT-NS-BLI_max_flux              | 0.0010  | 0.9264 | NO  |
| Day_nr-MRI_CONTRA-<br>BLI_max_flux-<br>BLI_max_radiance              | MRI_IPSI-WEIGHT-NS                                        | 0.0006  | 0.9666 | NO  |
| BLI_max_radiance                                                     | Day_nr-MRI_IPSI-<br>MRI_CONTRA-WEIGHT-<br>NS-BLI_max_flux | -0.0004 | 0.9705 | NO  |
| Day_nr-MRI_CONTRA-NS-<br>BLI_max_flux-<br>BLI_max_radiance           | MRI_IPSI-WEIGHT                                           | -0.0055 | 0.7145 | NO  |
| Day_nr-WEIGHT-<br>BLI_max_flux-<br>BLI_max_radiance                  | MRI_IPSI-MRI_CONTRA-<br>NS                                | -0.0062 | 0.6074 | NO  |
| MRI_IPSI-WEIGHT-<br>BLI_max_flux-<br>BLI_max_radiance                | Day_nr-MRI_CONTRA-NS                                      | -0.0089 | 0.5309 | NO  |
| Day_nr-MRI_IPSI-<br>BLI_max_radiance                                 | MRI_CONTRA-WEIGHT-<br>NS-BLI_max_flux                     | -0.0124 | 0.3780 | NO  |
| MRI_CONTRA-<br>BLI_max_flux-<br>BLI_max_radiance                     | Day_nr-MRI_IPSI-<br>WEIGHT-NS                             | -0.0146 | 0.2741 | NO  |
| NS-BLI_max_flux-<br>BLI_max_radiance                                 | Day_nr-MRI_IPSI-<br>MRI_CONTRA-WEIGHT                     | -0.0177 | 0.1425 | NO  |
| MRI_IPSI-MRI_CONTRA-<br>BLI_max_flux-<br>BLI_max_radiance            | Day_nr-WEIGHT-NS                                          | -0.0188 | 0.1046 | NO  |
| Day_nr-MRI_IPSI-<br>WEIGHT-BLI_max_flux-<br>BLI_max_radiance         | MRI_CONTRA-NS                                             | -0.0201 | 0.1992 | NO  |
| Day_nr-MRI_IPSI-<br>MRI_CONTRA-<br>BLI_max_flux-<br>BLI_max_radiance | WEIGHT-NS                                                 | -0.0260 | 0.0856 | NO  |
| MRI_IPSI-NS-<br>BLI_max_flux-<br>BLI_max_radiance                    | Day_nr-MRI_CONTRA-<br>WEIGHT                              | -0.0275 | 0.0334 | YES |

|                                                                         |                                              |         |        |     |
|-------------------------------------------------------------------------|----------------------------------------------|---------|--------|-----|
| BLI_max_flux-<br>BLI_max_radiance                                       | Day_nr-MRI_IPSI-<br>MRI_CONTRA-WEIGHT-<br>NS | -0.0283 | 0.0173 | YES |
| Day_nr-BLI_max_flux-<br>BLI_max_radiance                                | MRI_IPSI-MRI_CONTRA-<br>WEIGHT-NS            | -0.0304 | 0.0096 | YES |
| MRI_IPSI-BLI_max_flux-<br>BLI_max_radiance                              | Day_nr-MRI_CONTRA-<br>WEIGHT-NS              | -0.0328 | 0.0076 | YES |
| Day_nr-NS-BLI_max_flux-<br>BLI_max_radiance                             | MRI_IPSI-MRI_CONTRA-<br>WEIGHT               | -0.0513 | 0.0000 | YES |
| Day_nr-MRI_IPSI-<br>MRI_CONTRA-NS-<br>BLI_max_flux-<br>BLI_max_radiance | WEIGHT                                       | -0.0529 | 0.0003 | YES |
| Day_nr-MRI_IPSI-<br>BLI_max_flux-<br>BLI_max_radiance                   | MRI_CONTRA-WEIGHT-<br>NS                     | -0.0538 | 0.0001 | YES |
| Day_nr-MRI_IPSI-NS-<br>BLI_max_flux-<br>BLI_max_radiance                | MRI_CONTRA-WEIGHT                            | -0.0548 | 0.0001 | YES |
| Day_nr-WEIGHT-NS-<br>BLI_max_flux-<br>BLI_max_radiance                  | MRI_IPSI-MRI_CONTRA                          | -0.1037 | 0.0000 | YES |
| WEIGHT-NS-<br>BLI_max_flux-<br>BLI_max_radiance                         | Day_nr-MRI_IPSI-<br>MRI_CONTRA               | -0.1046 | 0.0000 | YES |
| MRI_IPSI-WEIGHT-NS-<br>BLI_max_flux-<br>BLI_max_radiance                | Day_nr-MRI_CONTRA                            | -0.1240 | 0.0000 | YES |
| Day_nr-MRI_IPSI-<br>WEIGHT-NS-<br>BLI_max_flux-<br>BLI_max_radiance     | MRI_CONTRA                                   | -0.1314 | 0.0000 | YES |

ANN - artificial neural network; SPLX - splenectomized mice group; SPL-sham - sham-operated mice group; SD - standard deviation; MRI\_CONTRA - volume of the contralateral hemisphere measured by MRI; MRI\_IPSI - volume of the ipsilateral hemisphere measured by MRI; BLI\_max\_radiance - surface area of peak radiation measured by bioluminescence method; BLI\_max\_flux - surface area of peak growth measured by bioluminescence method; WEIGHT -

animal weight; Day\_nr - day from the middle carotid artery occlusion (MCAO) procedure; NS - scoring of phenotypic neurological assessment.
